# Supplementary material for: Chromosome-level draft genome of a diploid plum (Prunus salicina)
Source: PubMed Central journal article supplement (PMC7727024; doi:10.1093/gigascience/giaa130), 2020-12-10

|                                                      |                                                                                                                                                                                                                                                                                                                                                                                                                                                                                                                                                                                                                                                                                                                                                                                                                                                                                                                                                                                                                                                                                                                                                                                                                                                                                                                                                                                                                                                                                                                                                                                                                                                                                                                                                                                             |             |
|------------------------------------------------------|---------------------------------------------------------------------------------------------------------------------------------------------------------------------------------------------------------------------------------------------------------------------------------------------------------------------------------------------------------------------------------------------------------------------------------------------------------------------------------------------------------------------------------------------------------------------------------------------------------------------------------------------------------------------------------------------------------------------------------------------------------------------------------------------------------------------------------------------------------------------------------------------------------------------------------------------------------------------------------------------------------------------------------------------------------------------------------------------------------------------------------------------------------------------------------------------------------------------------------------------------------------------------------------------------------------------------------------------------------------------------------------------------------------------------------------------------------------------------------------------------------------------------------------------------------------------------------------------------------------------------------------------------------------------------------------------------------------------------------------------------------------------------------------------|-------------|
| <b>Manuscript Number:</b>                            | GIGA-D-20-00195R1                                                                                                                                                                                                                                                                                                                                                                                                                                                                                                                                                                                                                                                                                                                                                                                                                                                                                                                                                                                                                                                                                                                                                                                                                                                                                                                                                                                                                                                                                                                                                                                                                                                                                                                                                                           |             |
| <b>Full Title:</b>                                   | The chromosome-level draft genome of a diploid plum ( <i>Prunus salicina</i> )                                                                                                                                                                                                                                                                                                                                                                                                                                                                                                                                                                                                                                                                                                                                                                                                                                                                                                                                                                                                                                                                                                                                                                                                                                                                                                                                                                                                                                                                                                                                                                                                                                                                                                              |             |
| <b>Article Type:</b>                                 | Data Note                                                                                                                                                                                                                                                                                                                                                                                                                                                                                                                                                                                                                                                                                                                                                                                                                                                                                                                                                                                                                                                                                                                                                                                                                                                                                                                                                                                                                                                                                                                                                                                                                                                                                                                                                                                   |             |
| <b>Funding Information:</b>                          | The Industry University Research Collaborative Innovation Major Projects of Guangzhou Science Technology Innovation Commission (201704020021)                                                                                                                                                                                                                                                                                                                                                                                                                                                                                                                                                                                                                                                                                                                                                                                                                                                                                                                                                                                                                                                                                                                                                                                                                                                                                                                                                                                                                                                                                                                                                                                                                                               | Dr Yehua He |
|                                                      | Guangdong Key Laboratory of Innovation Method and Decision Management System (CN) (2016LM1128)                                                                                                                                                                                                                                                                                                                                                                                                                                                                                                                                                                                                                                                                                                                                                                                                                                                                                                                                                                                                                                                                                                                                                                                                                                                                                                                                                                                                                                                                                                                                                                                                                                                                                              | Dr Yehua He |
| <b>Abstract:</b>                                     | <p><b>Background:</b> Plums are one of the most economically important Rosaceae fruit crops, and contain dozens of species distributed across the world. Until now, only limited genomic information is available for the genetic studies and breeding programs of plums. <i>Prunus salicina</i>, an important diploid plum species, plays a predominant role in modern commercial plums production. Here we selected <i>P. salicina</i> for whole-genome sequencing and presented a chromosome-level genome assembly through the combination of PacBio sequencing, Illumina sequencing and Hi-C technology.</p> <p><b>Findings:</b> The assembly had a total size of 284.2 Mb, with contig N50 of 1.8Mb and Scaffold N50 of 32.3 Mb. 96.56% of the assembled sequences were anchored onto eight pseudochromosomes and a total of 24,448 protein-coding genes were identified. Phylogenetic analysis showed that <i>P. salicina</i> had closer relationship with <i>P. mume</i> and <i>P. armeniaca</i>, with <i>P. salicina</i> diverging from their common ancestor approximately 9.05 million years ago (Mya). 146 gene families were expanded during <i>P. salicina</i> evolution, and some cell wall-related GO terms were significantly enriched. It was noteworthy that members in the DUF579 family, a new class involved in xylan biosynthesis, were significantly expanded in <i>P. salicina</i>, which provided new insight into the xylan metabolism in plums.</p> <p><b>Conclusions:</b> We constructed the first high-quality chromosome-level plum genome using PacBio, Illumina and Hi-C technologies. This work provides a valuable resource for facilitating plum breeding programs and studying the genetic diversity mechanisms of plums and <i>Prunus</i> species.</p> |             |
| <b>Corresponding Author:</b>                         | Yehua He<br>Soth China Agricultural University<br>Guangzhou, Guangdong Province CHINA                                                                                                                                                                                                                                                                                                                                                                                                                                                                                                                                                                                                                                                                                                                                                                                                                                                                                                                                                                                                                                                                                                                                                                                                                                                                                                                                                                                                                                                                                                                                                                                                                                                                                                       |             |
| <b>Corresponding Author Secondary Information:</b>   |                                                                                                                                                                                                                                                                                                                                                                                                                                                                                                                                                                                                                                                                                                                                                                                                                                                                                                                                                                                                                                                                                                                                                                                                                                                                                                                                                                                                                                                                                                                                                                                                                                                                                                                                                                                             |             |
| <b>Corresponding Author's Institution:</b>           | Soth China Agricultural University                                                                                                                                                                                                                                                                                                                                                                                                                                                                                                                                                                                                                                                                                                                                                                                                                                                                                                                                                                                                                                                                                                                                                                                                                                                                                                                                                                                                                                                                                                                                                                                                                                                                                                                                                          |             |
| <b>Corresponding Author's Secondary Institution:</b> |                                                                                                                                                                                                                                                                                                                                                                                                                                                                                                                                                                                                                                                                                                                                                                                                                                                                                                                                                                                                                                                                                                                                                                                                                                                                                                                                                                                                                                                                                                                                                                                                                                                                                                                                                                                             |             |
| <b>First Author:</b>                                 | Chaoyang Liu                                                                                                                                                                                                                                                                                                                                                                                                                                                                                                                                                                                                                                                                                                                                                                                                                                                                                                                                                                                                                                                                                                                                                                                                                                                                                                                                                                                                                                                                                                                                                                                                                                                                                                                                                                                |             |
| <b>First Author Secondary Information:</b>           |                                                                                                                                                                                                                                                                                                                                                                                                                                                                                                                                                                                                                                                                                                                                                                                                                                                                                                                                                                                                                                                                                                                                                                                                                                                                                                                                                                                                                                                                                                                                                                                                                                                                                                                                                                                             |             |
| <b>Order of Authors:</b>                             | Chaoyang Liu                                                                                                                                                                                                                                                                                                                                                                                                                                                                                                                                                                                                                                                                                                                                                                                                                                                                                                                                                                                                                                                                                                                                                                                                                                                                                                                                                                                                                                                                                                                                                                                                                                                                                                                                                                                |             |
|                                                      | Chao Feng                                                                                                                                                                                                                                                                                                                                                                                                                                                                                                                                                                                                                                                                                                                                                                                                                                                                                                                                                                                                                                                                                                                                                                                                                                                                                                                                                                                                                                                                                                                                                                                                                                                                                                                                                                                   |             |
|                                                      | Weizhuo Peng                                                                                                                                                                                                                                                                                                                                                                                                                                                                                                                                                                                                                                                                                                                                                                                                                                                                                                                                                                                                                                                                                                                                                                                                                                                                                                                                                                                                                                                                                                                                                                                                                                                                                                                                                                                |             |
|                                                      | Jingjing Hao                                                                                                                                                                                                                                                                                                                                                                                                                                                                                                                                                                                                                                                                                                                                                                                                                                                                                                                                                                                                                                                                                                                                                                                                                                                                                                                                                                                                                                                                                                                                                                                                                                                                                                                                                                                |             |
|                                                      | Juntao Wang                                                                                                                                                                                                                                                                                                                                                                                                                                                                                                                                                                                                                                                                                                                                                                                                                                                                                                                                                                                                                                                                                                                                                                                                                                                                                                                                                                                                                                                                                                                                                                                                                                                                                                                                                                                 |             |
|                                                      | Jianjun Pan                                                                                                                                                                                                                                                                                                                                                                                                                                                                                                                                                                                                                                                                                                                                                                                                                                                                                                                                                                                                                                                                                                                                                                                                                                                                                                                                                                                                                                                                                                                                                                                                                                                                                                                                                                                 |             |

|                                                |                                                                                                                                                                                                                                                                                                                                                                                                                                                                                                                                                                                                                                                                                                                                                                                                                                                                                                                                                                                                                                                                                                                                                                                                                                                                                                                                                                                                                                                                                                                                                                                                                                                                                                                                                                                                                                                                                                                                                                                                                                                                                                                                                                                                                                                                                                                                                                                                                                                                                                                                                                                                                                                                                                                                                                                                                                                                                                                                                                                                                                                                                                                                                                                                                                                                                                                                                                                                                                                                                                                                                                                                                                                                                                                                                                                                                                                                                                                                                                                                                                                                                                                                                                         |
|------------------------------------------------|-------------------------------------------------------------------------------------------------------------------------------------------------------------------------------------------------------------------------------------------------------------------------------------------------------------------------------------------------------------------------------------------------------------------------------------------------------------------------------------------------------------------------------------------------------------------------------------------------------------------------------------------------------------------------------------------------------------------------------------------------------------------------------------------------------------------------------------------------------------------------------------------------------------------------------------------------------------------------------------------------------------------------------------------------------------------------------------------------------------------------------------------------------------------------------------------------------------------------------------------------------------------------------------------------------------------------------------------------------------------------------------------------------------------------------------------------------------------------------------------------------------------------------------------------------------------------------------------------------------------------------------------------------------------------------------------------------------------------------------------------------------------------------------------------------------------------------------------------------------------------------------------------------------------------------------------------------------------------------------------------------------------------------------------------------------------------------------------------------------------------------------------------------------------------------------------------------------------------------------------------------------------------------------------------------------------------------------------------------------------------------------------------------------------------------------------------------------------------------------------------------------------------------------------------------------------------------------------------------------------------------------------------------------------------------------------------------------------------------------------------------------------------------------------------------------------------------------------------------------------------------------------------------------------------------------------------------------------------------------------------------------------------------------------------------------------------------------------------------------------------------------------------------------------------------------------------------------------------------------------------------------------------------------------------------------------------------------------------------------------------------------------------------------------------------------------------------------------------------------------------------------------------------------------------------------------------------------------------------------------------------------------------------------------------------------------------------------------------------------------------------------------------------------------------------------------------------------------------------------------------------------------------------------------------------------------------------------------------------------------------------------------------------------------------------------------------------------------------------------------------------------------------------------------------|
|                                                | Yehua He                                                                                                                                                                                                                                                                                                                                                                                                                                                                                                                                                                                                                                                                                                                                                                                                                                                                                                                                                                                                                                                                                                                                                                                                                                                                                                                                                                                                                                                                                                                                                                                                                                                                                                                                                                                                                                                                                                                                                                                                                                                                                                                                                                                                                                                                                                                                                                                                                                                                                                                                                                                                                                                                                                                                                                                                                                                                                                                                                                                                                                                                                                                                                                                                                                                                                                                                                                                                                                                                                                                                                                                                                                                                                                                                                                                                                                                                                                                                                                                                                                                                                                                                                                |
| <b>Order of Authors Secondary Information:</b> |                                                                                                                                                                                                                                                                                                                                                                                                                                                                                                                                                                                                                                                                                                                                                                                                                                                                                                                                                                                                                                                                                                                                                                                                                                                                                                                                                                                                                                                                                                                                                                                                                                                                                                                                                                                                                                                                                                                                                                                                                                                                                                                                                                                                                                                                                                                                                                                                                                                                                                                                                                                                                                                                                                                                                                                                                                                                                                                                                                                                                                                                                                                                                                                                                                                                                                                                                                                                                                                                                                                                                                                                                                                                                                                                                                                                                                                                                                                                                                                                                                                                                                                                                                         |
| <b>Response to Reviewers:</b>                  | <p>Dear Editor and Reviewers,</p> <p>We would like to thank you for helpful suggestions on our manuscript entitled "The chromosome-level draft genome of a diploid plum (<i>Prunus salicina</i>)" (GIGA-D-20-00195). Following the comments and suggestions, we rewrote the entire manuscript and re-organized the structure of the article. Our genome data have been submitted to Genome Database for Rosaceae (GDR) and received the accession number tfGDR1044. The reviewer's questions regarding heterozygosity, peach physical map and inter-specific hybrid were answered in detail. We carefully proofread the manuscript and corrected inappropriate words and expressions. We have studied the comments carefully and revised the manuscript according to reviewers' suggestions, and we expected that it would meet the publication requirement of GigaScience. A point by point response to the reviewers' comments and questions and the main corrections in the paper were provided below.</p> <p>Reviewer reports:</p> <p>--Reviewer #1:</p> <p># This manuscript reports high-quality assembly and annotation for one Japanese plum (<i>P. salicina</i>) genome. Phylogenetic analysis has been performed based on the identification of orthologous genes. The genomic data are interesting and should be useful for the community, however, the authors do not put forward any clear research question and respective hypotheses. Therefore, the study will be of limited relevance for an international readership. Most importantly, I identified substantial shortcomings that cannot be alleviated on the basis of the data and analyses presented. The main points raised are summarized below:</p> <p>The manuscript is poorly prepared. Material and Methods, Results and Discussion sections are not clearly identified and this does not help to estimate the scope and importance of the results presented. Review and discussion on published results in the similar topics and/or related species appeared insufficient. Material &amp; Methods, Results, mixed with discussion, were not clearly presented. It is fine for results and discussion to be combined, but the results still should be presented first, clearly, then followed by relevant discussion. It also requires a proper Material &amp; Methods section, even presented as supplemental information, but at least clearly identified from the results section. This paper needs substantial improvement of its content organization and clarity to be clear and understandable, before it could be re-submitted as a new manuscript. An alternative would be to present it as a short communication but the decision remains to the editorial board.</p> <p>Response: Thanks for your suggestions. We are very sorry for the inconvenience due to the poor content organization. For the preparation of our original manuscript, we download several published papers in 'Data Note' section, and take them as reference to arrange the contents of our manuscript. We mainly focus on how to describe our data and ignore the content structures. According to the suggestions from you and editor, the content organizations are significantly improved, and the Methods and Results sections could be clearly identified in our revised manuscript. We hope the clear content structure could make it more convenient for your review.</p> <p># The choice of the methodology for genome assembly is also raising question. Japanese plum is self-incompatible, at least in most accessions, and thus highly heterozygous. It is not clear how the authors disentangled the two expected haplotypes (therefore the two sets of 8 pseudomolecules for <i>P. salicina</i>). By the way, it is not clear why they assembled the accession 'Sanyueli', in particular. What is the level of heterozygosity in 'Sanyueli'.</p> <p>Response: Thanks very much for your kindly suggestions.<br/> (1) Assembling the highly heterozygous Japanese plum genome have long been challenging as a result of its self-incompatible nature [1]. The short Illumina reads and</p> |

even hybrid assembly strategies have always been problematic to de novo assemble any complex plant genome having highly heterozygous sequences. However, the problem has been greatly alleviated with the advent of new sequencing technologies as well as accompanying advances in genome assembly algorithms.

In recent years, the single-molecule, real-time (SMRT) PacBio sequencing and chromosome conformation capture (Hi-C) techniques have been used to make significant advances in improving the assembly of plant genomes at the chromosomal level. The PacBio sequencing can generate long reads which overcomes the restriction of the short reads generated from the Illumina sequencing platform [2]. The Hi-C technology has become available to generate reliable chromosome-scale de novo genome assemblies, and the Hi-C data can also be used to phase genome onto separate haplotypes at chromosomal-scale, since homologous chromosomes occupy distinct territories in nuclei, which could be used to distinguish different haplotypes [3].

Moreover, continuous optimizations for the genome assembly algorithms are helpful for us to disentangle the two expected haplotypes of Japanese plum genome. Just as you mentioned, the haplotype phasing is a key problem in heterozygous genome assemblies. The newer generation of genome assemblers, such as FALCON-Phase, Purge Haplotigs and FALCON-Unzip, are able to separate allelic contigs and have considerably improved the quality of highly heterozygous diploid genome [4]. In our study, the pipeline of 'Purge Haplotigs' [5] was used to remove the redundant sequences caused by genomic heterozygosity.

Based on the integration of PacBio sequencing, Hi-C technology and latest generation of genome assemblers, a series of high quality complex plant genomes have been obtained recently, such as the genome of rubber tree (heterozygosity rate of ~1.6%) [6], cushion willow (~0.71%) [7], Camellia sinensis var. sinensis (~1.22%) [8] and Durian (~1.14%) [9]. In our study, the level of heterozygosity for the Japanese plum 'Sanyueli' was about 0.7% (estimated by k-mer analysis), which was significantly lower than many published complex genomes. Therefore, we think it is not a major problem to assemble the Japanese plum genome and disentangle the two expected haplotypes.

(2) The accession 'Sanyueli' is an early-maturing and high-yielding Japanese plum variety and widely cultivated in South China. Besides the economic importance, 'Sanyueli' also has great value in breeding and scientific research for its lowest chilling requirements among the cultivated Japanese plum varieties [10]. Moreover, the preliminary genome survey results show that the heterozygosity rate (~0.7%) of 'Sanyueli' is not very high. Therefore, 'Sanyueli' is selected for the subsequent genome sequencing and assembly in our study.

# Authors used the peach physical map and genome assembly to align the metascaffolds onto 8 pseudo-molecules, corresponding to the eight haploid Prunus chromosomes. How did the authors handle the genomic re-arrangements (translocation, inversions, deletions) between peach and plum? Why didn't they use Japanese plum genetic maps which were previously published?

Response: Thank you very much for your kindly suggestions.

(1) We think there might be some misunderstandings, the peach physical map was not used in the genome assembly process in our study. The chromosome-level de novo genome assembly of Prunus salicina was generated using an integrated strategy that combined PacBio sequencing, Illumina sequencing and Hi-C technology. We used Hi-C to cluster and order contigs of this draft genome assembly into 8 pseudo-molecules, which cover ~96.56% of the total contig length. The genomic data from peach were only used as references in the gene annotation, orthogroup identification and phylogenetic analysis.

(2) Since the peach physical map and genome assembly were not used to align the scaffolds in our study, the genomic re-arrangements between peach and plum were not considered in the genome assembly process. For the Hi-C assisted assembly, we applied LACHESIS to cluster, order, and orient the assembly contigs onto pseudo-molecules.

(3) Genetic maps are useful tools for guiding scaffold anchoring into pseudo-chromosome assembly [11]. Up to now, only a few genetic linkage maps of Japanese plums have been reported [12-15], and there are still several problems in using them for the assisted genome assembly: ① Most of the parents are not local varieties of Japanese plums; ②The marker numbers and chromosome coverage are limited, and several large gaps are found; ③The original data for most of the genetic maps are not available.

Moreover, the mapping algorithms used to build genetic maps can sometimes place markers at incorrect locations, which could lead to errors in the genome assembly [16]. The Hi-C technology employed in our study is a novel strategy combining capture of chromatin interaction within the nucleus and next-generation sequencing. Hi-C data can effectively identify linkage between contigs or scaffolds, allowing contigs being linked to nearly whole chromosome-scale [4]. This method has been widely used in many species and dramatically improved genome assemblies. For example, Jibrán et al. [17] demonstrated that Hi-C analysis had vastly improved the black raspberry genome assembly, yielding a N50 contig size for the Hi-C guided assembly of 31,759,000 bp versus the N50 scaffold size of 48,488 bp for the previously genetic maps-assisted assembled genome of VanBuren et al. [18].

(4) Overall, compared to the published relatively low-density Japanese plum genetic maps, we think that the Hi-C technology has more advantages in the genome assembly. It is certain that the available high-density Japanese plum genetic maps could be used as an important supplement for the improvement of our genome assembly in the future.

# *P. salicina* is inter-fertile with many other *Prunus* species, *P. mume* and *P. armeniaca* included, especially in China. This has been profoundly documented (see Zhang et al, 2018. DOI: 10.1038/s41467-018-04093-z). How did the authors check the fact that cv. 'Sanyueli' is pure Japanese plum and not an inter-specific hybrid?

Response: Thank you very much for your kindly suggestions.

(1) According to the paper you mentioned, there also might be introgression events in Japanese plum cultivars from *Prunus* species. The interspecific cross-compatibility is found among the diploid plum and non-plum species within the subgenus *Prunophora* [19]. Moreover, the diploid plums can also be hybridised with species from the subgenera *Amygdalus* (peach and almond) and *Cerasus* (cherry) but with less fertility [20]. Many interspecific hybrids have been reported and widely cultivated. For example, *Prunus simonii* might be a type of natural hybridization between *P. salicina* and *P. armeniaca* [21]; 'Santa Rosa' is a complex hybrid containing a mixture of *P. salicina*, *P. saimonii*, and *P. Americana* [22].

(2) 'Sanyueli' is a traditional landraces of Japanese plum and widely cultivated in South China, especially in Guangdong Province. 'Sanyueli' has long cultivation history and has been recorded in local gazetteers of Nanhua County in 1843 [23].

(3) Japanese plum originates in China, has a long cultivation history and wide geographical distribution ranging from the southern to the northern areas of the country. 'Sanyueli' is a low-chilling requirement and cold-sensitive Japanese plum variety, mainly distributed in the south of Japanese plum cultivation regions in China [10, 24].

According to the most widely accepted classification [25], *Prunophora* subgenus could be subdivided into the sections *Euprunus* (plum species native to Europe and Asia), *Prunocerasus* (plum species native to North America) and *Armeniaca* (apricot species). Among the species of *Euprunus* and *Prunocerasus* sections, only Japanese plum is widely found in South China region, according to the germplasm resources investigation [10]. Other plum species are not well adapted to the climate in South China, because the winter temperatures could not meet their chilling requirements for normal flowering in most years. The distribution characteristics of plums show that the natural outcrossing between 'Sanyueli' and other plum species in recent years might be considered as rare events.

Among the species in Section Armeniaca, only *Prunus mume* is also widely found in South China, which is overlapped with the distribution of 'Sanyueli'. However, the differences in flowering time might reduce the possibility of natural outcrossing. As far as we know, there are no reports about the natural hybrids between *Prunus mume* and *Prunus salicina*. Boonprakob et al. [26] found that the *P. mume* produce semi-fertile hybrids in crosses with plum species. The interspecific hybrids between *P. mume* cv. Baigo and *P. salicina* cv. Sordum were created with manual hybridization by Hakoda et al. [27], and the hybrids can be easily distinguished with their parents according to the morphological characteristics like flower size and leaf shape.

(4) Overall, the above analyses indicate that the cv. 'Sanyueli' is most likely not from the recent interspecific hybridization. We think it could be a suitable candidate material for the Japanese plum genome sequencing. However, we could not rule out the possibility of the introgression from other germplasms like *P. mume* during the long-term cultivation and domestication of 'Sanyueli'. In the future work, we will perform the whole-genome re-sequencing project for various germplasms within *Prunophora* subgenus. We think the project will help us to better understand the genetic background of 'Sanyueli' and other varieties of Japanese plum.

# Given those issues, the analyses appear rudimentary/descriptive and biased, the main conclusions not reliable enough and the previous studies on diversity and genetic studies in Japanese plums not taken into account.

Response: We agree that the analyses in our study maybe not comprehensive enough and the main conclusions need further experimental verification. However, our paper is submitted as a Data Note, which aims to incentivize and more rapidly release data before subsequent detailed analysis has been carried out, so we mainly focuses on presenting the genome data in our manuscript. We have actually noticed the previous studies on diversity and genetic studies in Japanese plum, and carefully selected cv. 'Sanyueli' for genome sequencing. We think that the completion of our high-quality Japanese plum genome will help to measure and characterize the genetic diversity and determine how this diversity relates to the tremendous phenotypic diversity among plum cultivars.

# This situation is aggravated by the fact that in many instances, writing is not clear and terminology inappropriate, with many awkward or incorrect sentences (for ex. In the abstract, what does 'hold the center of the *Prunus*' mean or what is a 'typical' diploid plum species for the authors?). Attention should be given to using correct terms. A substantial English proofreading is required.

Response: Thank you very much for your kindly suggestions. We are sorry for the unclear writing and inappropriate terminology in our original manuscript. We reorganize the article structures and carefully modify the incorrect sentences that you pointed out. The substantial English proofreading is implemented, and the inappropriate words and expressions are corrected in revised manuscript.

Reviewer #2:

The authors report the first chromosome-level genome assembly of plum (*P. salicina*), which is an economically important fruit crop and therefore provide a useful resource for the research community of this fruit tree. They also provided a phylogenetic analysis with *P. nume* and *P. armenica* and studied gene family expansion in *P. salicina* evolution investigating in particular xylan metabolism which might have an impact on fruit quality.

I believe that the paper is well written and provides a useful resource for the community therefore I would welcome its publication once a few, mostly minor, issues are addressed.

# I have seen that the data is/will be available on public repositories but I did not see the assembled sequences and the usual services like BLAST that would make the

genome truly available for the community. I am not sure whether authors intend to publish this data on their own web-server alongside GigaDB, but I would also recommend to submit sequences/gene predictions to specialized databases like the Genome Database for Rosaceae (GDR) which will make this data easily available for the rosaceae community.

Response: According to your suggestion, we have submitted our genome data to GDR and received the accession number tfGDR1044. The genome data will be available through the link [https://www.rosaceae.org/publication\\_datasets](https://www.rosaceae.org/publication_datasets). (Line 435)

#### Detailed comments

# line 31: "Plums are the economically important" I believe should be "Plums are one of the most economically important... and are produced"

Response: We have corrected it according to your suggestion. (Line 31)

# line 64: originate should be originates

Response: We corrected accordingly. (Line 63)

# line 88: some references here are missing like Daccord et.al, 2017 for the apple GDDH13 genome and Linsmith et al, 2019 for European Pear. The published genomes of Prunus avium, Prunus armenica and Prunus dulcis are also ignored here. I am not an expert in Prunus, but perhaps authors should also consider providing a collinearity analysis with avium and dulcis.

Response: Thanks very much for your kindly suggestions. The references you mentioned have been added in the revised manuscript (Apple GDDH13, Ref 15; European Pear, Ref 17; Sweet cherry, Ref 27; Apricot, Ref 29; Almond, Ref 24)(Line 88-89).According to your suggestion, the collinearity analysis between P. salicina, P. avium and P. dulcis was performed in revised manuscript (Figure 3B, Line 375-379).

# line 105: conversation should be conservation

Response: We corrected accordingly. (Line 108)

# line 119: I guess that by "with unknown bases (N) than 10%" authors mean "with more than 10% unknown bases (N)", and with more than 50% low quality bases... Please rephrase.

Response: We rephrase the sentence according to your suggestion. (Line 124)

# line 145: "were used to estimate the genomic information" I would rephrase this to say that they were used to perform a kmer analysis to estimate the genome size.

Response: Thanks very much for your kindly suggestions. We corrected accordingly. (Line 141)

# lines 156-158: this is what FALCON does, so in my opinion there is no need to repeat this here.

Response: We corrected accordingly. (Line 146)

# line 189: I would remove approaches.

Response: We corrected accordingly. (Line 174)

# line 194: In table 1 it would be interesting to have more information on CEGMA and BUSCO like the % of duplicated genes vs unique etc. which are in the supplementary material

Response: According to your suggestions, more detailed information about CEGMA and BUSCO were added in Table 1.

# line 195: It would be interesting to see how many telomeric sequences are recovered at each end of the assembled chromosomes to show how complete they are. I believe this could be a nice addition to this paragraph.

Response: Thanks very much for your kindly suggestions. According to your suggestions, the telomere sequences were identified by BLASTN searches using tandem repeats of the telomere repeat motif (TTTAGGG), and the results were exhibited in Table S5.

#line 211: remove "of"

Response: We corrected accordingly. (Line 342)

#line 213-214: any comment on why transferase activity and phloem development were enriched?

Response: Thanks very much for your kindly suggestions. The possible causes for the significant enrichment of sieve element occlusion genes in 'phloem development' were discussed in revised manuscript. (Line 348-350)

#line 221-222: maybe authors should have added the protein sequences from *Pyrus Communis* as well. In the gene family identification paragraph *Pyrus communis* is actually mentioned, therefore this might just be an oversight here.

Response: Thanks very much for your kindly suggestions. Sequences from *Prunus salicina* and other 16 sequenced rosids species, including *Pyrus Communis*, were actually used in the gene family identification (Line 240). However, only 7 species (*Prunus persica*, *Prunus avium*, *Prunus mume*, *Pyrus bretschneideri*, *Malus domestica*, *Fragaria vesca* and *Arabidopsis thaliana*) were selected in the homology-based gene prediction (Line 198-199). The *Pyrus Communis* was not included because the *Pyrus bretschneideri* was selected as the representative of pear.

#line 224: SwisssProt should be SwissProt

Response: We corrected accordingly. (Line 220)

#Lines 245-247: It is not clear to me if authors used only Interpro results to annotate the plum proteins with the Gene Ontology? In this case, why did they also perform the BLAST search against NR and SwissProt? Otherwise, how did they use the BLAST results to retrieve the GO terms? Please explain.

Response: We only used the Interpro results to annotate the Japanese plum proteins with the Gene Ontology (GO). The GO IDs for each gene were assigned according to the corresponding InterPro entry. The InterPro database, which includes 14 member databases, integrates diverse information about protein families, domains and functional sites [28]. The InterPro databases group one or more related member databases signatures, and provides additional overarching functional annotations, including GO terms wherever possible. The BLAST search against NR and SwissProt databases were also performed in our study, because they were not integrated into the InterPro databases and had different focuses and distinctive signatures. The NR dataset include the non-redundant protein sequences from GenPept, SwissProt, PIR, PDF, PDB, and NCBI Refseq, and the annotations might be more comprehensive. SwissProt is a curated protein sequence database [29], which might be able to provide the high quality annotation.

#Figure 2: The quality of the figure I saw is quite low and it is difficult to read the names. This might be due to the pdf version I have seen, but please double-check

Response: We checked the quality of Figure 2 again, and found that the low figure quality was due to the PDF version that you have seen. The original figure in TIFF format could be downloaded through the link "Click here to access/download" at the top right corner of the PDF pages.

#Figure 3: *P. armeniaeca* should be *P. armenica*

Response: According to your suggestion, we corrected the scientific name of apricot (in Figure 3) to *P. armeniaca*.

#### Reference

1. Guerra M and Rodrigo J. Japanese plum pollination: A review. *Sci Hortic* 2015; 197:674-686.
2. Wei S, Yang Y and Yin T. The chromosome-scale assembly of the willow genome provides insight into Salicaceae genome evolution. *Hortic Res* 2020; 7(1):1-12.
3. Korb J and Lee C. Genome assembly and haplotyping with Hi-C. *Nat Biotechnol* 2013; 31 (12):1099-1101.
4. Zhang X, Wu R, Wang Y, Yu J and Tang H. Unzipping haplotypes in diploid and polyploid genomes. *Comput Struct Biotechnol J* 2020; 18:66-72.
5. Roach MJ, Schmidt SA and Borneman AR. Purge Haplotigs: allelic contig reassignment for third-gen diploid genome assemblies. *BMC Bioinformatics* 2018; 19

- (1):460.
- 6.Liu J, Shi C, Shi CC, Li W, Zhang QJ, Zhang Y, et al. The Chromosome-Based Rubber Tree Genome Provides New Insights into Spurge Genome Evolution and Rubber Biosynthesis. *Mol Plant* 2020; 13 (2):336-350.
  - 7.Chen JH, Huang Y, Brachi B, Yun QZ, Zhang W, Lu W, et al. Genome-wide analysis of Cushion willow provides insights into alpine plant divergence in a biodiversity hotspot. *Nat Commun* 2019; 10 (1):5230.
  - 8.Zhang Q-J, Li W, Li K, Nan H, Shi C, Zhang Y, et al. SMRT sequencing yields the chromosome-scale reference genome of tea tree, *Camellia sinensis* var. *sinensis*. *BioRxiv* 2020.
  - 9.Teh BT, Lim K, Yong CH, Ng CCY, Rao SR, Rajasegaran V, et al. The draft genome of tropical fruit durian (*Durio zibethinus*). *Nat Genet* 2017; 49 (11):1633-1641.
  - 10.He Yehua, Feng Junting, Guo Cuihong, Han Jingzhong, Xie Zhiliang and Yu Xiaolin. Study on plum germplasm of Guangdong (In Chinese). *Acta Horticulturae Sinica* 2014; 41(S):2610.
  - 11.Xue H, Wang S, Yao JL, Deng CH, Wang L, Su Y, et al. Chromosome level high-density integrated genetic maps improve the *Pyrus bretschneideri* 'DangshanSuli' v1.0 genome. *BMC Genomics* 2018; 19 (1):833.
  - 12.Vieira EA, Nodari, RO, de Mesquita Dantas A C, Ducroquet JPHJ, Dalbó M, & Borges, CV. Genetic mapping of Japanese plum. *Crop Breed Appl Biot* 2005; 5(1):29-37.
  - 13.Salazar JA, Pacheco I, Shinya P, Zapata P, Silva C, Aradhya M, et al. Genotyping by Sequencing for SNP-Based Linkage Analysis and Identification of QTLs Linked to Fruit Quality Traits in Japanese Plum (*Prunus salicina* Lindl.). *Front Plant Sci* 2017; 8:476.
  - 14.Carrasco B, Gonzalez M, Gebauer M, Garcia-Gonzalez R, Maldonado J and Silva H. Construction of a highly saturated linkage map in Japanese plum (*Prunus salicina* L.) using GBS for SNP marker calling. *PLoS One* 2018; 13 (12):e0208032.
  - 15.Zhang Q-p, Wei X, Liu N, Zhang Y-p, Xu M, Zhang Y-j, et al. Construction of an SNP-based high-density genetic map for Japanese plum in a Chinese population using specific length fragment sequencing. *Tree Genetics & Genomes* 2020; 16(1):1-10.
  - 16.Tang H, Zhang X, Miao C, Zhang J, Ming R, Schnable JC, et al. ALLMAPS: robust scaffold ordering based on multiple maps. *Genome Biol* 2015; 16 (1):3.
  - 17.Jibrán R, Dzierzon H, Bassil N, Bushakra JM, Edger PP, Sullivan S, et al. Chromosome-scale scaffolding of the black raspberry (*Rubus occidentalis* L.) genome based on chromatin interaction data. *Hortic Res* 2018; 5(1): 1-11.
  - 18.VanBuren R, Bryant D, Bushakra JM, Vining KJ, Edger PP, Rowley ER, et al. The genome of black raspberry (*Rubus occidentalis*). *Plant J* 2016; 87 (6):535-547.
  - 19.Okie W and Weinberger J. Fruit breeding, volume I: Tree and tropical fruits. John Wiley & Sons, Inc., New York, 1996.
  - 20.Topp BL, Russell DM, Neumüller M, Dalbó MA and Liu W. Plum. In: Maria Luisa Badenes DHB, editor. *Fruit Breeding*. Springer; 2012.p.571-621.
  - 21.Faust M and Surányi D. Origin and dissemination of plums. *Hort Rev.* 1999; 23: 179-231.
  - 22.Karp D. Luther Burbank's plums. *HortScience* 2015; 50(2):189-194.
  - 23.Zhang Jiayan and Zhou En. *Records of Chinese fruit-Journal of plum* (In Chinese). Beijing: China Forestry Publishing House, 1998. p.17-23.
  - 24.Liu Shuo, Xu Ming, Zhang Yuping, Zhang Yujun, Ma Xiaoxue, Zhang Qiuping, Liu Ning, Liu Weisheng. Retrospect, problematical issues and the prospect of plum breeding in China (In Chinese). *Journal of Fruit Science* 2018; 35 (2):231-245.
  - 25.Rehder A. *Manual of cultivated trees and shrubs*. 1949.
  - 26.Boonprakob U and Byrne D. Mume, a possible source of genes in apricot breeding. *Fruit Varieties J* 1990; 44 (3):108-113.
  - 27.Hakoda N, Toyoda R, Tabuchi T, Ogiwara I, Ishikawa S and Shimura I. Morphological characteristics of the interspecific hybrids between Japanese apricot (*Prunus mume*) and Plum (*P. salicina*) (In Japanese). *J JPN SOC HORTIC SCI* 1998; 67 (5):708-714.
  - 28.Finn RD, Attwood TK, Babbitt PC, Bateman A, Bork P, Bridge AJ, et al. InterPro in 2017-beyond protein family and domain annotations. *Nucleic Acids Res* 2017; 45 (D1): D190-D199.
  - 29.Gasteiger E, Jung E and Bairoch AM. SWISS-PROT: connecting biomolecular knowledge via a protein database. *Curr Issues Mol Biol* 2001; 3 (3):47-55.

**Additional Information:**



| Question                                                                                                                                                                                                                                                                                                                                                                                                                                                                                                                            | Response   |
|-------------------------------------------------------------------------------------------------------------------------------------------------------------------------------------------------------------------------------------------------------------------------------------------------------------------------------------------------------------------------------------------------------------------------------------------------------------------------------------------------------------------------------------|------------|
| <p>Are you submitting this manuscript to a special series or article collection?</p>                                                                                                                                                                                                                                                                                                                                                                                                                                                | <p>No</p>  |
| <p><b>Experimental design and statistics</b></p> <p>Full details of the experimental design and statistical methods used should be given in the Methods section, as detailed in our <a href="#">Minimum Standards Reporting Checklist</a>. Information essential to interpreting the data presented should be made available in the figure legends.</p> <p>Have you included all the information requested in your manuscript?</p>                                                                                                  | <p>Yes</p> |
| <p><b>Resources</b></p> <p>A description of all resources used, including antibodies, cell lines, animals and software tools, with enough information to allow them to be uniquely identified, should be included in the Methods section. Authors are strongly encouraged to cite <a href="#">Research Resource Identifiers</a> (RRIDs) for antibodies, model organisms and tools, where possible.</p> <p>Have you included the information requested as detailed in our <a href="#">Minimum Standards Reporting Checklist</a>?</p> | <p>Yes</p> |
| <p><b>Availability of data and materials</b></p> <p>All datasets and code on which the conclusions of the paper rely must be either included in your submission or deposited in <a href="#">publicly available repositories</a> (where available and ethically appropriate), referencing such data using a unique identifier in the references and in the “Availability of Data and Materials” section of your manuscript.</p>                                                                                                      | <p>Yes</p> |

Have you have met the above requirement as detailed in our [Minimum Standards Reporting Checklist?](#)

1           **The chromosome-level draft genome of a diploid**  
2                                   **plum (*Prunus salicina*)**

3           Chaoyang Liu<sup>1,3\*</sup>, Chao Feng<sup>2,\*</sup>, Weizhuo Peng<sup>1,3</sup>, Jingjing Hao<sup>1,3</sup>, Juntao Wang<sup>1,3</sup>  
4                                   Jianjun Pan<sup>4</sup>, Yehua He<sup>1,3</sup>

5  
6           <sup>1</sup> Key Laboratory of Biology and Germplasm Enhancement of Horticultural Crops in  
7           South China, Ministry of Agriculture, South China Agricultural University,  
8           Guangzhou 510642, China

9  
10          <sup>2</sup> Key Laboratory of Plant Resources Conservation and Sustainable Utilization, South  
11          China Botanical Garden, Chinese Academy of Sciences, Guangzhou 510650, China

12  
13          <sup>3</sup> Maoming Branch, Guangdong Laboratory for Lingnan Modern Agriculture,  
14          Maoming 525000, China

15  
16          <sup>4</sup> Agricultural Technology Extension Center of Conghua District, Guangzhou.  
17          Guangzhou 510900, Guangdong Province, China

18  
19          \*Equal contribution

20  
21          Corresponding author: Yehua He (email: [heyehua@hotmail.com](mailto:heyehua@hotmail.com))

30 **Abstract**

31 **Background:** Plums are one of the most economically important Rosaceae fruit crops,  
32 and contain dozens of species distributed across the world. Until now, only limited  
33 genomic information is available for the genetic studies and breeding programs of  
34 plums. *Prunus salicina*, an important diploid plum species, plays a predominant role  
35 in modern commercial plums production. Here we selected *P. salicina* for  
36 whole-genome sequencing and presented a chromosome-level genome assembly  
37 through the combination of PacBio sequencing, Illumina sequencing and Hi-C  
38 technology. **Findings:** The assembly had a total size of 284.2 Mb, with contig N50 of  
39 1.8Mb and scaffold N50 of 32.3Mb. 96.56% of the assembled sequences were  
40 anchored onto eight pseudochromosomes and a total of 24,448 protein-coding genes  
41 were identified. Phylogenetic analysis showed that *P. salicina* had closer relationship  
42 with *P. mume* and *P. armeniaca*, with *P. salicina* diverging from their common  
43 ancestor approximately 9.05 million years ago (Mya). 146 gene families were  
44 expanded during *P. salicina* evolution, and some cell wall-related GO terms were  
45 significantly enriched. It was noteworthy that members in the DUF579 family, a new  
46 class involved in xylan biosynthesis, were significantly expanded in *P. salicina*, which  
47 provided new insight into the xylan metabolism in plums. **Conclusions:** We  
48 constructed the first high-quality chromosome-level plum genome using PacBio,  
49 Illumina and Hi-C technologies. This work provides a valuable resource for  
50 facilitating plum breeding programs and studying the genetic diversity mechanisms of  
51 plums and *Prunus* species.

52

## 53 **Background**

54 Plums are one of the most economically important Rosaceae fruit crops and are  
55 produced throughout the world. About 12.6 million tons of plums (include sloes) are  
56 produced per year (FAOSTAT 2018, <http://faostat.fao.org/>), and the fruits are widely  
57 used for fresh consumption and processing like canning and beverages [1]. There are  
58 19-40 species of plums distributed across Asia, Europe and America. Plums have  
59 great diversity and are considered as a link between the major subgenera in the genus  
60 *Prunus* [2].

61 *Prunus salicina*, commonly called the Japanese plum or Chinese plum, is an  
62 important diploid ( $2x=2n=16$ ) plum species that predominates in the modern  
63 commercial production of plums (Fig. 1). *P. salicina* originates in China and its fruits  
64 are mostly used for fresh consumption for their characteristic taste [3]. Cultivars of *P.*  
65 *salicina* have wide variability in phenology, fruit size and shape, flavour, firmness,  
66 aroma, texture, phenolic composition, antioxidant activity and both skin and pulp  
67 color [4].

68 However, the genetic and genomic information for *P. salicina* as well as most plum  
69 species were scarce [5]. The availability of a fully sequenced and annotated genome  
70 will help to measure and characterize the genetic diversity and determine how this  
71 diversity relates to the tremendous phenotypic diversity among plum cultivars. The  
72 genomic information is essential to support many of the studies involved in  
73 fundamental questions about plums biology and genetics. Moreover, genome-based  
74 tools could be developed to improve breeding works of plums, which were usually  
75 hindered by the high degree of heterozygosity, self-incompatible and long juvenile  
76 stage [2, 5, 6].

77 The fruit firmness, one of the most important indices of plum quality, is closely  
78 associated with cell wall compositions [2]. Xylan is a major component of secondary  
79 cell walls [7], and the xylan metabolism is involved in various aspects of plant growth  
80 and development like fruit ripening and softening [8]. According to previous studies,  
81 the plum species presented more xylose (the main component of xylan) compared to

82 other *Prunus* species, and plums were regarded as one of the richest natural sources of  
83 xyliot [9, 10]. The relatively high levels of xylan-related metabolites may be  
84 associated with the distinct mechanisms of the xylan metabolism in plums, and the  
85 available plum genomic information will be helpful to better understand the  
86 mechanism at molecular level.

87 Genome resources are already available for a number of Rosaceae fruit crops [11],  
88 including apple [12-15], peach [16], pear [17-20], strawberry [21, 22], almond [23,  
89 24], black raspberry [25], sweet cherry [26, 27], apricot [28, 29], loquat [30] and  
90 *Prunus mume* [31]. However, whole-genome sequencing and chromosome-level  
91 assembly for plums have not been reported until now. In this study, *P. salicina* was  
92 selected for the whole-genome sequencing as a genomic reference. A high-quality  
93 chromosome-level *de novo* genome assembly of *P. salicina* was generated using an  
94 integrated strategy that combines PacBio sequencing, Illumina sequencing and Hi-C  
95 technology. The assembly has a total size of 284.2 Mb with contig N50 of 1.8Mb and  
96 scaffold N50 of 32.3 Mb, and vast majority (96.56%) of the assembled sequence was  
97 anchored onto eight pseudochromosomes. The availability of the high-quality  
98 chromosome-scale genome sequences not only provides fundamental knowledge  
99 regarding plum biology but also presents a valuable resource for genetic diversity  
100 analysis and breeding programs of plums and other *Prunus* crops.

101

## 102 **Methods**

### 103 **Sample collection**

104 The *Prunus salicina* Lindl. cv. ‘Sanyueli’, a Japanese plum landrace originating from  
105 Southern China, was selected for genome sequencing and assembly. ‘Sanyueli’ has a  
106 cultivation history of more than 200 years and many distinctive characteristics,  
107 including early-maturation, high-yield and low chilling requirements. The samples of  
108 the ‘Sanyueli’ were kept at the Horticultural Germplasm Conservation Center of  
109 South China Agricultural University (SCAU) for breeding and research in Guangzhou,  
110 Guangdong Province, China (113°22'4" N, 23°9'5" E). Total genomic DNA was

111 extracted from fresh young leaves of 5-year-old *P. salicina* tree using the CTAB  
112 method [32]. Samples from a total of six tissues, including leaf, flower, branch, young  
113 fruit pericarp, young fruit pulp and matured fruit, were collected from the same *P.*  
114 *salicina* tree. Total RNA was extracted from the six tissues using E.N.Z.A.<sup>®</sup> Plant  
115 RNA kit (OMEGA).

116

### 117 **Library construction and sequencing**

118 A combination of PacBio single-molecule real-time (SMRT) sequencing, Illumina's  
119 paired-end sequencing and Hi-C technology was applied. For PacBio sequencing,  
120 SMRT libraries were constructed using the PacBio 20-kb protocol  
121 (<https://www.pacb.com/>). The Illumina DNA paired-end libraries were constructed  
122 with an insert size of 350 bp, and sequencing was performed on the Illumina HiSeq  
123 4000 platform according to the manufacturer's instructions. Reads with adaptors, with  
124 more than 10% unknown bases (N) and with more than 50% low-quality bases ( $\leq 5$ )  
125 were filtered out to gain the clean data for further analysis.

126 The Hi-C library was prepared using the standard procedures. The young leaves of  
127 the same *P. salicina* tree were used as starting materials. Nuclear DNA from young  
128 leaves was cross-linked in situ, extracted, and digested with DpnII restriction  
129 endonuclease. The 5' overhangs of the digested fragments were biotinylated, and the  
130 resulting blunt ends were ligated. The cross-links were reversed after ligation,  
131 proteins were removed to release the DNA molecules. The purified DNA was sheared  
132 to a mean fragment size of 350 bp and ligated to adaptors, followed by purification  
133 through biotin-streptavidin-mediated pull down. The quality of Hi-C sequencing was  
134 evaluated with HiCUP [33].

135 The RNA-seq libraries for the six tissues of *P. salicina* were constructed according  
136 to the manufacturer's protocols, and were sequenced by Illumina HiSeq 4000 in  
137 paired-end 150bp mode.

138

### 139 **Genome size estimation and *de novo* assembly**

140 Sequencing data from the Illumina library were used to perform a k-mer analysis to

141 estimate the genome size of *P. salicina*. Quality-filtered reads were subjected to  
142 17-mer frequency distribution analysis using SOAPdenovo (SOAPdenovo, RRID:  
143 SCR\_010752) [34].

144 The *de novo* assembly of the *P. salicina* genome was carried out using the  
145 FALCON assembler (FALCON, RRID: SCR\_016089) [35], followed by the polishing  
146 with Quiver [36] and Pilon (Pilon, RRID: SCR\_014731) [37]. The PacBio subreads  
147 were subsequently processed by a self-correction of errors using FALCON [35]  
148 according to the manufacturer's instructions with the following parameters:  
149 length\_cutoff = 7,000, length\_cutoff\_pr = 4,000, max\_diff = 100, max\_cov = 100. The  
150 draft assembly was further polished using Quiver [36]. The pipeline of 'Purge  
151 Haplotigs' was used to remove the redundant sequences caused by genomic  
152 heterozygosity [38]. Finally, the Illumina reads were mapped back to the assembly  
153 and the remaining errors were corrected by Pilon [37].

154 Clean Hi-C reads were aligned to the assembled genome with BWA aligner (BWA,  
155 RRID: SCR\_010910) with default parameters [39]. Only uniquely aligned read pairs  
156 whose mapping quality more than 20 were remained for further analysis. Invalid read  
157 pairs, including dangling-end and self-cycle, relegation, and dumped products, were  
158 filtered by HiCUP [33]. The valid interaction pairs were used to cluster, order, and  
159 orient the assembly contigs onto pseudochromosomes by LACHESIS (LACHESIS,  
160 RRID:SCR\_017644; parameters: CLUSTER\_N = 8, CLUSTER\_MIN\_RE\_SITES  
161 = 1157, CLUSTER\_MAX\_LINK\_DENSITY = 5, CLUSTER  
162 \_NONINFORMATIVE\_RATIO = 0) [40]. The Juicebox [41] was applied to build the  
163 interaction matrices and complete the visual correction.

164

### 165 **Genome quality evaluation**

166 To evaluate the coverage of the assembly, the paired-end Illumina short reads were  
167 aligned to the assembly using BWA. RNA-seq reads from six tissues of *P. salicina*  
168 were mapped against our assembly using Hisat with default parameters [42]. The  
169 SNPs were counted to evaluate the accuracy of the genome assembly. For CEGMA  
170 (Core Eukaryotic Genes Mapping Approach; CEGMA, RRID: SCR\_015055)



171 evaluation, a set of highly reliable conserved protein families that occur in a range of  
172 model eukaryotes were build and then the 248 core eukaryotic genes were mapped to  
173 the genome [43]. Genome completeness was also accessed using BUSCO  
174 (Benchmarking Universal Single-Copy Orthologs; RRID: SCR\_015008) analysis  
175 which included a set of 1440 single-copy orthologous genes [44].

176

### 177 **Repeat annotations**

178 To annotate repeat elements in the *P. salicina* genome, a combined strategy based on  
179 homology searching and *de novo* prediction was applied. For homology-based  
180 prediction, interspersed repeats were identified using RepeatMasker  
181 (<http://www.repeatmasker.org>) (RepeatMasker, RRID: SCR\_012954) and  
182 RepeatProteinMask (RepeatProteinMask, RRID: SCR 012954) [45] to search against  
183 the Repbase database [46]. For *de novo* prediction, RepeatScout  
184 (<http://www.repeatmasker.org/>) (RepeatScout, RRID:SCR 014653) [47],  
185 RepeatModeler (<http://www.repeatmasker.org/RepeatModeler/>) RepeatModeler  
186 (RRID:SCR\_015027), and LTR\_Finder ([http://tlife.fudan.edu.cn/tlife/ltr\\_finder/](http://tlife.fudan.edu.cn/tlife/ltr_finder/))  
187 (LTR\_Finder, RRID:SCR\_015247) [48] were used to identify *de novo* involved  
188 repeats. Tandem repeats were also *de novo* predicted using Tandem Repeats Finder  
189 (TRF) [49].

190 Telomere sequences were identified by BLASTN searches of both ends of the  
191 pseudochromosomes using four tandem repeats of the telomere repeat motif  
192 (TTTAGGG) with e-value cut-off of 0.003.

193

### 194 **Gene annotations**

195 A combination of three approaches, including homology-based prediction, *de novo*  
196 prediction and transcriptome-based prediction, was used to predict the protein-coding  
197 genes within *P. salicina* genome. For homology-based prediction, the homologous  
198 protein sequences of *Prunus persica*, *Prunus avium*, *Prunus mume*, *Pyrus*  
199 *bretschneideri*, *Malus domestica*, *Fragaria vesca* and *Arabidopsis thaliana* were  
200 obtained from NCBI database and mapped onto the *P. salicina* genome using TblastN

201 (TBLASTN; RRID:SCR\_011822) (E-value  $\leq 1e-5$ ) [50], and then the matching  
202 proteins were aligned to the homologous genome sequences for accurate spliced  
203 alignments with GeneWise (GeneWise, RRID:SCR\_015054) [51] to define gene  
204 models. For *de novo* prediction, Augustus (Augustus, RRID: SCR\_008417) [52],  
205 GlimmerHMM (GlimmerHMM, RRID: SCR\_002654) [53], SNAP (SNAP, RRID:  
206 SCR\_002127) [54], GeneID (GeneID, RRID: SCR\_002473) [55] and Genescan  
207 (Genescan, RRID: SCR\_012902) [56] were used to predict the coding regions of  
208 genes. For transcriptome-based predictions, RNA-seq data from six tissues were used  
209 for genome annotation, processed by HISAT2 (HISAT2, RRID: SCR\_015530) [42],  
210 and Stringtie (StringTie, RRID: SCR\_016323) [57]. RNA-seq data were also *de novo*  
211 assembled with Trinity (Trinity, RRID: SCR\_013048) [58]. The assembled sequences  
212 were aligned against *P. salicina* genome with PASA (Program to Assemble Spliced  
213 Alignment, PASA, RRID: SCR\_014656) [59], and the effective alignments were  
214 assembled to gene structures. Gene models predicted by all of the methods were  
215 integrated by EVIDENCEModeler (EVIDENCEModeler, RRID: SCR\_014659) [59]. To  
216 update the gene models, PASA was further used to generate UTRs [59].

217

## 218 **Gene functions**

219 The functional annotation of protein-coding genes within *P. salicina* genome was  
220 carried out by aligning protein sequences against SwissProt [60] and NR databases  
221 using BLASTp (with a threshold of E-value  $\leq 1e-5$ ). The protein motifs and domains  
222 were annotated by searching against InterPro (InterPro, RRID: SCR\_006695) [61] and  
223 Pfam (Pfam, RRID: SCR\_004726) database [62] with InterProScan (InterProScan,  
224 RRID: SCR\_005829) [63]. Gene Ontology (GO) terms for each gene were retrieved  
225 according to the corresponding InterPro entry. KEGG pathway was mapped by the  
226 constructed gene set to identify the best match for each gene [64].

227

## 228 **Non-coding RNA annotation**

229 The tRNAs were predicted using the program tRNAscan-SE (tRNAscan-SE, RRID:  
230 SCR\_010835) [65], and rRNA genes were annotated using BLASTN (BLASTN,

231 RRID: SCR\_001598) tool with E-value of 1e-5 against rRNA sequences from several  
232 relative plant species. miRNA and snRNA were identified by searching against the  
233 Rfam (Rfam, RRID:SCR\_007891) database [66] with default parameters using the  
234 INFERNAL software (INFERNAL, RRID:SCR\_011809)[67].

235

### 236 **Gene family construction**

237 OrthoFinder version 2.3.3 (OrthoFinder, RRID:SCR\_017118) [68] was used to  
238 classify the orthogroups of proteins from *P. salicina* and 16 other sequenced rosids  
239 species, including *P. armeniaca*, *P. mume*, *P. persica*, *P. dulcis*, *P. avium*, *P. yedoensis*,  
240 *M. domestica*, *P. bretschneideri*, *Pyrus communis*, *F. vesca*, *Potentilla micrantha*,  
241 *Rosa chinensis*, *Rosa multiflora*, *Rubus occidentalis*, *Morus notabilis* and *A. thaliana*.

242

### 243 **Phylogenetic tree and divergence time estimation**

244 For phylogenetic tree construction, proteins of single-copy orthogroups (i.e., the  
245 orthogroups which contain none or only one genes for each species) presented in at  
246 least 70% of species were selected and aligned with MAFFT version 6.846b (MAFFT,  
247 RRID: SCR\_011811) [69]. After determination of the best substitution model for each  
248 orthogroup with IQ-TREE version 1.7-beta12 (IQ-TREE, RRID: SCR\_017254) [70],  
249 the maximum likelihood phylogenetic tree across the 17 plant species was constructed  
250 using IQ-TREE with the parameter (-p -bb 1000), setting *A. thaliana* as outgroup.

251 The divergence time of each node in the phylogenetic tree was estimated with  
252 Bayesian Evolutionary Analysis Sampling Trees (BEAST, RRID: SCR\_010228)  
253 [71]. Two fossil constraints and a secondary calibration node were applied. The fossil  
254 *Prunus wutuensis* (age: Early Eocene, minimum age of 55.0 Mya) and the fossil  
255 *Rubus acutiformis* (age: Middle Eocene, minimum age of 41.3 Mya) were placed at  
256 the stem *Prunus* and *Rubus*, respectively [72]. For the secondary calibration node, the  
257 divergence of Rosoideae and Amygdaloideae at 100.7 Mya was dated according to  
258 Xiang et al. [72]. The Markov chain Monte Carlo was reported 10,000,000 times with  
259 1000 steps.

260

261 **Gene family expansion and contraction analysis**

262 For gene family expansion and contraction analysis, the ancestral gene content of  
263 each cluster at each node was investigated with CAFÉ version 3.1 (CAFÉ, RRID:  
264 SCR\_005983) [73], basing on the phylogeny and gene numbers per orthogroup in  
265 each species, the gene family expansions/contractions at each branch were determined  
266 with  $p$ -value  $< 0.001$ .

267

268 **Genome synteny analysis**

269 A Python version of MCScan (minspan=100; MCScan, RRID: SCR\_017650;  
270 <https://github.com/tanghaibao/jcvi/wiki/MCscan>) was employed to analyze the  
271 synteny between the *P. salicina* genome and other genomes within *Prunus* following  
272 the approaches of Haibao Tang [74].

273

274 **Positively selected gene analysis**

275 The ratios of nonsynonymous to synonymous substitutions ( $Ka/Ks$ ) were calculated  
276 using the Codeml program with the free-ratio model as implemented in the PAML  
277 (PAML, RRID: SCR\_014932) package [75]. The positive selection analysis was  
278 performed using the Codeml program with the optimized branch-site model as  
279 implemented in the PAML package. The positively selected genes were subjected to  
280 GO functional annotation.

281

282 **Gene Ontology enrichment analysis**

283 The Gene Ontology (GO) enrichment analysis for the specific groups of genes (e.g.  
284 tandem duplication and expanded genes) were performed using R package ‘topGO’  
285 [76], setting all *P. salicina* genes as background. The lowest-level GO terms under  
286 enrichment ( $p$ -value  $< 0.01$ ) were focused, and  $p$ -value was calculated using a ‘classic’  
287 algorithm with the ‘fisher’ test. The lowest-level GO terms was based on the directed  
288 acyclic graph (DAG) of GO, with the parameter ‘nodeSize = 100’.

289

290 **The identification of the DUF579 family members**

291 For the identification of the DUF579 family members, the hidden Markov model  
292 (HMM) profile corresponding to the DUF579 domain (PF04669) was downloaded  
293 from Pfam database (<http://pfam.sanger.ac.uk/>), and subsequently exploited for the  
294 genome of *P. salicina*, *P. persica*, *P. mume*, *P. armeniaca*, *P. dulcis* and *A. thaliana*  
295 using HMMER 3.0. The default parameters were employed and the cutoff value was  
296 set to 0.01.

297

## 298 **Results and Discussion**

### 299 **Genome sequencing and assembly**

300 We sequenced and assembled the genome of *P. salicina* using a combination of  
301 short-read sequencing from Illumina Hiseq, SMRT sequencing from PacBio and Hi-C  
302 technology. For the Illumina sequencing, a total of approximately 26.6 Gb (85.4 ×  
303 coverage) short reads was obtained (Table S1). A total of ~53.0 Gb long-sequencing  
304 reads were generated by PacBio Sequel platform. After removing adaptors within  
305 sequences, about 52.9 Gb (169.7 × coverage) subreads were obtained (Table S1). The  
306 subreads have a mean length of 13.2 kb (Table S2). About 59.1 Gb (189.5 × coverage)  
307 sequencing data generated from Hi-C library was produced (Table S1). The quality of  
308 Hi-C sequencing was evaluated with HiCUP [33], and the effect rate was  
309 approximately 28.10% (Table S3).

310 In the genome assembly process, Illumina sequencing data were used for the  
311 genome survey and polishing of preliminary contigs, PacBio long reads were used for  
312 contig assembly and Hi-C reads were used for chromosome-level scaffolding. Based  
313 on the total number of k-mers (19,341,904,177), the estimated *P. salicina* genome size  
314 was calculated to be approximately 311.82 Mb (Figure S1). The heterozygous and  
315 repeat sequencing ratios were 0.70% and 54.49%, respectively (Table S4). The *de*  
316 *novo* genome assembly of *P. salicina* with a total length of 284.2 Mb (Table 1) was  
317 yielded. As shown in Fig. 1, the Hi-C assisted genome assembly was anchored onto  
318 the eight pseudochromosomes with lengths ranging from 23.70 to 54.53 Mb (Table  
319 S5). Five regions of tandemly repeated telomeric repeat sequences were identified on

320 three pseudochromosomes (Table S5). The total length of pseudochromosomes  
321 accounted for 96.56% of the genome sequences (Figure 1), with contig N50 of 1.78  
322 Mb and scaffold N50 of 32.32 Mb (Table1; Table S6).

323

### 324 **Evaluation of the genome assembly**

325 To assess the genome assembly quality, the Illumina clean data were aligned to the *P.*  
326 *salicina* genome, with the mapping rate of 96.93%. A total of 98.81% assembled  
327 genome was covered by the reads and the mapping coverage with at least 4×, 10×,  
328 20× was 98.48 %, 98.06% and 97.13%, respectively (Table1; Table S7). The RNA-seq  
329 reads were mapped against the genome assembly, and the percentage of aligned reads  
330 ranged from 92.44% to 95.25% (Table1; Table S8). A total of 3,668 homozygous  
331 SNPs were identified, accounting for only 0.0015% of the reference genome (Table  
332 S9). The low rate of homozygous SNPs suggested that the assembly had a high base  
333 accuracy. 234 Core Eukaryotic Genes (CEGs) out of the complete set of 248 CEGs  
334 (94.35%) were covered by the assembly, and 229 (92.34%) of these were complete  
335 (Table1; Table S10). BUSCO analysis based on single copy orthologs set showed that  
336 95.7% of the expected genes were identified as complete, 1.3% were fragmented, and  
337 only 3.0% were missing (Table1; Table S11). These results verified the high quality of  
338 the presently generated *P. salicina* genome assembly

339

### 340 **Genome annotation**

341 The results of the repeat annotations found that 48.28% of the assembly was covered  
342 with transposable elements (TE). Among them, long terminal repeat (LTR)  
343 retrotransposons represented the greatest proportion, making up 42.10% of the  
344 genome (Table1; Table S12). The TE percentage and density of duplicates resulted  
345 from tandem duplications were shown in Figure 1. Tandem duplicates occurred for  
346 9.8% of the genes (Table 1) and were preferentially enriched in ‘transferase activity  
347 (GO: 0016758 and GO: 0016747)’ and ‘phloem development (GO: 0010088)’ (Figure  
348 S2). The significant enrichment of the sieve element occlusion genes in ‘phloem  
349 development’, which were involved in wound sealing of the phloem [77], might be

350 associated with specific requirements during the damage response in *P. salicina*.

351 For gene annotations, we predicted 24,448 non-redundant protein-coding genes in  
352 *P. salicina*. There were 24,209 genes (~99.0%) that could be assigned to eight  
353 pseudochromosomes (Table 1), and the gene density was shown in Figure 1. The  
354 average number of exons per gene, and average CDS length were 4.97 and 1,157.42,  
355 respectively (Table 2). Further gene functional annotation showed that 23,931 (97.9%)  
356 protein-coding genes were successfully annotated (Table 1; Table S13). For the  
357 identification of non-coding RNA (ncRNA) genes, a total of 627 miRNA, 960 tRNA,  
358 273 rRNA and 2,023 snRNA in the *P. salicina* genome were predicted (Table S14).

359

### 360 **Evolution of the *P. salicina* genome**

361 The genome sequences of the representative sequenced rosid species were collected  
362 and subjected to comparative genomic analysis with *P. salicina* to reveal the genome  
363 evolution and divergence of *P. salicina*. A total of 15,751 orthogroups containing  
364 23,265 genes were found in *P. salicina*. Moreover, 1,010 genes which were specific to  
365 *P. salicina* were identified. A comparison of the predicted proteomes among the 17  
366 species indicated that 9,616, 10,447, 11,098, 13,963 and 15,512 orthogroups were  
367 shared between *P. salicina* and Rosids, Rosales, Rosaceae, Amygdaloideae and  
368 *Prunus*, respectively.

369 The phylogenetic analysis confirmed the close relationship among *P. salicina*, *P.*  
370 *mume* and *P. armeniaca*. The molecular clock of these plant genomes was also  
371 calculated. The data indicated that *P. salicina* diverged from the ancestor of *P. mume*  
372 and *P. armeniaca* approximately 9.05 Mya, from the ancestor of *P. persica* and  
373 *P.dulcis* 11.12 Mya (Figure 2).

374 We also explored the genome syntenic blocks between *P. salicina* and the other  
375 representative *Prunus* species. As shown in Fig. 3, our genome assembly of *P.*  
376 *salicina* exhibited a high level of genome synteny with all the other *Prunus* genomes,  
377 especially the genomes of *P. avium* and *P. dulcis*. Significantly fewer inversions were  
378 found in *P. salicina* vs *P. avium* and *P. salicina* vs *P. dulcis* than that in *P. salicina* vs *P.*  
379 *mume* and *P. salicina* vs *P. armeniaca*.

380

### 381 **Expansion and contraction of gene families in *P. salicina***

382 The gene family analysis showed that during the evolution of *P. salicina*, 146 gene  
383 families were expanded and 500 gene families were contracted. The functional  
384 enrichment on Gene Ontology of those expanded gene families identified 60  
385 significantly enriched GO terms ( $p$ -value  $< 0.05$ ) (Table S15; Figure S3).

386 It was noteworthy that genes from the expanded families were enriched in a series  
387 of cell wall related processes, such as ‘cell wall polysaccharide metabolic process  
388 (GO: 0010383)’, ‘hemicellulose metabolic process (GO: 0010410)’ and ‘regulation of  
389 cellular biosynthetic process (GO: 0031326)’. Specially, genes in ‘xylan biosynthetic  
390 process (GO: 0045492)’, which corresponded to the DUF579 family [78], were  
391 significantly expanded. Further investigation showed that the major copy differences  
392 were found in Clade II, which consisted of orthologs of IRX15/IRX15L [78], with  
393 seven members in *P. salicina* and only two to four members in other *Prunus* species  
394 (Figure 4). It was reported that IRX15 and IRX15L defined a new class of genes  
395 involved in xylan biosynthesis [79, 80]. The species-specific expansion of this new  
396 subclade might contribute to the relatively high content of xylan-related metabolites  
397 (like xylose and xyliot) in plum [9, 10], which provided new insight into the xylan  
398 metabolism in plum.

399 Moreover, the FRS (FAR1-related sequence) gene family, which played multiple  
400 roles in a wide range of cellular processes [81], was also significantly expanded in the  
401 phylogeny (GO: 000945), and the family expansion may be related to the genetic and  
402 phenotypic diversity in *P. salicina*.

403

### 404 **Positively selected genes in *P. salicina***

405 The Ka/Ks ratios for all the 2,314 single-copy orthologs shared with the sequenced  
406 *Prunus* species were calculated. A total of 213 candidate genes in *P. salicina*  
407 underwent positive selection ( $P < 0.05$ ). Most of them were enriched in the GO terms  
408 involved in ‘monooxygenase activity (GO: 0004497)’ and ‘enzyme inhibitor activity  
409 (GO: 0004857)’ (Figure S4). It was noteworthy that the category ‘monooxygenase



410 activity' was also found in the enriched GO terms for the expanded gene families in *P.*  
411 *salicina*, which might provide valuable candidate genes for further functional  
412 investigations.

413

## 414 **Conclusions**

415 To our knowledge, this is the first report of the chromosome-level genome assembly  
416 of plums using Illumina and PacBio sequencing platforms with Hi-C technology. The  
417 assembly had a total size of 284.2 Mb, the contig and scaffold N50 reached 1.8 Mb  
418 and 32.3 Mb, respectively. A total of 24,448 protein-coding genes were predicted, and  
419 23,931 genes (97.9%) have been annotated. Phylogenetic analysis indicated that *P.*  
420 *salicina* was closely related to *P. mume* and *P. armeniaca*. Expanded gene families in  
421 *P. salicina* were significantly enriched in several cell-wall related processes.  
422 Remarkably, the *P. salicina*-specific expansion of the xylan biosynthesis-related  
423 DUF579 family provided new insight into the xylan metabolism in plums. Given the  
424 economic and evolutionary importance of *P. salicina*, the genomic data in this study  
425 offer a valuable resource for facilitating plum breeding programs and studying the  
426 genetic basis for agronomic and adaptive divergence of plum and *Prunus* species.

427

## 428 **Availability of supporting data and materials**

429 This Whole Genome Shotgun project has been deposited at DDBJ/ENA/GenBank  
430 under the accession WERZ00000000. The version described in this paper is version  
431 WERZ01000000. The raw sequencing data are available through the NCBI Sequence  
432 Read Archive (SRA) via accession numbers from SRR10233497 to SRR10233505,  
433 via the Project PRJNA574159. The transcriptome data are available through the NCBI  
434 SRA (from SRR10235674 to SRR10235679). The genome data have also been  
435 submitted to Genome Database for Rosaceae (Accession number: tfGDR1044). All  
436 the annotation tables containing results of an analysis of the draft genome are  
437 available at Figshare (<https://doi.org/10.6084/m9.figshare.9973469>).

438

439 **Additional files**

440 **Table S1** Statistics of *P. salicina* genome sequencing data.

441 **Table S2** Statistics of characteristics of PacBio long-reads.

442 **Table S3** Statistics of Hi-C sequencing data.

443 **Table S4** Estimation of the genome size using k-mer analysis.

444 **Table S5** Summary of assembled 8 pseudochromosomes of *P. Salicina*.

445 **Table S6** Summary of the genome assembly of *P. Salicina*.

446 **Table S7** Statistics of mapping ratio in genome.

447 **Table S8** Summary of the transcriptome and their mapping rate on the genome  
448 assembly.

449 **Table S9** Number and density of SNPs in *P. salicina* genome.

450 **Table S10** Assessment of CEGMA.

451 **Table S11** Summary of BUSCO analysis results according to prediction.

452 **Table S12** Detailed classification of repeat sequences.

453 **Table S13** Statistics of functional annotation.

454 **Table S14** Summary of non-coding RNA.

455 **Table S15** List of the Gene ontology terms significantly enriched in the expanded  
456 gene families of *P. salicina*

457 **Figure S1** 17-mer frequency distribution in *P. salicina* genome.

458 **Figure S2** Gene ontology enrichment of the tandemly duplicated genes in *P. salicina*.

459 **Figure S3** Gene ontology enrichment of *P. salicina*-expanded genes.

460 **Figure S4** Gene ontology enrichment of the positively selected genes in *P. salicina*.

461

## 462 **Authors' Contributions**

463 Y.H.H. conceived the study. C.Y.L., C.F. and J.T.W. performed bioinformatics  
464 analysis. W.Z.P., J.J.H. and J.J.P. collected the samples and extracted the DNA. C.Y. L.  
465 and C. F. wrote the manuscript. All authors read and approved the final manuscript.

466

## 467 **Abbreviations**

468 BLAST: Basic Local Alignment Search Tool; BEAST: Bayesian Evolutionary  
469 Analysis Sampling Trees; bp: base pair; BUSCO: Benchmarking Universal  
470 Single-Copy Orthologs; CEGMA: Core Eukaryotic Genes Mapping Approach; CTAB:  
471 cetyltrimethylammonium bromide; EVM: EVIDENCEModeler; Gb: gigabase pair; GO:  
472 Gene Ontology; Hi-C: high-throughput chromosome conformation capture; kb:  
473 kilobase pair; KEGG: Kyoto Encyclopedia of Genes and Genomes; Mb: megabase  
474 pair; miRNA: microRNA; Mya: million years ago; NCBI: National Center for  
475 Biotechnology Information; PacBio: Pacific Biosciences; PAML: phylogenetic  
476 analysis by maximum likelihood; PASA: Program to Assemble Spliced Alignments;  
477 RNA-seq: RNA sequencing; rRNA: ribosomal RNA; SMRT: single-molecule  
478 real-time; SnRNA, small nuclear RNA; SNP: single-nucleotide polymorphism; TRF:  
479 Tandem Repeats Finder; tRNA: transfer RNA.

480

## 481 **Funding**

482 This work was financially supported by The Industry University Research  
483 Collaborative Innovation Major Projects of Guangzhou Science Technology  
484 Innovation Commission (201704020021) and Modern Agricultural Industry  
485 Technology System of Guangdong Province (2016LM1128).

486

## 487 **Competing interests**

488 The authors declare no competing interests.

489

490 **Figure Legends**

491 **Figure 1** The genome and photograph of *P. salicina*. Landscape of the *P. salicina*  
492 genome, comprising 8 pseudochromosomes that cover ~96.56% of assembly (A);  
493 Concentric circles, from outermost to innermost, showing TE percentage (red; B);  
494 gene density (green; C); density of duplicates resulted from tandem duplications (blue;  
495 D); (E) photograph of *P. salicina*.

496

497 **Figure 2** Evolution of *P. salicina* genome and orthogroups. (A) The phylogeny,  
498 divergence time and orthogroup expansions/contractions for 17 rosids species. The  
499 tree was constructed by maximum likelihood method using 341 single copy  
500 orthogroups. All nodes have 100% bootstrap support. Divergence time was estimated  
501 on a basis of three calibration points (blue circles). Blue bar indicates 95% HPD  
502 (highest posterior density) for each node. The numbers in red and green indicate the  
503 numbers of orthogroups that have expanded and contracted along particular branches,  
504 respectively. (B) The comparison of genes among 17 rosids. The grey bars indicate  
505 the genes belonging to 9,616 rosids-shared orthogroups in each of 17 rosids. The grey  
506 + green bars indicate the genes belonging to 10,447 rosales-shared orthogroups in  
507 each of 16 rosales. The grey + green + pink bars indicate the genes belonging to  
508 11,098 Rosaceae-shared orthogroups in each of 15 Rosaceae. The grey + green + pink  
509 + yellow bars indicate the genes belonging to 13,963 rosaceae-shared orthogroups in  
510 each of ten Amygdaloideae. The grey + green + pink + yellow + blue bars indicate the  
511 genes belonging to 15,512 *Prunus*-shared orthogroups in each of seven *Prunus*  
512 species. The red and stripe bars indicate the genes in species-specific orthogroups and  
513 unassigned genes, respectively. The white bars indicate the remaining genes for each  
514 genome.

515

516 **Figure 3** Chromosome-level collinearity patterns between *P. salicina*, *P. mume* and *P.*  
517 *armeniaca* (A) and between *P. salicina*, *P. avium* and *P. dulcis* (B). The numbers  
518 indicate the pseudochromosome order generated from the original genome sequence.

519 The pseudochromosome 1 and 8 in *P. avium* and *P. dulcis* are reversed. Each gray line  
520 represents one block. The inverted regions are highlighted with brown color.

521 .

522 **Figure 4** The significant expansion of the DUF579 family members in *P. salicina*. (A)  
523 Phylogenetic tree of the DUF579 proteins from *P. salicina* (red circle), *P. persica*  
524 (hollow inverted triangle), *P. mume* (solid triangle), *P. armeniaca* (hollow diamond), *P.*  
525 *dulcis* (solid diamond) and *A. thaliana* (solid square). (B) The summary of the  
526 numbers of clade members in DUF579 family.

527

528 **Table 1** Summary of genome assembly and annotation for *P. salicina*

529

|                                                          | <b>Number or percentage</b> |
|----------------------------------------------------------|-----------------------------|
| <b>Assembly feature</b>                                  |                             |
| Total length of scaffolds (bp)                           | 284,209,110                 |
| Number of scaffolds                                      | 75                          |
| N50 of scaffolds (bp)                                    | 32,324,625                  |
| Total length of contigs (bp)                             | 284,189,410                 |
| Number of contigs                                        | 272                         |
| N50 of contigs (bp)                                      | 1,777,944                   |
| Mapping rate by reads from short-insert libraries        | 96.93%                      |
| Assembled CEGs                                           | 94.35%                      |
| Completely assembled CEGs                                | 92.34%                      |
| Complete BUSCOs                                          | 95.7%                       |
| Complete and single-copy BUSCOs                          | 86.5%                       |
| Complete and duplicated BUSCOs                           | 9.2%                        |
| Fragmented BUSCOs                                        | 1.3%                        |
| Missing BUSCOs                                           | 3.0%                        |
| RNA-Seq evaluation                                       | 92.44%-95.25%               |
| <b>Genome annotation</b>                                 |                             |
| Percentage of transposable elements (TE)                 | 48.28%                      |
| Percentage of long terminal repeat (LTR) retrotransposon | 42.1%                       |
| No. of predicted protein-coding genes                    | 24,448                      |
| No. of genes assigned to pseudochromosomes               | 24,209 (99.0%)              |
| No. of genes annotated to public database                | 23,930 (97.9%)              |
| No. of genes annotated to GO database                    | 13,484 (55.2%)              |
| No. of genes duplicated by tandem duplications           | 2,384(9.8%)                 |

530

531 **Table 2** Statistics of predicted protein-coding genes.

|                           | Gene set                    | Number  | Average transcript length (bp) | Average CDS length (bp) | Average exons per gene | Average exons length (bp) | Average intron length (bp) |
|---------------------------|-----------------------------|---------|--------------------------------|-------------------------|------------------------|---------------------------|----------------------------|
| <i>De novo</i> prediction | Augustus                    | 23,592  | 2,627.71                       | 1167.83                 | 4.80                   | 243.43                    | 384.45                     |
|                           | GlimmerHMM                  | 39,985  | 5,450.51                       | 747.07                  | 3.14                   | 238.12                    | 2200.59                    |
|                           | SNAP                        | 24,882  | 2,876.50                       | 728.45                  | 4.22                   | 172.73                    | 667.66                     |
|                           | Geneid                      | 33,780  | 3,829.40                       | 899.99                  | 4.44                   | 202.74                    | 851.78                     |
|                           | Genscan                     | 21,882  | 8,251.09                       | 1355.87                 | 6.34                   | 213.98                    | 1292.13                    |
| Homolog prediction        | <i>Pyrus bretschneideri</i> | 20,265  | 3,119.83                       | 1356.17                 | 4.74                   | 286.35                    | 472.06                     |
|                           | <i>Malus domestica</i>      | 20,010  | 2,920.17                       | 1361.30                 | 4.65                   | 292.56                    | 426.72                     |
|                           | <i>Prunus mume</i>          | 23,064  | 3,038.66                       | 1346.19                 | 4.78                   | 281.67                    | 447.84                     |
|                           | <i>Prunus persica</i>       | 28,915  | 2,296.51                       | 1099.56                 | 4.06                   | 270.55                    | 390.64                     |
|                           | <i>Arabidopsis thaliana</i> | 28,284  | 2,071.73                       | 973.28                  | 3.67                   | 265.51                    | 412.07                     |
|                           | <i>Fragaria vesca</i>       | 22,927  | 2,994.24                       | 1380.61                 | 4.59                   | 300.66                    | 449.24                     |
| RNA-seq                   | <i>Prunus avium</i>         | 22,715  | 3,077.20                       | 1351.28                 | 4.74                   | 284.86                    | 461.03                     |
|                           | PASA                        | 196,264 | 3,913.86                       | 1008.68                 | 5.16                   | 195.60                    | 698.88                     |
|                           | Transcripts                 | 42,450  | 11,076.28                      | 2360.92                 | 6.85                   | 344.83                    | 1490.64                    |
|                           | EVM                         | 27,981  | 2,736.70                       | 1061.73                 | 4.57                   | 232.52                    | 469.68                     |
|                           | PASA-update*                | 27,594  | 2,784.15                       | 1092.82                 | 4.64                   | 235.59                    | 464.83                     |
|                           | Final set*                  | 24,448  | 2,988.45                       | 1157.42                 | 4.97                   | 233.09                    | 461.72                     |

532 \* UTR regions were contained

533

## 534 **References**

- 535 1. Roussos PA, Efstathios N, Intidhar B, Denaxa N-K and Tsafouros A. Plum (*Prunus*  
536 *domestica* L. and *P. salicina* Lindl.). In: Monique Simmonds VRP, editor. Nutritional  
537 Composition of Fruit Cultivars. Elsevier; 2016. p. 639 - 666.
- 538 2. Topp BL, Russell DM, Neumüller M, Dalbó MA and Liu W. Plum. In: Maria Luisa Badenes  
539 DHB, editor. Fruit Breeding. Springer; 2012. p. 571-621.
- 540 3. Hartmann W and Neumüller M. Plum breeding. In: Shri Mohan Jain PMP, editor. Breeding  
541 Plantation Tree Crops: Temperate Species. Springer; 2009. p. 161-231.
- 542 4. Okie W and Hancock J. Plums. In: Hancock JF, editor. Temperate Fruit Crop Breeding.  
543 Springer Science & Business Media; 2008. p. 337-358.
- 544 5. Esmenjaud D and Dirlewanger E. Plum. In: Kole C, editor. Genome Mapping and Molecular  
545 Breeding in Plants. Springer; 2007. p. 119-135.
- 546 6. Guerra M and Rodrigo J. Japanese plum pollination: A review. *SCI Hortic-Amsterdam*  
547 *2015*;**197**:674-686.
- 548 7. Rennie EA and Scheller HV. Xylan biosynthesis. *Curr Opin Biotech* 2014;**26**:100-107.
- 549 8. Brummell DA and Schröder R. Xylan metabolism in primary cell walls. *NZ J Forestry Sci.*  
550 *2009*;**39**:125-143.
- 551 9. Renard CMGC and Ginies C. Comparison of the cell wall composition for flesh and skin  
552 from five different plums. *Food Chem* 2009;**114**(3):1042-1049.
- 553 10. Arcaño YD, Garc á ODV, Mandelli D, Carvalho WA and Pontes LAM. Xylitol: A review on  
554 the progress and challenges of its production by chemical route. *Catal Today* 2020;**344**:2-14.
- 555 11. Aranzana MJ, Decroocq V, Dirlewanger E, Eduardo I, Gao ZS, Gasic K, et al. *Prunus*  
556 genetics and applications after *de novo* genome sequencing: achievements and prospects.  
557 *Hortic Res* 2019;**6** (1):1-25.
- 558 12. Velasco R, Zharkikh A, Affourtit J, Dhingra A, Cestaro A, Kalyanaraman A, et al. The  
559 genome of the domesticated apple (*Malus* × *domestica* Borkh.). *Nat Genet* 2010;**42**  
560 (10):833-839.
- 561 13. Chen X, Li S, Zhang D, Han M, Jin X, Zhao C, et al. Sequencing of a wild apple (*Malus*  
562 *baccata*) genome unravels the differences between cultivated and wild apple species  
563 regarding disease resistance and cold tolerance. *G3: Genes, Genomes, Genet* 2019;**9**  
564 (7):2051-2060.
- 565 14. Zhang L, Hu J, Han X, Li J, Gao Y, Richards CM, et al. A high-quality apple genome  
566 assembly reveals the association of a retrotransposon and red fruit colour. *Nat Commun*  
567 *2019*;**10** (1):1-13.
- 568 16. Verde I, Abbott AG, Scalabrin S, Jung S, Shu S, Marroni F, et al. The high-quality draft  
569 genome of peach (*Prunus persica*) identifies unique patterns of genetic diversity,  
570 domestication and genome evolution. *Nat Genet* 2013;**45**(5):487-494.
- 571 17. Linsmith G, Rombauts S, Montanari S, Deng CH, Celton J-M, Guérif P, et al.



- 572 Pseudo-chromosome-length genome assembly of a double haploid “Bartlett” pear (*Pyrus*  
573 *communis* L.) GigaScience 2019; 8 (12):giz138.
- 574 18. Wu J, Wang Z, Shi Z, Zhang S, Ming R, Zhu S, et al. The genome of the pear (*Pyrus*  
575 *bretschneideri* Rehd.). Genome Res 2013;**23**(2):396-408.
- 576 19. Chagné D, Crowhurst RN, Pindo M, Thrimawithana A, Deng C, Ireland H, et al. The draft  
577 genome sequence of European pear (*Pyrus communis* L. ‘Bartlett’). PloS One 2014;**9**  
578 (4):e92644.
- 579 20. Dong X, Wang Z, Tian L, Zhang Y, Qi D, Huo H, et al. *De novo* assembly of a wild pear  
580 (*Pyrus betuleafolia*) genome. Plant Biotechnol J 2020;**18**(2):581-595
- 581 21. Shulaev V, Sargent DJ, Crowhurst RN, Mockler TC, Folkerts O, Delcher AL, et al. The  
582 genome of woodland strawberry (*Fragaria vesca*). Nat Genet 2011;**43**(2):109-116.
- 583 22. Edger PP, Poorten TJ, VanBuren R, Hardigan MA, Colle M, McKain MR, et al. Origin and  
584 evolution of the octoploid strawberry genome. Nat Genet 2019;**51**(3):541-547.
- 585 23. Alioto T, Alexiou KG, Bardil A, Barteri F, Castanera R, Cruz F, et al. Transposons played a  
586 major role in the diversification between the closely related almond and peach genomes:  
587 Results from the almond genome sequence. Plant J 2020;**101**(2):455-472.
- 588 24. Sánchez-Pérez R, Pavan S, Mazzeo R, Moldovan C, Cigliano RA, Del Cueto J, et al.  
589 Mutation of a bHLH transcription factor allowed almond domestication. Science 2019; **364**  
590 (6445):1095-1098.
- 591 25. VanBuren R, Bryant D, Bushakra JM, Vining KJ, Edger PP, Rowley ER, et al. The genome of  
592 black raspberry (*Rubus occidentalis*). Plant J 2016;**87**(6):535-547.
- 593 26. Shirasawa K, Isuzugawa K, Ikenaga M, Saito Y, Yamamoto T, Hirakawa H, et al. The  
594 genome sequence of sweet cherry (*Prunus avium*) for use in genomics-assisted breeding.  
595 DNA Res 2017;**24**(5):499-508.
- 596 27. Wang J, Liu W, Zhu D, Hong P, Zhang S, Xiao S, et al. Chromosome-scale genome assembly  
597 of sweet cherry (*Prunus avium* L.) cv. Tieton obtained using long-read and Hi-C sequencing.  
598 Hort Res 2020;**7** (1):1-11.
- 599 28. Jiang F, Zhang J, Wang S, Yang L, Luo Y, Gao S, et al. The apricot (*Prunus armeniaca* L.)  
600 genome elucidates Rosaceae evolution and beta-carotenoid synthesis. Hort Res 2019;**6**  
601 (1):1-12.
- 602 29. Campoy JA, Sun H, Goel M, Jiao W-B, Folz-Donahue K, Kukat C, et al. Chromosome-level  
603 and haplotype-resolved genome assembly enabled by high-throughput single-cell sequencing  
604 of gamete genomes. BioRxiv. 2020.
- 605 30. Jiang S, An H, Xu F and Zhang X. Chromosome-level genome assembly and annotation of  
606 the loquat (*Eriobotrya japonica*) genome. GigaScience 2020;**9**(3):giaa015.
- 607 31. Zhang Q, Chen W, Sun L, Zhao F, Huang B, Yang W, et al. The genome of *Prunus mume*.  
608 Nat Commun 2012;**3**:1318.
- 609 32. Lodhi MA, Ye G-N, Weeden NF and Reisch BI. A simple and efficient method for DNA  
610 extraction from grapevine cultivars and *Vitis* species. Plant Mol Biol Rep. 1994;**12** (1):6-13.

- 611 33. Wingett S, Ewels P, Furlan-Magaril M, Nagano T, Schoenfelder S, Fraser P, et al. HiCUP:  
612 pipeline for mapping and processing Hi-C data. *F1000Res* 2015;**4**:1310.
- 613 34. Luo R, Liu B, Xie Y, Li Z, Huang W, Yuan J, et al. SOAPdenovo2: an empirically improved  
614 memory-efficient short-read *de novo* assembler. *Gigascience* 2012;**1** (1):2047-217X-1-18.
- 615 35. Chin C-S, Peluso P, Sedlazeck FJ, Nattestad M, Concepcion GT, Clum A, et al. Phased  
616 diploid genome assembly with single-molecule real-time sequencing. *Nat Methods* 2016;**13**  
617 (12):1050-1054.
- 618 36. Chin C-S, Alexander DH, Marks P, Klammer AA, Drake J, Heiner C, et al. Nonhybrid,  
619 finished microbial genome assemblies from long-read SMRT sequencing data. *Nat Methods*  
620 2013;**10**(6):563-569.
- 621 37. Walker BJ, Abeel T, Shea T, Priest M, Abouelliel A, Sakthikumar S, et al. Pilon: an integrated  
622 tool for comprehensive microbial variant detection and genome assembly improvement. *PLoS*  
623 *One* 2014;**9** (11):e112963.
- 624 38. Roach MJ, Schmidt SA and Borneman ARJB. Purge Haplotigs: allelic contig reassignment  
625 for third-gen diploid genome assemblies. *BMC Bioinformatics* 2018;**19** (1):460.
- 626 39. Li H and Durbin R. Fast and accurate short read alignment with Burrows-Wheeler transform.  
627 *Bioinformatics* 2009;**25** (14):1754-1760.
- 628 40. Burton JN, Adey A, Patwardhan RP, Qiu R, Kitzman JO and Shendure J. Chromosome-scale  
629 scaffolding of *de novo* genome assemblies based on chromatin interactions. *Nat Biotechnol*  
630 2013;**31** (12):1119-1125.
- 631 41. Robinson JT, Turner D, Durand NC, Thorvaldsdottir H, Mesirov JP and Aiden EL. Juicebox.  
632 js provides a cloud-based visualization system for Hi-C data. *Cell Syst* 2018;**6**(2):256-258.  
633 e1.
- 634 42. Kim D, Langmead B and Salzberg SL. HISAT: a fast spliced aligner with low memory  
635 requirements. *Nat Methods* 2015;**12** (4):357-360.
- 636 43. Parra G, Bradnam K and Korf I. CEGMA: a pipeline to accurately annotate core genes in  
637 eukaryotic genomes. *Bioinformatics* 2007;**23** (9):1061-1067.
- 638 44. Simão FA, Waterhouse RM, Ioannidis P, Kriventseva EV and Zdobnov EM. BUSCO:  
639 assessing genome assembly and annotation completeness with single-copy orthologs.  
640 *Bioinformatics* 2015;**31**(19):3210-3212.
- 641 45. Tarailo-Graovac M and Chen N. Using RepeatMasker to identify repetitive elements in  
642 genomic sequences. *Curr Protoc Bioinf* 2009;**25** (1):4-10.
- 643 46. Jurka J, Kapitonov VV, Pavlicek A, Klonowski P, Kohany O and Walichiewicz J. Repbase  
644 Update, a database of eukaryotic repetitive elements. *Cytogenet Genome Res* 2005;**110**  
645 (1-4):462-467.
- 646 47. Price AL, Jones NC and Pevzner PA. *De novo* identification of repeat families in large  
647 genomes. *Bioinformatics* 2005;**21** (suppl\_1):i351-i358.
- 648 48. Xu Z and Wang H. LTR\_FINDER: an efficient tool for the prediction of full-length LTR  
649 retrotransposons. *Nucleic Acids Res* 2007;**35** (suppl\_2):W265-W268.

- 650 49. Benson G. Tandem repeats finder: a program to analyze DNA sequences. *Nucleic Acids Res*  
651 1999;**27** (2):573-580.
- 652 50. Gertz EM, Yu Y-K, Agarwala R, Schäffer AA and Altschul SF. Composition-based statistics  
653 and translated nucleotide searches: improving the TBLASTN module of BLAST. *BMC Biol*  
654 2006;**4** (1):1-14.
- 655 51. Birney E, Clamp M and Durbin R. GeneWise and genomewise. *Genome Res* 2004;**14**  
656 (5):988-995.
- 657 52. Stanke M, Steinkamp R, Waack S and Morgenstern B. AUGUSTUS: a web server for gene  
658 finding in eukaryotes. *Nucleic Acids Res* 2004;**32** (suppl\_2):W309-W312.
- 659 53. Majoros WH, Pertea M and Salzberg SL. TigrScan and GlimmerHMM: two open source ab  
660 initio eukaryotic gene-finders. *Bioinformatics* 2004;**20** (16):2878-2879.
- 661 54. Korf I. Gene finding in novel genomes. *BMC Bioinf* 2004;**5** (1):59.
- 662 55. Blanco E, Parra G and Guigó R. Using geneid to identify genes. *Curr Protoc Bioinf* 2007;**18**  
663 (1):4.3. 1-4.3. 28.
- 664 56. Burge C and Karlin S. Prediction of complete gene structures in human genomic DNA. *J Mol*  
665 *Biol* 1997;**268** (1):78-94.
- 666 57. Pertea M, Pertea GM, Antonescu CM, Chang T-C, Mendell JT and Salzberg SL. StringTie  
667 enables improved reconstruction of a transcriptome from RNA-seq reads. *Nat Biotechnol*  
668 2015;**33**(3):290-295.
- 669 58. Haas BJ, Papanicolaou A, Yassour M, Grabherr M, Blood PD, Bowden J, et al. *De novo*  
670 transcript sequence reconstruction from RNA-seq using the Trinity platform for reference  
671 generation and analysis. *Nat Protoc* 2013;**8** (8):1494-1512.
- 672 59. Haas BJ, Salzberg SL, Zhu W, Pertea M, Allen JE, Orvis J, et al. Automated eukaryotic gene  
673 structure annotation using EVIDENCEModeler and the Program to Assemble Spliced  
674 Alignments. *Genome Biol* 2008;**9** (1):R7.
- 675 60. Bairoch A and Apweiler R. The SWISS-PROT protein sequence database and its supplement  
676 TrEMBL in 2000. *Nucleic Acids Res* 2000;**28** (1):45-48.
- 677 61. Mulder N and Apweiler R. InterPro and InterProScan: tools for protein sequence classification  
678 and comparison. *Methods Mol Biol* 2007; **396**:59-70.
- 679 62. Finn RD, Bateman A, Clements J, Coggill P, Eberhardt RY, Eddy SR, et al. Pfam: the protein  
680 families database. *Nucleic Acids Res* 2013;**42** (D1):D222-D230.
- 681 63. Jones P, Binns D, Chang H-Y, Fraser M, Li W, McAnulla C, et al. InterProScan 5:  
682 genome-scale protein function classification. *Bioinformatics* 2014;**30** (9):1236-1240.
- 683 64. Kanehisa M and Goto S. KEGG: kyoto encyclopedia of genes and genomes. *Nucleic Acids*  
684 *Res* 2000;**28** (1):27-30.
- 685 65. Lowe TM and Eddy SR. tRNAscan-SE: a program for improved detection of transfer RNA  
686 genes in genomic sequence. *Nucleic Acids Res* 1997;**25** (5):955-964.
- 687 66. Griffiths-Jones S, Bateman A, Marshall M, Khanna A and Eddy SR. Rfam: an RNA family  
688 database. *Nucleic Acids Res* 2003;**31**(1):439-441.

- 689 67. Nawrocki EP and Eddy SR. Infernal 1.1: 100-fold faster RNA homology searches.  
690 Bioinformatics 2013;**29** (22):2933-2935.
- 691 68. Emms DM and Kelly S. OrthoFinder: solving fundamental biases in whole genome  
692 comparisons dramatically improves orthogroup inference accuracy. Genome Biol 2015;**16**  
693 (1):157.
- 694 69. Katoh K and Standley DM. MAFFT multiple sequence alignment software version 7:  
695 improvements in performance and usability. Mol Biol Evol 2013;**30** (4):772-780.
- 696 70. Nguyen L-T, Schmidt HA, Von Haeseler A and Minh BQ. IQ-TREE: a fast and effective  
697 stochastic algorithm for estimating maximum-likelihood phylogenies. Mol Biol Evol 2015;**32**  
698 (1):268-274.
- 699 71. Drummond AJ and Rambaut A. BEAST: Bayesian evolutionary analysis by sampling trees.  
700 BMC Evol Biol 2007;**7** (1):1-8.
- 701 72. Xiang Y, Huang C-H, Hu Y, Wen J, Li S, Yi T, et al. Evolution of Rosaceae fruit types based  
702 on nuclear phylogeny in the context of geological times and genome duplication. Mol Biol  
703 Evol 2017;**34** (2):262-281.
- 704 73. De Bie T, Cristianini N, Demuth JP and Hahn MW. CAFE: a computational tool for the study  
705 of gene family evolution. Bioinformatics 2006;**22** (10):1269-1271.
- 706 74. Tang H. Multiple collinearity scan—mcsan. 2009.
- 707 75. Yang Z. PAML 4: phylogenetic analysis by maximum likelihood. Mol Biol Evol  
708 2007;**24**(8):1586-1591.
- 709 76. Alexa A and Rahnenführer J. Gene set enrichment analysis with topGO. Bioconductor  
710 Improv. 2009;27.
- 711 77. Ernst AM, Jekat SB, Zielonka S, Müller B, Neumann U, Rüping B, et al. Sieve element  
712 occlusion (SEO) genes encode structural phloem proteins involved in wound sealing of the  
713 phloem. P Natl Acad Sci USA 2012;**109** (28): E1980-E1989.
- 714 78. Temple H, Mortimer JC, Tryfona T, Yu X, Lopez - Hernandez F, Sorieul M, et al. Two  
715 members of the DUF 579 family are responsible for arabinogalactan methylation in  
716 Arabidopsis. Plant Direct 2019;**3** (2):e00117.
- 717 79. Jensen JK, Kim H, Cocuron JC, Orler R, Ralph J and Wilkerson CG. The DUF579 domain  
718 containing proteins IRX15 and IRX15-L affect xylan synthesis in Arabidopsis. Plant J  
719 2011;**66** (3):387-400.
- 720 80. Brown D, Wightman R, Zhang Z, Gomez LD, Atanassov I, Bukowski JP, et al. Arabidopsis  
721 genes IRREGULAR XYLEM (IRX15) and IRX15L encode DUF579 - containing proteins  
722 that are essential for normal xylan deposition in the secondary cell wall. Plant J 2011;**66**  
723 (3):401-413.
- 724 81. Ma L and Li G. FAR1-related sequence (FRS) and FRS-related factor (FRF) family proteins  
725 in *Arabidopsis* growth and development. Front Plant Sci 2018; **9**:692.
- 726

Figure 1

[Click here to access/download;Figure;Figure 1-ok.tif](#)

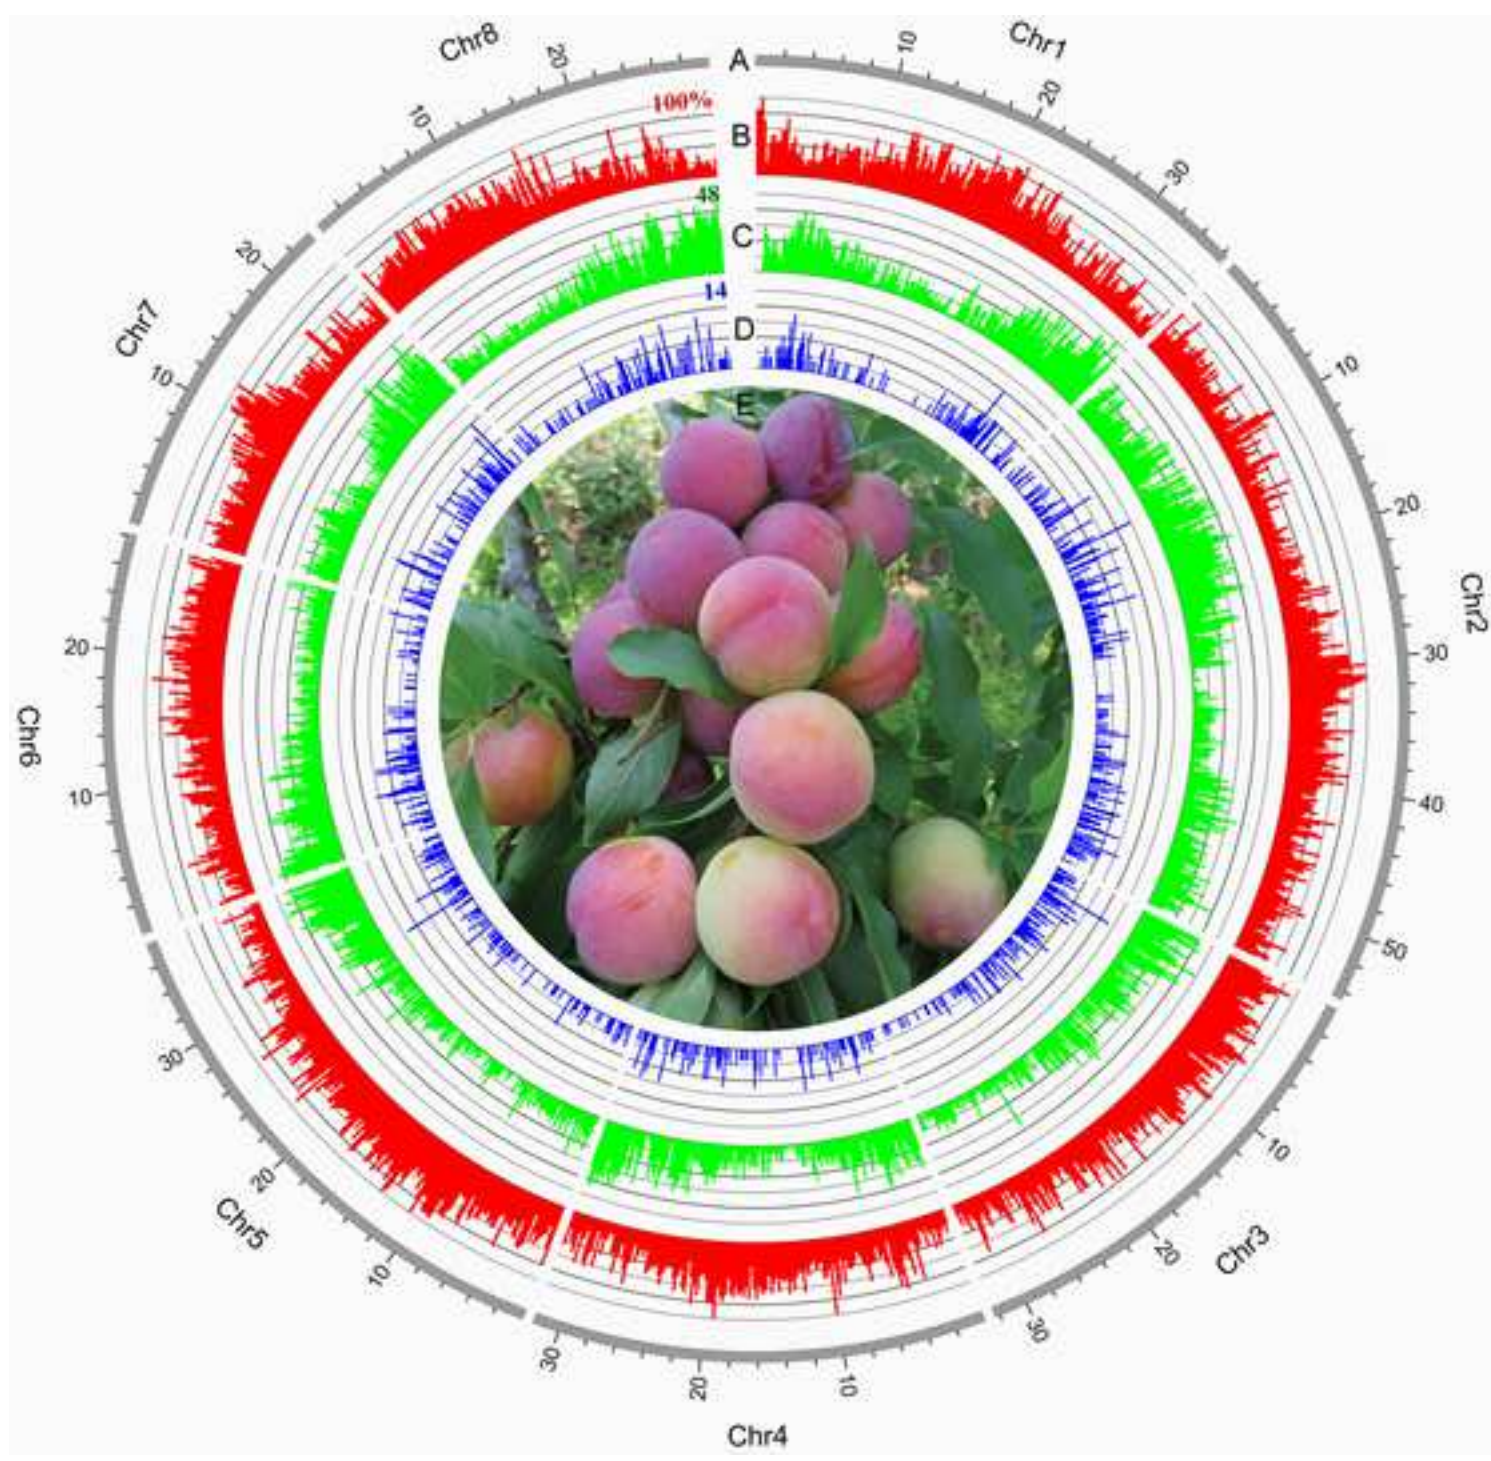

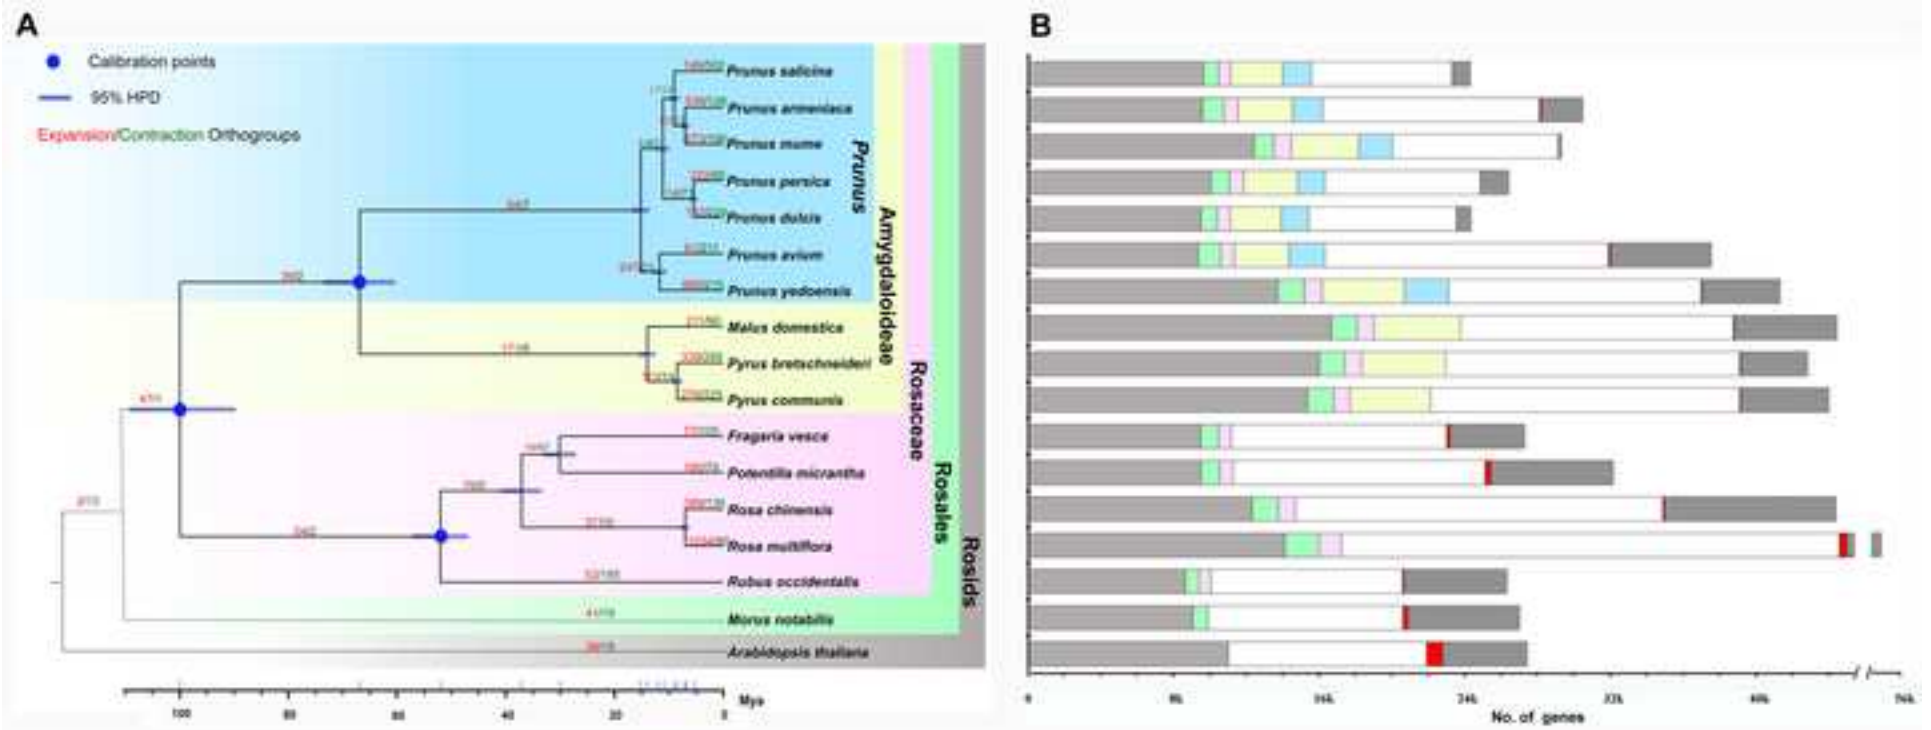

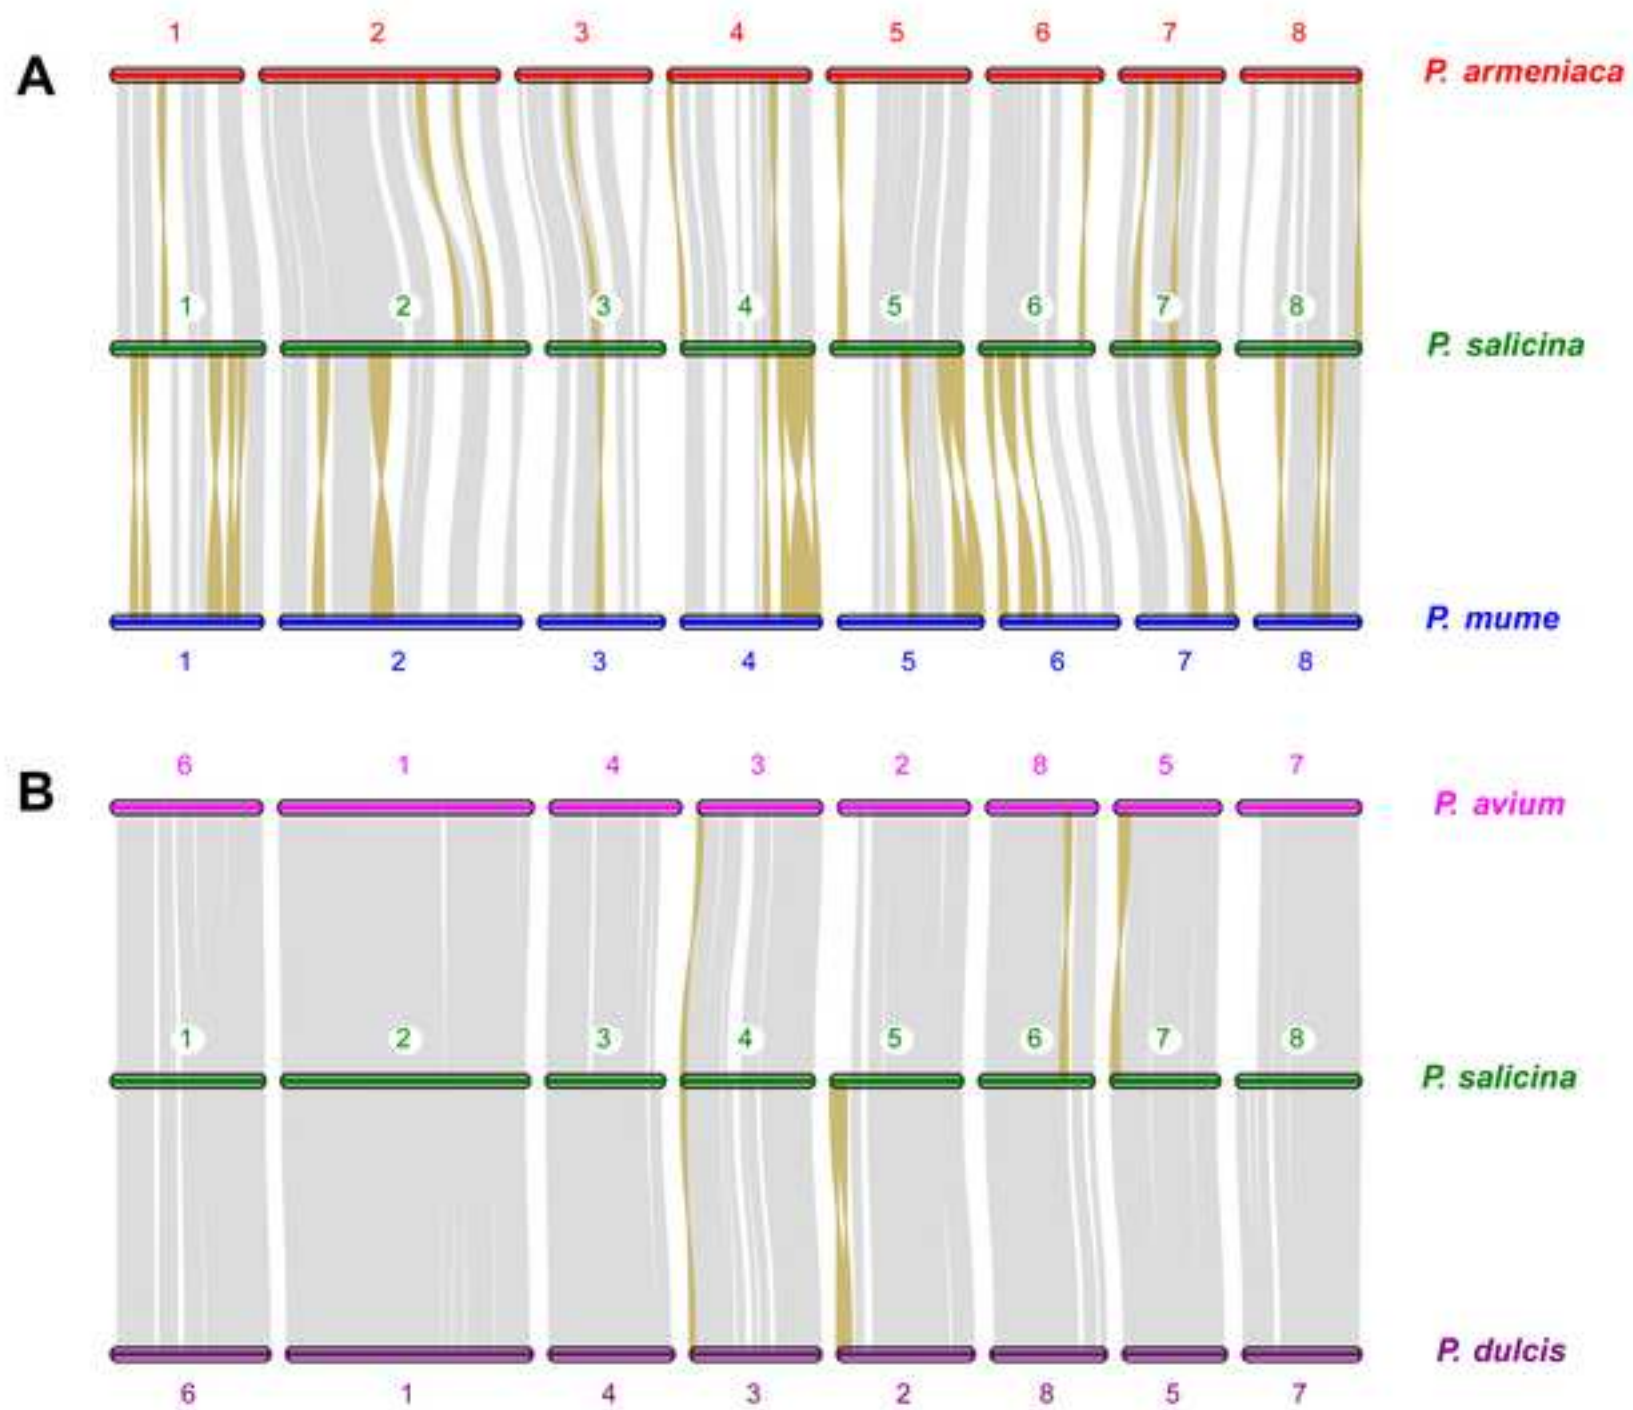

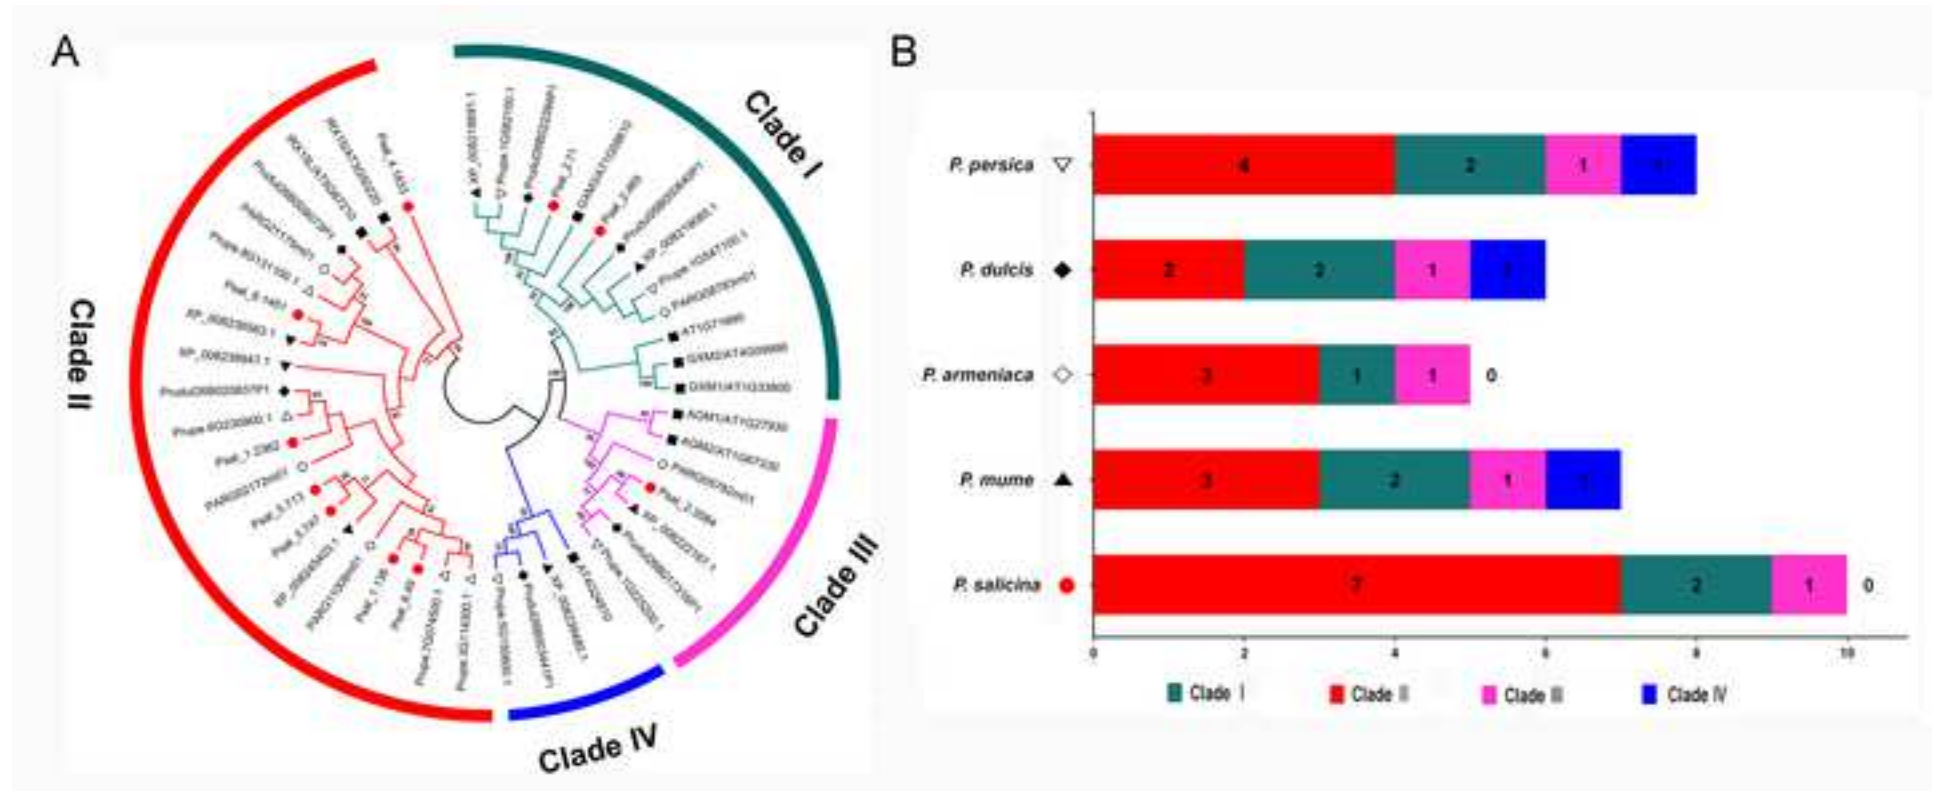





Click here to access/download  
**Supplementary Material**  
Supplementary Tables.xlsx



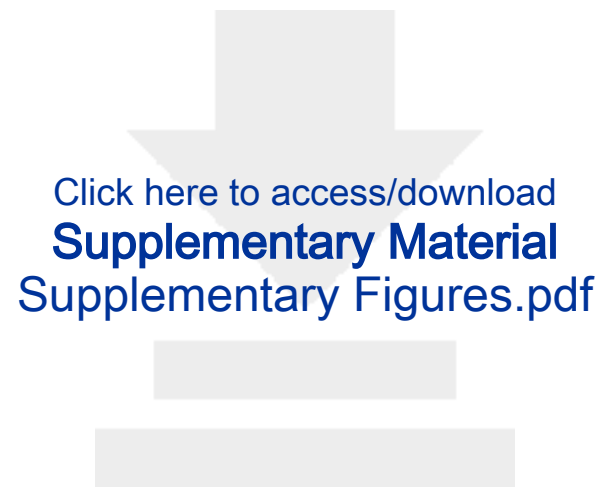

Supplement: giaa130_giga-d-20-00195_revision_1.pdf [file giaa130_giga-d-20-00195_revision_1.pdf]
