# Supplementary material for: Chromosome-level draft genome of a diploid plum (Prunus salicina)
Source: PubMed Central journal article supplement (PMC7727024; doi:10.1093/gigascience/giaa130), 2020-12-10

|                                                      |                                                                                                                                                                                                                                                                                                                                                                                                                                                                                                                                                                                                                                                                                                                                                                                                                                                                                                                                                                                                                                                                                                                                                                                                                                                                                                                                                                                                                                                                                                                                                                                                                                                                                                                                                                                             |             |
|------------------------------------------------------|---------------------------------------------------------------------------------------------------------------------------------------------------------------------------------------------------------------------------------------------------------------------------------------------------------------------------------------------------------------------------------------------------------------------------------------------------------------------------------------------------------------------------------------------------------------------------------------------------------------------------------------------------------------------------------------------------------------------------------------------------------------------------------------------------------------------------------------------------------------------------------------------------------------------------------------------------------------------------------------------------------------------------------------------------------------------------------------------------------------------------------------------------------------------------------------------------------------------------------------------------------------------------------------------------------------------------------------------------------------------------------------------------------------------------------------------------------------------------------------------------------------------------------------------------------------------------------------------------------------------------------------------------------------------------------------------------------------------------------------------------------------------------------------------|-------------|
| <b>Manuscript Number:</b>                            | GIGA-D-20-00195R2                                                                                                                                                                                                                                                                                                                                                                                                                                                                                                                                                                                                                                                                                                                                                                                                                                                                                                                                                                                                                                                                                                                                                                                                                                                                                                                                                                                                                                                                                                                                                                                                                                                                                                                                                                           |             |
| <b>Full Title:</b>                                   | The chromosome-level draft genome of a diploid plum ( <i>Prunus salicina</i> )                                                                                                                                                                                                                                                                                                                                                                                                                                                                                                                                                                                                                                                                                                                                                                                                                                                                                                                                                                                                                                                                                                                                                                                                                                                                                                                                                                                                                                                                                                                                                                                                                                                                                                              |             |
| <b>Article Type:</b>                                 | Data Note                                                                                                                                                                                                                                                                                                                                                                                                                                                                                                                                                                                                                                                                                                                                                                                                                                                                                                                                                                                                                                                                                                                                                                                                                                                                                                                                                                                                                                                                                                                                                                                                                                                                                                                                                                                   |             |
| <b>Funding Information:</b>                          | The Industry University Research Collaborative Innovation Major Projects of Guangzhou Science Technology Innovation Commission (201704020021)                                                                                                                                                                                                                                                                                                                                                                                                                                                                                                                                                                                                                                                                                                                                                                                                                                                                                                                                                                                                                                                                                                                                                                                                                                                                                                                                                                                                                                                                                                                                                                                                                                               | Dr Yehua He |
|                                                      | Guangdong Key Laboratory of Innovation Method and Decision Management System (CN) (2016LM1128)                                                                                                                                                                                                                                                                                                                                                                                                                                                                                                                                                                                                                                                                                                                                                                                                                                                                                                                                                                                                                                                                                                                                                                                                                                                                                                                                                                                                                                                                                                                                                                                                                                                                                              | Dr Yehua He |
| <b>Abstract:</b>                                     | <p><b>Background:</b> Plums are one of the most economically important Rosaceae fruit crops, and contain dozens of species distributed across the world. Until now, only limited genomic information is available for the genetic studies and breeding programs of plums. <i>Prunus salicina</i>, an important diploid plum species, plays a predominant role in modern commercial plums production. Here we selected <i>P. salicina</i> for whole-genome sequencing and presented a chromosome-level genome assembly through the combination of PacBio sequencing, Illumina sequencing and Hi-C technology.</p> <p><b>Findings:</b> The assembly had a total size of 284.2 Mb, with contig N50 of 1.8Mb and Scaffold N50 of 32.3 Mb. 96.56% of the assembled sequences were anchored onto eight pseudochromosomes and a total of 24,448 protein-coding genes were identified. Phylogenetic analysis showed that <i>P. salicina</i> had closer relationship with <i>P. mume</i> and <i>P. armeniaca</i>, with <i>P. salicina</i> diverging from their common ancestor approximately 9.05 million years ago (Mya). 146 gene families were expanded during <i>P. salicina</i> evolution, and some cell wall-related GO terms were significantly enriched. It was noteworthy that members in the DUF579 family, a new class involved in xylan biosynthesis, were significantly expanded in <i>P. salicina</i>, which provided new insight into the xylan metabolism in plums.</p> <p><b>Conclusions:</b> We constructed the first high-quality chromosome-level plum genome using PacBio, Illumina and Hi-C technologies. This work provides a valuable resource for facilitating plum breeding programs and studying the genetic diversity mechanisms of plums and <i>Prunus</i> species.</p> |             |
| <b>Corresponding Author:</b>                         | Yehua He<br>Soth China Agricultural University<br>Guangzhou, Guangdong Province CHINA                                                                                                                                                                                                                                                                                                                                                                                                                                                                                                                                                                                                                                                                                                                                                                                                                                                                                                                                                                                                                                                                                                                                                                                                                                                                                                                                                                                                                                                                                                                                                                                                                                                                                                       |             |
| <b>Corresponding Author Secondary Information:</b>   |                                                                                                                                                                                                                                                                                                                                                                                                                                                                                                                                                                                                                                                                                                                                                                                                                                                                                                                                                                                                                                                                                                                                                                                                                                                                                                                                                                                                                                                                                                                                                                                                                                                                                                                                                                                             |             |
| <b>Corresponding Author's Institution:</b>           | Soth China Agricultural University                                                                                                                                                                                                                                                                                                                                                                                                                                                                                                                                                                                                                                                                                                                                                                                                                                                                                                                                                                                                                                                                                                                                                                                                                                                                                                                                                                                                                                                                                                                                                                                                                                                                                                                                                          |             |
| <b>Corresponding Author's Secondary Institution:</b> |                                                                                                                                                                                                                                                                                                                                                                                                                                                                                                                                                                                                                                                                                                                                                                                                                                                                                                                                                                                                                                                                                                                                                                                                                                                                                                                                                                                                                                                                                                                                                                                                                                                                                                                                                                                             |             |
| <b>First Author:</b>                                 | Chaoyang Liu                                                                                                                                                                                                                                                                                                                                                                                                                                                                                                                                                                                                                                                                                                                                                                                                                                                                                                                                                                                                                                                                                                                                                                                                                                                                                                                                                                                                                                                                                                                                                                                                                                                                                                                                                                                |             |
| <b>First Author Secondary Information:</b>           |                                                                                                                                                                                                                                                                                                                                                                                                                                                                                                                                                                                                                                                                                                                                                                                                                                                                                                                                                                                                                                                                                                                                                                                                                                                                                                                                                                                                                                                                                                                                                                                                                                                                                                                                                                                             |             |
| <b>Order of Authors:</b>                             | Chaoyang Liu                                                                                                                                                                                                                                                                                                                                                                                                                                                                                                                                                                                                                                                                                                                                                                                                                                                                                                                                                                                                                                                                                                                                                                                                                                                                                                                                                                                                                                                                                                                                                                                                                                                                                                                                                                                |             |
|                                                      | Chao Feng                                                                                                                                                                                                                                                                                                                                                                                                                                                                                                                                                                                                                                                                                                                                                                                                                                                                                                                                                                                                                                                                                                                                                                                                                                                                                                                                                                                                                                                                                                                                                                                                                                                                                                                                                                                   |             |
|                                                      | Weizhuo Peng                                                                                                                                                                                                                                                                                                                                                                                                                                                                                                                                                                                                                                                                                                                                                                                                                                                                                                                                                                                                                                                                                                                                                                                                                                                                                                                                                                                                                                                                                                                                                                                                                                                                                                                                                                                |             |
|                                                      | Jingjing Hao                                                                                                                                                                                                                                                                                                                                                                                                                                                                                                                                                                                                                                                                                                                                                                                                                                                                                                                                                                                                                                                                                                                                                                                                                                                                                                                                                                                                                                                                                                                                                                                                                                                                                                                                                                                |             |
|                                                      | Juntao Wang                                                                                                                                                                                                                                                                                                                                                                                                                                                                                                                                                                                                                                                                                                                                                                                                                                                                                                                                                                                                                                                                                                                                                                                                                                                                                                                                                                                                                                                                                                                                                                                                                                                                                                                                                                                 |             |
|                                                      | Jianjun Pan                                                                                                                                                                                                                                                                                                                                                                                                                                                                                                                                                                                                                                                                                                                                                                                                                                                                                                                                                                                                                                                                                                                                                                                                                                                                                                                                                                                                                                                                                                                                                                                                                                                                                                                                                                                 |             |

|                                                |                                                                                                                                                                                                                                                                                                                                                                                                                                                                                                                                                                                                                                                                                                                                                                                                                                                                                                                                                                                                                                                                                                                                                                                                                                                                                                                                                                                                                                                                                                                                                                                                                                                                                                                                                                                                                                                                                                                                                                                                                                                                                                                                                                                                                                                                                                                                                                                                                                                                                                                                                                                                                                                                                                                                                                                                                                                                                                                                                                                                                                                                                                                                                                                                                                                                                                                                                                                                                                                                                                                                                                                                                                                                                                                                                                                                                                                                                                                                                                                                                                                                                                                                                                                                                                                                                                                                                                                                                                                                                                                                                                                        |
|------------------------------------------------|----------------------------------------------------------------------------------------------------------------------------------------------------------------------------------------------------------------------------------------------------------------------------------------------------------------------------------------------------------------------------------------------------------------------------------------------------------------------------------------------------------------------------------------------------------------------------------------------------------------------------------------------------------------------------------------------------------------------------------------------------------------------------------------------------------------------------------------------------------------------------------------------------------------------------------------------------------------------------------------------------------------------------------------------------------------------------------------------------------------------------------------------------------------------------------------------------------------------------------------------------------------------------------------------------------------------------------------------------------------------------------------------------------------------------------------------------------------------------------------------------------------------------------------------------------------------------------------------------------------------------------------------------------------------------------------------------------------------------------------------------------------------------------------------------------------------------------------------------------------------------------------------------------------------------------------------------------------------------------------------------------------------------------------------------------------------------------------------------------------------------------------------------------------------------------------------------------------------------------------------------------------------------------------------------------------------------------------------------------------------------------------------------------------------------------------------------------------------------------------------------------------------------------------------------------------------------------------------------------------------------------------------------------------------------------------------------------------------------------------------------------------------------------------------------------------------------------------------------------------------------------------------------------------------------------------------------------------------------------------------------------------------------------------------------------------------------------------------------------------------------------------------------------------------------------------------------------------------------------------------------------------------------------------------------------------------------------------------------------------------------------------------------------------------------------------------------------------------------------------------------------------------------------------------------------------------------------------------------------------------------------------------------------------------------------------------------------------------------------------------------------------------------------------------------------------------------------------------------------------------------------------------------------------------------------------------------------------------------------------------------------------------------------------------------------------------------------------------------------------------------------------------------------------------------------------------------------------------------------------------------------------------------------------------------------------------------------------------------------------------------------------------------------------------------------------------------------------------------------------------------------------------------------------------------------------------------------------|
|                                                | Yehua He                                                                                                                                                                                                                                                                                                                                                                                                                                                                                                                                                                                                                                                                                                                                                                                                                                                                                                                                                                                                                                                                                                                                                                                                                                                                                                                                                                                                                                                                                                                                                                                                                                                                                                                                                                                                                                                                                                                                                                                                                                                                                                                                                                                                                                                                                                                                                                                                                                                                                                                                                                                                                                                                                                                                                                                                                                                                                                                                                                                                                                                                                                                                                                                                                                                                                                                                                                                                                                                                                                                                                                                                                                                                                                                                                                                                                                                                                                                                                                                                                                                                                                                                                                                                                                                                                                                                                                                                                                                                                                                                                                               |
| <b>Order of Authors Secondary Information:</b> |                                                                                                                                                                                                                                                                                                                                                                                                                                                                                                                                                                                                                                                                                                                                                                                                                                                                                                                                                                                                                                                                                                                                                                                                                                                                                                                                                                                                                                                                                                                                                                                                                                                                                                                                                                                                                                                                                                                                                                                                                                                                                                                                                                                                                                                                                                                                                                                                                                                                                                                                                                                                                                                                                                                                                                                                                                                                                                                                                                                                                                                                                                                                                                                                                                                                                                                                                                                                                                                                                                                                                                                                                                                                                                                                                                                                                                                                                                                                                                                                                                                                                                                                                                                                                                                                                                                                                                                                                                                                                                                                                                                        |
| <b>Response to Reviewers:</b>                  | <p>Dear Editor and Reviewer,</p> <p>We would like to thank you for helpful suggestions on our manuscript entitled "The chromosome-level draft genome of a diploid plum (<i>Prunus salicina</i>)" (GIGA-D-20-00195R1). Following the comments and suggestions, we corrected the numbering of the <i>P. salicina</i> pseudochromosomes all over the manuscript. The <i>P. salicina</i> pseudo-chromosome names and gene IDs in Figure 1, 3 and 4 were modified in the revised manuscript. We also contacted the staff of GDR (Genome Database for Rosaceae) and GenBank to update our genomic information. We expected that it would meet the publication requirement of GigaScience.</p> <p>A point by point response to the reviewer' comments and questions and the main corrections in the paper were provided below.</p> <p>Reviewer #1: I thank the authors for further revising their manuscript and clarifying some outstanding issues in regards of English proofreading and MS layout. Thank you very much for the answers to my previous questions, even if I do not fully agree with soem of them.</p> <p>However, there is still a major revision necessary before the manuscript is ready for publication. I bet I overlooked it in the first version of the manuscript because of the other issues that were since corrected. My main concern relates to the chromosome nomenclature: the chromosome numbering is not in adequation with the <i>Prunus</i> genetic map. For exemple, Chromosome 1 in all <i>Prunus</i> species is always the largest one and following Figure 1, it appears that it is chromosome 2, here. The same remark applies to the other chromosomes, not only chromosome 2 (see figure 2B, chromosome 1 of <i>P. salicina</i> should in fact be chromosome 6 in the <i>Prunus</i> genetic map, chr3 should be chr4 and so on), and that's the reason why I was recommending using, even a few, <i>Prunus</i> genetic markers, to correct this discrepancy. This major issue is coming from the first release of the <i>P. mume</i> genome in 2012 and was reproduced in the <i>P. armeniaca</i> genome presented here. If colinearity has to be displayed (Figure 3) then it should be made clear that Chr2 here should be in fact Chr 1 in the genetic map. In fact, I would once again recommend the authors to re-order their chromosomes, according to the general acknowledged genetic map. Since the genetic maps were obtained by using molecular markers which are largely colinear and syntenic in between <i>Prunus</i> species (peach, <i>P. mume</i>, apricot and plum included) I would strongly recommend to right this issue, both within the <i>P. salicina</i> assembly and the following colinearity studies with the other genomes. Since genetic maps were released before genome assembly, the authors are expected to follow the internationally acknowledged nomenclature. Reproducing forever the mistake made initially for the <i>P. mume</i> genome would severely limit the interest of this de novo assembled genome and thus the impact of its release.</p> <p>In conclusion, I recommend the authors to correct the numbering of the <i>P. salicina</i> chromosome all over the MS (by using a few of plum markers and even better <i>Prunus</i> orthologous markers as published in <a href="https://doi.org/10.1371/journal.pone.0208032">https://doi.org/10.1371/journal.pone.0208032</a>, for that they only need to do a ePCR with markers depicted in Table S2F) and the data available online (and therefore Figure 3, accordingly).</p> <p>Response : Thank you very much for your kindly suggestion. We further carefully read the literatures that you mentioned, and realized that the important role of the <i>Prunus</i> genetic maps was ignored in our first version of the manuscript. According to your kind advices, the numbering of the <i>P. salicina</i> pseudochromosome was corrected in the revised manuscript, using the markers that you recommended.</p> <p>The present pseudochromosome numbering is consisted with that in the published <i>P. salicina</i> genetic map (Ref 77 in the revised manuscript). The <i>P. salicina</i> pseudo-chromosomes names and gene IDs in Figure 1, 3 and 4 were modified in the revised manuscript. The detailed information about the <i>P. salicina</i> pseudochromosomes in Table S5 was corrected accordingly. Moreover, we also contacted the staff of GDR (Genome Database for Rosaceae) and GenBank to update our genomic information.</p> |

| Additional Information:                                                                                                                                                                                                                                                                                                                                                                                                                                                                                                             |          |
|-------------------------------------------------------------------------------------------------------------------------------------------------------------------------------------------------------------------------------------------------------------------------------------------------------------------------------------------------------------------------------------------------------------------------------------------------------------------------------------------------------------------------------------|----------|
| Question                                                                                                                                                                                                                                                                                                                                                                                                                                                                                                                            | Response |
| Are you submitting this manuscript to a special series or article collection?                                                                                                                                                                                                                                                                                                                                                                                                                                                       | No       |
| <p><b>Experimental design and statistics</b></p> <p>Full details of the experimental design and statistical methods used should be given in the Methods section, as detailed in our <a href="#">Minimum Standards Reporting Checklist</a>. Information essential to interpreting the data presented should be made available in the figure legends.</p> <p>Have you included all the information requested in your manuscript?</p>                                                                                                  | Yes      |
| <p><b>Resources</b></p> <p>A description of all resources used, including antibodies, cell lines, animals and software tools, with enough information to allow them to be uniquely identified, should be included in the Methods section. Authors are strongly encouraged to cite <a href="#">Research Resource Identifiers</a> (RRIDs) for antibodies, model organisms and tools, where possible.</p> <p>Have you included the information requested as detailed in our <a href="#">Minimum Standards Reporting Checklist</a>?</p> | Yes      |
| <p><b>Availability of data and materials</b></p> <p>All datasets and code on which the conclusions of the paper rely must be either included in your submission or deposited in <a href="#">publicly available repositories</a> (where available and ethically appropriate), referencing such data using a unique identifier in the references and in the “Availability of Data and Materials” section of your manuscript.</p>                                                                                                      | Yes      |

Have you have met the above requirement as detailed in our [Minimum Standards Reporting Checklist](#)?

# The chromosome-level draft genome of a diploid plum (*Prunus salicina*)

Chaoyang Liu<sup>1,3\*</sup>, Chao Feng<sup>2,\*</sup>, Weizhuo Peng<sup>1,3</sup>, Jingjing Hao<sup>1,3</sup>, Juntao Wang<sup>1,3</sup>  
Jianjun Pan<sup>4</sup>, Yehua He<sup>1,3</sup>

<sup>1</sup> Key Laboratory of Biology and Germplasm Enhancement of Horticultural Crops in South China, Ministry of Agriculture, South China Agricultural University, Guangzhou 510642, China

<sup>2</sup> Key Laboratory of Plant Resources Conservation and Sustainable Utilization, South China Botanical Garden, Chinese Academy of Sciences, Guangzhou 510650, China

<sup>3</sup> Maoming Branch, Guangdong Laboratory for Lingnan Modern Agriculture, Maoming 525000, China

<sup>4</sup> Agricultural Technology Extension Center of Conghua District, Guangzhou. Guangzhou 510900, Guangdong Province, China

\*Equal contribution

Corresponding author: Yehua He (email: [heyehua@hotmail.com](mailto:heyehua@hotmail.com))

30 **Abstract**

31 **Background:** Plums are one of the most economically important Rosaceae fruit crops,  
32 and contain dozens of species distributed across the world. Until now, only limited  
33 genomic information is available for the genetic studies and breeding programs of  
34 plums. *Prunus salicina*, an important diploid plum species, plays a predominant role  
35 in modern commercial plums production. Here we selected *P. salicina* for  
36 whole-genome sequencing and presented a chromosome-level genome assembly  
37 through the combination of PacBio sequencing, Illumina sequencing and Hi-C  
38 technology. **Findings:** The assembly had a total size of 284.2 Mb, with contig N50 of  
39 1.8Mb and scaffold N50 of 32.3Mb. 96.56% of the assembled sequences were  
40 anchored onto eight pseudochromosomes and a total of 24,448 protein-coding genes  
41 were identified. Phylogenetic analysis showed that *P. salicina* had closer relationship  
42 with *P. mume* and *P. armeniaca*, with *P. salicina* diverging from their common  
43 ancestor approximately 9.05 million years ago (Mya). 146 gene families were  
44 expanded during *P. salicina* evolution, and some cell wall-related GO terms were  
45 significantly enriched. It was noteworthy that members in the DUF579 family, a new  
46 class involved in xylan biosynthesis, were significantly expanded in *P. salicina*, which  
47 provided new insight into the xylan metabolism in plums. **Conclusions:** We  
48 constructed the first high-quality chromosome-level plum genome using PacBio,  
49 Illumina and Hi-C technologies. This work provides a valuable resource for  
50 facilitating plum breeding programs and studying the genetic diversity mechanisms of  
51 plums and *Prunus* species.

52

## 53 **Background**

54 Plums are one of the most economically important Rosaceae fruit crops and are  
55 produced throughout the world. About 12.6 million tons of plums (include sloes) are  
56 produced per year (FAOSTAT 2018, <http://faostat.fao.org/>), and the fruits are widely  
57 used for fresh consumption and processing like canning and beverages [1]. There are  
58 19-40 species of plums distributed across Asia, Europe and America. Plums have  
59 great diversity and are considered as a link between the major subgenera in the genus  
60 *Prunus* [2].

61 *Prunus salicina*, commonly called the Japanese plum or Chinese plum, is an  
62 important diploid ( $2x=2n=16$ ) plum species that predominates in the modern  
63 commercial production of plums (Fig. 1). *P. salicina* originates in China and its fruits  
64 are mostly used for fresh consumption for their characteristic taste [3]. Cultivars of *P.*  
65 *salicina* have wide variability in phenology, fruit size and shape, flavour, firmness,  
66 aroma, texture, phenolic composition, antioxidant activity and both skin and pulp  
67 color [4].

68 However, the genetic and genomic information for *P. salicina* as well as most plum  
69 species were scarce [5]. The availability of a fully sequenced and annotated genome  
70 will help to measure and characterize the genetic diversity and determine how this  
71 diversity relates to the tremendous phenotypic diversity among plum cultivars. The  
72 genomic information is essential to support many of the studies involved in  
73 fundamental questions about plums biology and genetics. Moreover, genome-based  
74 tools could be developed to improve breeding works of plums, which were usually  
75 hindered by the high degree of heterozygosity, self-incompatible and long juvenile  
76 stage [2, 5, 6].

77 The fruit firmness, one of the most important indices of plum quality, is closely  
78 associated with cell wall compositions [2]. Xylan is a major component of secondary  
79 cell walls [7], and the xylan metabolism is involved in various aspects of plant growth  
80 and development like fruit ripening and softening [8]. According to previous studies,  
81 the plum species presented more xylose (the main component of xylan) compared to

82 other *Prunus* species, and plums were regarded as one of the richest natural sources of  
83 xyliot [9, 10]. The relatively high levels of xylan-related metabolites may be  
84 associated with the distinct mechanisms of the xylan metabolism in plums, and the  
85 available plum genomic information will be helpful to better understand the  
86 mechanism at molecular level.

87 Genome resources are already available for a number of Rosaceae fruit crops [11],  
88 including apple [12-15], peach [16], pear [17-20], strawberry [21, 22], almond [23,  
89 24], black raspberry [25], sweet cherry [26, 27], apricot [28, 29], loquat [30] and  
90 *Prunus mume* [31]. However, whole-genome sequencing and chromosome-level  
91 assembly for plums have not been reported until now. In this study, *P. salicina* was  
92 selected for the whole-genome sequencing as a genomic reference. A high-quality  
93 chromosome-level *de novo* genome assembly of *P. salicina* was generated using an  
94 integrated strategy that combines PacBio sequencing, Illumina sequencing and Hi-C  
95 technology. The assembly has a total size of 284.2 Mb with contig N50 of 1.8Mb and  
96 scaffold N50 of 32.3 Mb, and vast majority (96.56%) of the assembled sequence was  
97 anchored onto eight pseudochromosomes. The availability of the high-quality  
98 chromosome-scale genome sequences not only provides fundamental knowledge  
99 regarding plum biology but also presents a valuable resource for genetic diversity  
100 analysis and breeding programs of plums and other *Prunus* crops.

101

## 102 **Methods**

### 103 **Sample collection**

104 The *Prunus salicina* Lindl. cv. ‘Sanyueli’, a Japanese plum landrace originating from  
105 Southern China, was selected for genome sequencing and assembly. ‘Sanyueli’ has a  
106 cultivation history of more than 200 years and many distinctive characteristics,  
107 including early-maturation, high-yield and low chilling requirements. The samples of  
108 the ‘Sanyueli’ were kept at the Horticultural Germplasm Conservation Center of  
109 South China Agricultural University (SCAU) for breeding and research in Guangzhou,  
110 Guangdong Province, China (113°22'4" N, 23°9'5" E). Total genomic DNA was



111 extracted from fresh young leaves of 5-year-old *P. salicina* tree using the CTAB  
112 method [32]. Samples from a total of six tissues, including leaf, flower, branch, young  
113 fruit pericarp, young fruit pulp and matured fruit, were collected from the same *P.*  
114 *salicina* tree. Total RNA was extracted from the six tissues using E.N.Z.A.<sup>®</sup> Plant  
115 RNA kit (OMEGA).

116

### 117 **Library construction and sequencing**

118 A combination of PacBio single-molecule real-time (SMRT) sequencing, Illumina's  
119 paired-end sequencing and Hi-C technology was applied. For PacBio sequencing,  
120 SMRT libraries were constructed using the PacBio 20-kb protocol  
121 (<https://www.pacb.com/>). The Illumina DNA paired-end libraries were constructed  
122 with an insert size of 350 bp, and sequencing was performed on the Illumina HiSeq  
123 4000 platform according to the manufacturer's instructions. Reads with adaptors, with  
124 more than 10% unknown bases (N) and with more than 50% low-quality bases ( $\leq 5$ )  
125 were filtered out to gain the clean data for further analysis.

126 The Hi-C library was prepared using the standard procedures. The young leaves of  
127 the same *P. salicina* tree were used as starting materials. Nuclear DNA from young  
128 leaves was cross-linked in situ, extracted, and digested with DpnII restriction  
129 endonuclease. The 5' overhangs of the digested fragments were biotinylated, and the  
130 resulting blunt ends were ligated. The cross-links were reversed after ligation,  
131 proteins were removed to release the DNA molecules. The purified DNA was sheared  
132 to a mean fragment size of 350 bp and ligated to adaptors, followed by purification  
133 through biotin-streptavidin-mediated pull down. The quality of Hi-C sequencing was  
134 evaluated with HiCUP [33].

135 The RNA-seq libraries for the six tissues of *P. salicina* were constructed according  
136 to the manufacturer's protocols, and were sequenced by Illumina HiSeq 4000 in  
137 paired-end 150bp mode.

138

### 139 **Genome size estimation and *de novo* assembly**

140 Sequencing data from the Illumina library were used to perform a k-mer analysis to

141 estimate the genome size of *P. salicina*. Quality-filtered reads were subjected to  
142 17-mer frequency distribution analysis using SOAPdenovo (SOAPdenovo, RRID:  
143 SCR\_010752) [34].

144 The *de novo* assembly of the *P. salicina* genome was carried out using the  
145 FALCON assembler (FALCON, RRID: SCR\_016089) [35], followed by the polishing  
146 with Quiver [36] and Pilon (Pilon, RRID: SCR\_014731) [37]. The PacBio subreads  
147 were subsequently processed by a self-correction of errors using FALCON [35]  
148 according to the manufacturer's instructions with the following parameters:  
149 length\_cutoff = 7,000, length\_cutoff\_pr = 4,000, max\_diff = 100, max\_cov = 100. The  
150 draft assembly was further polished using Quiver [36]. The pipeline of 'Purge  
151 Haplotigs' was used to remove the redundant sequences caused by genomic  
152 heterozygosity [38]. Finally, the Illumina reads were mapped back to the assembly  
153 and the remaining errors were corrected by Pilon [37].

154 Clean Hi-C reads were aligned to the assembled genome with BWA aligner (BWA,  
155 RRID: SCR\_010910) with default parameters [39]. Only uniquely aligned read pairs  
156 whose mapping quality more than 20 were remained for further analysis. Invalid read  
157 pairs, including dangling-end and self-cycle, relegation, and dumped products, were  
158 filtered by HiCUP [33]. The valid interaction pairs were used to cluster, order, and  
159 orient the assembly contigs onto pseudochromosomes by LACHESIS (LACHESIS,  
160 RRID:SCR\_017644; parameters: CLUSTER\_N = 8, CLUSTER\_MIN\_RE\_SITES  
161 = 1157, CLUSTER\_MAX\_LINK\_DENSITY = 5, CLUSTER  
162 \_NONINFORMATIVE\_RATIO = 0) [40]. The Juicebox [41] was applied to build the  
163 interaction matrices and complete the visual correction.

164

### 165 **Genome quality evaluation**

166 To evaluate the coverage of the assembly, the paired-end Illumina short reads were  
167 aligned to the assembly using BWA. RNA-seq reads from six tissues of *P. sacilina*  
168 were mapped against our assembly using Hisat with default parameters [42]. The  
169 SNPs were counted to evaluate the accuracy of the genome assembly. For CEGMA  
170 (Core Eukaryotic Genes Mapping Approach; CEGMA, RRID: SCR\_015055)

171 evaluation, a set of highly reliable conserved protein families that occur in a range of  
172 model eukaryotes were build and then the 248 core eukaryotic genes were mapped to  
173 the genome [43]. Genome completeness was also accessed using BUSCO  
174 (Benchmarking Universal Single-Copy Orthologs; RRID: SCR\_015008) analysis  
175 which included a set of 1440 single-copy orthologous genes [44].

176

### 177 **Repeat annotations**

178 To annotate repeat elements in the *P. salicina* genome, a combined strategy based on  
179 homology searching and *de novo* prediction was applied. For homology-based  
180 prediction, interspersed repeats were identified using RepeatMasker  
181 (<http://www.repeatmasker.org>) (RepeatMasker, RRID: SCR\_012954) and  
182 RepeatProteinMask (RepeatProteinMask, RRID: SCR 012954) [45] to search against  
183 the Repbase database [46]. For *de novo* prediction, RepeatScout  
184 (<http://www.repeatmasker.org/>) (RepeatScout, RRID:SCR 014653) [47],  
185 RepeatModeler (<http://www.repeatmasker.org/RepeatModeler/>) RepeatModeler  
186 (RRID:SCR\_015027), and LTR\_Finder ([http://tlife.fudan.edu.cn/tlife/ltr\\_finder/](http://tlife.fudan.edu.cn/tlife/ltr_finder/))  
187 (LTR\_Finder, RRID:SCR\_015247) [48] were used to identify *de novo* involved  
188 repeats. Tandem repeats were also *de novo* predicted using Tandem Repeats Finder  
189 (TRF) [49].

190 Telomere sequences were identified by BLASTN searches of both ends of the  
191 pseudochromosomes using four tandem repeats of the telomere repeat motif  
192 (TTTAGGG) with e-value cut-off of 0.003.

193

### 194 **Gene annotations**

195 A combination of three approaches, including homology-based prediction, *de novo*  
196 prediction and transcriptome-based prediction, was used to predict the protein-coding  
197 genes within *P. salicina* genome. For homology-based prediction, the homologous  
198 protein sequences of *Prunus persica*, *Prunus avium*, *Prunus mume*, *Pyrus*  
199 *bretschneideri*, *Malus domestica*, *Fragaria vesca* and *Arabidopsis thaliana* were  
200 obtained from NCBI database and mapped onto the *P. salicina* genome using TblastN

201 (TBLASTN; RRID:SCR\_011822) (E-value  $\leq 1e-5$ ) [50], and then the matching  
202 proteins were aligned to the homologous genome sequences for accurate spliced  
203 alignments with GeneWise (GeneWise, RRID:SCR\_015054) [51] to define gene  
204 models. For *de novo* prediction, Augustus (Augustus, RRID: SCR\_008417) [52],  
205 GlimmerHMM (GlimmerHMM, RRID: SCR\_002654) [53], SNAP (SNAP, RRID:  
206 SCR\_002127) [54], GeneID (GeneID, RRID: SCR\_002473) [55] and Genescan  
207 (Genescan, RRID: SCR\_012902) [56] were used to predict the coding regions of  
208 genes. For transcriptome-based predictions, RNA-seq data from six tissues were used  
209 for genome annotation, processed by HISAT2 (HISAT2, RRID: SCR\_015530) [42]  
210 and Stringtie (StringTie, RRID: SCR\_016323) [57]. RNA-seq data were also *de novo*  
211 assembled with Trinity (Trinity, RRID: SCR\_013048) [58]. The assembled sequences  
212 were aligned against *P. salicina* genome with PASA (Program to Assemble Spliced  
213 Alignment, PASA, RRID: SCR\_014656) [59], and the effective alignments were  
214 assembled to gene structures. Gene models predicted by all of the methods were  
215 integrated by EVIDENCEModeler (EVIDENCEModeler, RRID: SCR\_014659) [59]. To  
216 update the gene models, PASA was further used to generate UTRs [59].

217

## 218 **Gene functions**

219 The functional annotation of protein-coding genes within *P. salicina* genome was  
220 carried out by aligning protein sequences against SwissProt [60] and NR databases  
221 using BLASTp (with a threshold of E-value  $\leq 1e-5$ ). The protein motifs and domains  
222 were annotated by searching against InterPro (InterPro, RRID: SCR\_006695) [61] and  
223 Pfam (Pfam, RRID: SCR\_004726) database [62] with InterProScan (InterProScan,  
224 RRID: SCR\_005829) [63]. Gene Ontology (GO) terms for each gene were retrieved  
225 according to the corresponding InterPro entry. KEGG pathway was mapped by the  
226 constructed gene set to identify the best match for each gene [64].

227

## 228 **Non-coding RNA annotation**

229 The tRNAs were predicted using the program tRNAscan-SE (tRNAscan-SE, RRID:  
230 SCR\_010835) [65], and rRNA genes were annotated using BLASTN (BLASTN,

231 RRID: SCR\_001598) tool with E-value of 1e-5 against rRNA sequences from several  
232 relative plant species. miRNA and snRNA were identified by searching against the  
233 Rfam (Rfam, RRID:SCR\_007891) database [66] with default parameters using the  
234 INFERNAL software (INFERNAL, RRID:SCR\_011809)[67].

235

### 236 **Gene family construction**

237 OrthoFinder version 2.3.3 (OrthoFinder, RRID:SCR\_017118) [68] was used to  
238 classify the orthogroups of proteins from *P. salicina* and 16 other sequenced rosids  
239 species, including *P. armeniaca*, *P. mume*, *P. persica*, *P. dulcis*, *P. avium*, *P. yedoensis*,  
240 *M. domestica*, *P. bretschneideri*, *Pyrus communis*, *F. vesca*, *Potentilla micrantha*,  
241 *Rosa chinensis*, *Rosa multiflora*, *Rubus occidentalis*, *Morus notabilis* and *A. thaliana*.

242

### 243 **Phylogenetic tree and divergence time estimation**

244 For phylogenetic tree construction, proteins of single-copy orthogroups (i.e., the  
245 orthogroups which contain none or only one genes for each species) presented in at  
246 least 70% of species were selected and aligned with MAFFT version 6.846b (MAFFT,  
247 RRID: SCR\_011811) [69]. After determination of the best substitution model for each  
248 orthogroup with IQ-TREE version 1.7-beta12 (IQ-TREE, RRID: SCR\_017254) [70],  
249 the maximum likelihood phylogenetic tree across the 17 plant species was constructed  
250 using IQ-TREE with the parameter (-p -bb 1000), setting *A. thaliana* as outgroup.

251 The divergence time of each node in the phylogenetic tree was estimated with  
252 Bayesian Evolutionary Analysis Sampling Trees (BEAST, RRID: SCR\_010228)  
253 [71]. Two fossil constraints and a secondary calibration node were applied. The fossil  
254 *Prunus wutuensis* (age: Early Eocene, minimum age of 55.0 Mya) and the fossil  
255 *Rubus acutiformis* (age: Middle Eocene, minimum age of 41.3 Mya) were placed at  
256 the stem *Prunus* and *Rubus*, respectively [72]. For the secondary calibration node, the  
257 divergence of Rosoideae and Amygdaloideae at 100.7 Mya was dated according to  
258 Xiang et al. [72]. The Markov chain Monte Carlo was reported 10,000,000 times with  
259 1000 steps.

260

261 **Gene family expansion and contraction analysis**

262 For gene family expansion and contraction analysis, the ancestral gene content of  
263 each cluster at each node was investigated with CAFÉ version 3.1 (CAFÉ, RRID:  
264 SCR\_005983) [73], basing on the phylogeny and gene numbers per orthogroup in  
265 each species, the gene family expansions/contractions at each branch were determined  
266 with  $p$ -value  $< 0.001$ .

267

268 **Genome synteny analysis**

269 A Python version of MCScan (minspan=100; MCScan, RRID: SCR\_017650;  
270 <https://github.com/tanghaibao/jcvi/wiki/MCscan>) was employed to analyze the  
271 synteny between the *P. salicina* genome and other genomes within *Prunus* following  
272 the approaches of Haibao Tang [74].

273

274 **Positively selected gene analysis**

275 The ratios of nonsynonymous to synonymous substitutions ( $Ka/Ks$ ) were calculated  
276 using the Codeml program with the free-ratio model as implemented in the PAML  
277 (PAML, RRID: SCR\_014932) package [75]. The positive selection analysis was  
278 performed using the Codeml program with the optimized branch-site model as  
279 implemented in the PAML package. The positively selected genes were subjected to  
280 GO functional annotation.

281

282 **Gene Ontology enrichment analysis**

283 The Gene Ontology (GO) enrichment analysis for the specific groups of genes (e.g.  
284 tandem duplication and expanded genes) were performed using R package ‘topGO’  
285 [76], setting all *P. salicina* genes as background. The lowest-level GO terms under  
286 enrichment ( $p$ -value  $< 0.01$ ) were focused, and  $p$ -value was calculated using a ‘classic’  
287 algorithm with the ‘fisher’ test. The lowest-level GO terms was based on the directed  
288 acyclic graph (DAG) of GO, with the parameter ‘nodeSize = 100’.

289

290 **The identification of the DUF579 family members**

291 For the identification of the DUF579 family members, the hidden Markov model  
292 (HMM) profile corresponding to the DUF579 domain (PF04669) was downloaded  
293 from Pfam database (<http://pfam.sanger.ac.uk/>), and subsequently exploited for the  
294 genome of *P. salicina*, *P. persica*, *P. mume*, *P. armeniaca*, *P. dulcis* and *A. thaliana*  
295 using HMMER 3.0. The default parameters were employed and the cutoff value was  
296 set to 0.01.

297

## 298 **Results and Discussion**

### 299 **Genome sequencing and assembly**

300 We sequenced and assembled the genome of *P. salicina* using a combination of  
301 short-read sequencing from Illumina Hiseq, SMRT sequencing from PacBio and Hi-C  
302 technology. For the Illumina sequencing, a total of approximately 26.6 Gb ( $85.4 \times$   
303 coverage) short reads was obtained (Table S1). A total of ~53.0 Gb long-sequencing  
304 reads were generated by PacBio Sequel platform. After removing adaptors within  
305 sequences, about 52.9 Gb ( $169.7 \times$  coverage) subreads were obtained (Table S1). The  
306 subreads have a mean length of 13.2 kb (Table S2). About 59.1 Gb ( $189.5 \times$  coverage)  
307 sequencing data generated from Hi-C library was produced (Table S1). The quality of  
308 Hi-C sequencing was evaluated with HiCUP [33], and the effect rate was  
309 approximately 28.10% (Table S3).

310 In the genome assembly process, Illumina sequencing data were used for the  
311 genome survey and polishing of preliminary contigs, PacBio long reads were used for  
312 contig assembly and Hi-C reads were used for chromosome-level scaffolding. Based  
313 on the total number of k-mers (19,341,904,177), the estimated *P. salicina* genome size  
314 was calculated to be approximately 311.82 Mb (Figure S1). The heterozygous and  
315 repeat sequencing ratios were 0.70% and 54.49%, respectively (Table S4). The *de*  
316 *novo* genome assembly of *P. salicina* with a total length of 284.2 Mb (Table 1) was  
317 yielded. As shown in Fig. 1, the Hi-C assisted genome assembly was anchored onto  
318 the eight pseudochromosomes with lengths ranging from 23.70 to 54.53 Mb (Table  
319 S5), which were designated according to the published genetic map of *P. salicina* [77].

320 Five regions of tandemly repeated telomeric repeat sequences were identified on three  
321 pseudochromosomes (Table S5). The total length of pseudochromosomes accounted  
322 for 96.56% of the genome sequences (Figure 1), with contig N50 of 1.78 Mb and  
323 scaffold N50 of 32.32 Mb (Table1; Table S6).

324

### 325 **Evaluation of the genome assembly**

326 To assess the genome assembly quality, the Illumina clean data were aligned to the *P.*  
327 *salicina* genome, with the mapping rate of 96.93%. A total of 98.81% assembled  
328 genome was covered by the reads and the mapping coverage with at least 4×, 10×,  
329 20× was 98.48 %, 98.06% and 97.13%, respectively (Table1; Table S7). The RNA-seq  
330 reads were mapped against the genome assembly, and the percentage of aligned reads  
331 ranged from 92.44% to 95.25% (Table1; Table S8). A total of 3,668 homozygous  
332 SNPs were identified, accounting for only 0.0015% of the reference genome (Table  
333 S9). The low rate of homozygous SNPs suggested that the assembly had a high base  
334 accuracy. 234 Core Eukaryotic Genes (CEGs) out of the complete set of 248 CEGs  
335 (94.35%) were covered by the assembly, and 229 (92.34%) of these were complete  
336 (Table1; Table S10). BUSCO analysis based on single copy orthologs set showed that  
337 95.7% of the expected genes were identified as complete, 1.3% were fragmented, and  
338 only 3.0% were missing (Table1; Table S11). These results verified the high quality of  
339 the presently generated *P. salicina* genome assembly

340

### 341 **Genome annotation**

342 The results of the repeat annotations found that 48.28% of the assembly was covered  
343 with transposable elements (TE). Among them, long terminal repeat (LTR)  
344 retrotransposons represented the greatest proportion, making up 42.10% of the  
345 genome (Table1; Table S12). The TE percentage and density of duplicates resulted  
346 from tandem duplications were shown in Figure 1. Tandem duplicates occurred for  
347 9.8% of the genes (Table 1) and were preferentially enriched in ‘transferase activity  
348 (GO: 0016758 and GO: 0016747)’ and ‘phloem development (GO: 0010088)’ (Figure



349 S2). The significant enrichment of the sieve element occlusion genes in ‘phloem  
350 development’, which were involved in wound sealing of the phloem [78], might be  
351 associated with specific requirements during the damage response in *P. salicina*.

352 For gene annotations, we predicted 24,448 non-redundant protein-coding genes in  
353 *P. salicina*. There were 24,209 genes (~99.0%) that could be assigned to eight  
354 pseudochromosomes (Table 1), and the gene density was shown in Figure 1. The  
355 average number of exons per gene, and average CDS length were 4.97 and 1,157.42,  
356 respectively (Table 2). Further gene functional annotation showed that 23,931 (97.9%)  
357 protein-coding genes were successfully annotated (Table 1; Table S13). For the  
358 identification of non-coding RNA (ncRNA) genes, a total of 627 miRNA, 960 tRNA,  
359 273 rRNA and 2,023 snRNA in the *P. salicina* genome were predicted (Table S14).

360

### 361 **Evolution of the *P. salicina* genome**

362 The genome sequences of the representative sequenced rosid species were collected  
363 and subjected to comparative genomic analysis with *P. salicina* to reveal the genome  
364 evolution and divergence of *P. salicina*. A total of 15,751 orthogroups containing  
365 23,265 genes were found in *P. salicina*. Moreover, 1,010 genes which were specific to  
366 *P. salicina* were identified. A comparison of the predicted proteomes among the 17  
367 species indicated that 9,616, 10,447, 11,098, 13,963 and 15,512 orthogroups were  
368 shared between *P. salicina* and Rosids, Rosales, Rosaceae, Amygdaloideae and  
369 *Prunus*, respectively.

370 The phylogenetic analysis confirmed the close relationship among *P. salicina*, *P.*  
371 *mume* and *P. armeniaca*. The molecular clock of these plant genomes was also  
372 calculated. The data indicated that *P. salicina* diverged from the ancestor of *P. mume*  
373 and *P. armeniaca* approximately 9.05 Mya, from the ancestor of *P. persica* and  
374 *P. dulcis* 11.12 Mya (Figure 2).

375 We also explored the genome syntenic blocks between *P. salicina* and the other  
376 representative *Prunus* species. As shown in Fig. 3, our genome assembly of *P.*  
377 *salicina* exhibited a high level of genome synteny with all the other *Prunus* genomes,  
378 especially the genomes of *P. avium* and *P. dulcis*. Significantly fewer inversions were

379 found in *P. salicina* vs *P. avium* and *P. salicina* vs *P. dulcis* than that in *P. salicina* vs *P.*  
380 *mume* and *P. salicina* vs *P. armeniaca*.

381

### 382 **Expansion and contraction of gene families in *P. salicina***

383 The gene family analysis showed that during the evolution of *P. salicina*, 146 gene  
384 families were expanded and 500 gene families were contracted. The functional  
385 enrichment on Gene Ontology of those expanded gene families identified 60  
386 significantly enriched GO terms ( $p$ -value < 0.05) (Table S15; Figure S3).

387 It was noteworthy that genes from the expanded families were enriched in a series  
388 of cell wall related processes, such as ‘cell wall polysaccharide metabolic process  
389 (GO: 0010383)’, ‘hemicellulose metabolic process (GO: 0010410)’ and ‘regulation of  
390 cellular biosynthetic process (GO: 0031326)’. Specially, genes in ‘xylan biosynthetic  
391 process (GO: 0045492)’, which corresponded to the DUF579 family [79], were  
392 significantly expanded. Further investigation showed that the major copy differences  
393 were found in Clade II, which consisted of orthologs of IRX15/IRX15L [79], with  
394 seven members in *P. salicina* and only two to four members in other *Prunus* species  
395 (Figure 4). It was reported that IRX15 and IRX15L defined a new class of genes  
396 involved in xylan biosynthesis [80, 81]. The species-specific expansion of this new  
397 subclade might contribute to the relatively high content of xylan-related metabolites  
398 (like xylose and xyliot) in plum [9, 10], which provided new insight into the xylan  
399 metabolism in plum.

400 Moreover, the FRS (FAR1-related sequence) gene family, which played multiple  
401 roles in a wide range of cellular processes [82], was also significantly expanded in the  
402 phylogeny (GO: 000945), and the family expansion may be related to the genetic and  
403 phenotypic diversity in *P. salicina*.

404

### 405 **Positively selected genes in *P. salicina***

406 The  $K_a/K_s$  ratios for all the 2,314 single-copy orthologs shared with the sequenced  
407 *Prunus* species were calculated. A total of 213 candidate genes in *P. salicina*  
408 underwent positive selection ( $P < 0.05$ ). Most of them were enriched in the GO terms

409 involved in ‘monooxygenase activity (GO: 0004497)’ and ‘enzyme inhibitor activity  
410 (GO: 0004857)’ (Figure S4). It was noteworthy that the category ‘monooxygenase  
411 activity’ was also found in the enriched GO terms for the expanded gene families in *P.*  
412 *salicina*, which might provide valuable candidate genes for further functional  
413 investigations.

414

## 415 **Conclusions**

416 To our knowledge, this is the first report of the chromosome-level genome assembly  
417 of plums using Illumina and PacBio sequencing platforms with Hi-C technology. The  
418 assembly had a total size of 284.2 Mb, the contig and scaffold N50 reached 1.8 Mb  
419 and 32.3 Mb, respectively. A total of 24,448 protein-coding genes were predicted, and  
420 23,931 genes (97.9%) have been annotated. Phylogenetic analysis indicated that *P.*  
421 *salicina* was closely related to *P. mume* and *P. armeniaca*. Expanded gene families in  
422 *P. salicina* were significantly enriched in several cell-wall related processes.  
423 Remarkably, the *P. salicina*-specific expansion of the xylan biosynthesis-related  
424 DUF579 family provided new insight into the xylan metabolism in plums. Given the  
425 economic and evolutionary importance of *P. salicina*, the genomic data in this study  
426 offer a valuable resource for facilitating plum breeding programs and studying the  
427 genetic basis for agronomic and adaptive divergence of plum and *Prunus* species.

428

## 429 **Availability of supporting data and materials**

430 This Whole Genome Shotgun project has been deposited at DDBJ/ENA/GenBank  
431 under the accession WERZ00000000. The version described in this paper is version  
432 WERZ01000000. The raw sequencing data are available through the NCBI Sequence  
433 Read Archive (SRA) via accession numbers from SRR10233497 to SRR10233505,  
434 via the Project PRJNA574159. The transcriptome data are available through the NCBI  
435 SRA (from SRR10235674 to SRR10235679). The genome data have also been  
436 submitted to *Genome Database for Rosaceae* (Accession number: tfGDR1044). All  
437 annotation tables containing results of an analysis of the draft genome are available at

438 Figshare [83]. Supporting data is also available via the *GigaScience* database GigaDB  
439 [84].

440

#### 441 **Additional files**

442 **Table S1** Statistics of *P. salicina* genome sequencing data.

443 **Table S2** Statistics of characteristics of PacBio long-reads.

444 **Table S3** Statistics of Hi-C sequencing data.

445 **Table S4** Estimation of the genome size using k-mer analysis.

446 **Table S5** Summary of assembled 8 pseudochromosomes of *P. Salicina*.

447 **Table S6** Summary of the genome assembly of *P. Salicina*.

448 **Table S7** Statistics of mapping ratio in genome.

449 **Table S8** Summary of the transcriptome and their mapping rate on the genome  
450 assembly.

451 **Table S9** Number and density of SNPs in *P. salicina* genome.

452 **Table S10** Assessment of CEGMA.

453 **Table S11** Summary of BUSCO analysis results according to prediction.

454 **Table S12** Detailed classification of repeat sequences.

455 **Table S13** Statistics of functional annotation.

456 **Table S14** Summary of non-coding RNA.

457 **Table S15** List of the Gene ontology terms significantly enriched in the expanded  
458 gene families of *P. salicina*

459 **Figure S1** 17-mer frequency distribution in *P. salicina* genome.

460 **Figure S2** Gene ontology enrichment of the tandemly duplicated genes in *P. salicina*.

461 **Figure S3** Gene ontology enrichment of *P. salicina*-expanded genes.

462 **Figure S4** Gene ontology enrichment of the positively selected genes in *P. salicina*.

463

464 **Authors' Contributions**

465 Y.H.H. conceived the study. C.Y.L., C.F. and J.T.W. performed bioinformatics  
466 analysis. W.Z.P., J.J.H. and J.J.P. collected the samples and extracted the DNA. C.Y. L.  
467 and C. F. wrote the manuscript. All authors read and approved the final manuscript.

468

469 **Abbreviations**

470 BLAST: Basic Local Alignment Search Tool; BEAST: Bayesian Evolutionary  
471 Analysis Sampling Trees; bp: base pair; BUSCO: Benchmarking Universal  
472 Single-Copy Orthologs; CEGMA: Core Eukaryotic Genes Mapping Approach; CTAB:  
473 cetyltrimethylammonium bromide; EVM: EVIDENCEModeler; Gb: gigabase pair; GO:  
474 Gene Ontology; Hi-C: high-throughput chromosome conformation capture; kb:  
475 kilobase pair; KEGG: Kyoto Encyclopedia of Genes and Genomes; Mb: megabase  
476 pair; miRNA: microRNA; Mya: million years ago; NCBI: National Center for  
477 Biotechnology Information; PacBio: Pacific Biosciences; PAML: phylogenetic  
478 analysis by maximum likelihood; PASA: Program to Assemble Spliced Alignments;  
479 RNA-seq: RNA sequencing; rRNA: ribosomal RNA; SMRT: single-molecule  
480 real-time; SnRNA, small nuclear RNA; SNP: single-nucleotide polymorphism; TRF:  
481 Tandem Repeats Finder; tRNA: transfer RNA.

482

483 **Funding**

484 This work was financially supported by The Industry University Research  
485 Collaborative Innovation Major Projects of Guangzhou Science Technology  
486 Innovation Commission (201704020021) and Modern Agricultural Industry  
487 Technology System of Guangdong Province (2016LM1128).

488

489 **Competing interests**

490 The authors declare no competing interests.

491

492 **Figure Legends**

493 **Figure 1** The genome and photograph of *P. salicina*. Landscape of the *P. salicina*  
494 genome, comprising 8 pseudochromosomes that cover ~96.56% of assembly (A);  
495 Concentric circles, from outermost to innermost, showing TE percentage (red; B);  
496 gene density (green; C); density of duplicates resulted from tandem duplications (blue;  
497 D); (E) photograph of *P. salicina*.

498

499 **Figure 2** Evolution of *P. salicina* genome and orthogroups. (A) The phylogeny,  
500 divergence time and orthogroup expansions/contractions for 17 rosids species. The  
501 tree was constructed by maximum likelihood method using 341 single copy  
502 orthogroups. All nodes have 100% bootstrap support. Divergence time was estimated  
503 on a basis of three calibration points (blue circles). Blue bar indicates 95% HPD  
504 (highest posterior density) for each node. The numbers in red and green indicate the  
505 numbers of orthogroups that have expanded and contracted along particular branches,  
506 respectively. (B) The comparison of genes among 17 rosids. The grey bars indicate  
507 the genes belonging to 9,616 rosids-shared orthogroups in each of 17 rosids. The grey  
508 + green bars indicate the genes belonging to 10,447 rosales-shared orthogroups in  
509 each of 16 rosales. The grey + green + pink bars indicate the genes belonging to  
510 11,098 Rosaceae-shared orthogroups in each of 15 Rosaceae. The grey + green + pink  
511 + yellow bars indicate the genes belonging to 13,963 rosaceae-shared orthogroups in  
512 each of ten Amygdaloideae. The grey + green + pink + yellow + blue bars indicate the  
513 genes belonging to 15,512 *Prunus*-shared orthogroups in each of seven *Prunus*  
514 species. The red and stripe bars indicate the genes in species-specific orthogroups and  
515 unassigned genes, respectively. The white bars indicate the remaining genes for each  
516 genome.

517

518 **Figure 3** Chromosome-level collinearity patterns between *P. salicina*, *P. mume* and *P.*  
519 *armeniaca* (A) and between *P. salicina*, *P. avium* and *P. dulcis* (B). The numbers  
520 indicate the pseudochromosome order generated from the original genome sequence.

521 The pseudochromosome 2 and 6 in *P. armeniaca* and *P. mume* are reversed. Each gray  
522 line represents one block. The inverted regions are highlighted with brown color.

523 .

524 **Figure 4** The significant expansion of the DUF579 family members in *P. salicina*. (A)  
525 Phylogenetic tree of the DUF579 proteins from *P. salicina* (red circle), *P. persica*  
526 (hollow inverted triangle), *P. mume* (solid triangle), *P. armeniaca* (hollow diamond), *P.*  
527 *dulcis* (solid diamond) and *A. thaliana* (solid square). (B) The summary of the  
528 numbers of clade members in DUF579 family.

529

530 **Table 1** Summary of genome assembly and annotation for *P. salicina*

531

|                                                          | <b>Number or percentage</b> |
|----------------------------------------------------------|-----------------------------|
| <b>Assembly feature</b>                                  |                             |
| Total length of scaffolds (bp)                           | 284,209,110                 |
| Number of scaffolds                                      | 75                          |
| N50 of scaffolds (bp)                                    | 32,324,625                  |
| Total length of contigs (bp)                             | 284,189,410                 |
| Number of contigs                                        | 272                         |
| N50 of contigs (bp)                                      | 1,777,944                   |
| Mapping rate by reads from short-insert libraries        | 96.93%                      |
| Assembled CEGs                                           | 94.35%                      |
| Completely assembled CEGs                                | 92.34%                      |
| Complete BUSCOs                                          | 95.7%                       |
| Complete and single-copy BUSCOs                          | 86.5%                       |
| Complete and duplicated BUSCOs                           | 9.2%                        |
| Fragmented BUSCOs                                        | 1.3%                        |
| Missing BUSCOs                                           | 3.0%                        |
| RNA-Seq evaluation                                       | 92.44%-95.25%               |
| <b>Genome annotation</b>                                 |                             |
| Percentage of transposable elements (TE)                 | 48.28%                      |
| Percentage of long terminal repeat (LTR) retrotransposon | 42.1%                       |
| No. of predicted protein-coding genes                    | 24,448                      |
| No. of genes assigned to pseudochromosomes               | 24,209 (99.0%)              |
| No. of genes annotated to public database                | 23,930 (97.9%)              |
| No. of genes annotated to GO database                    | 13,484 (55.2%)              |
| No. of genes duplicated by tandem duplications           | 2,384(9.8%)                 |

532



533 **Table 2** Statistics of predicted protein-coding genes.

|                           | Gene set                    | Number  | Average transcript length (bp) | Average CDS length (bp) | Average exons per gene | Average exons length (bp) | Average intron length (bp) |
|---------------------------|-----------------------------|---------|--------------------------------|-------------------------|------------------------|---------------------------|----------------------------|
| <i>De novo</i> prediction | Augustus                    | 23,592  | 2,627.71                       | 1167.83                 | 4.80                   | 243.43                    | 384.45                     |
|                           | GlimmerHMM                  | 39,985  | 5,450.51                       | 747.07                  | 3.14                   | 238.12                    | 2200.59                    |
|                           | SNAP                        | 24,882  | 2,876.50                       | 728.45                  | 4.22                   | 172.73                    | 667.66                     |
|                           | Geneid                      | 33,780  | 3,829.40                       | 899.99                  | 4.44                   | 202.74                    | 851.78                     |
|                           | Genscan                     | 21,882  | 8,251.09                       | 1355.87                 | 6.34                   | 213.98                    | 1292.13                    |
| Homolog prediction        | <i>Pyrus bretschneideri</i> | 20,265  | 3,119.83                       | 1356.17                 | 4.74                   | 286.35                    | 472.06                     |
|                           | <i>Malus domestica</i>      | 20,010  | 2,920.17                       | 1361.30                 | 4.65                   | 292.56                    | 426.72                     |
|                           | <i>Prunus mume</i>          | 23,064  | 3,038.66                       | 1346.19                 | 4.78                   | 281.67                    | 447.84                     |
|                           | <i>Prunus persica</i>       | 28,915  | 2,296.51                       | 1099.56                 | 4.06                   | 270.55                    | 390.64                     |
|                           | <i>Arabidopsis thaliana</i> | 28,284  | 2,071.73                       | 973.28                  | 3.67                   | 265.51                    | 412.07                     |
|                           | <i>Fragaria vesca</i>       | 22,927  | 2,994.24                       | 1380.61                 | 4.59                   | 300.66                    | 449.24                     |
| RNA-seq                   | <i>Prunus avium</i>         | 22,715  | 3,077.20                       | 1351.28                 | 4.74                   | 284.86                    | 461.03                     |
|                           | PASA                        | 196,264 | 3,913.86                       | 1008.68                 | 5.16                   | 195.60                    | 698.88                     |
|                           | Transcripts                 | 42,450  | 11,076.28                      | 2360.92                 | 6.85                   | 344.83                    | 1490.64                    |
|                           | EVM                         | 27,981  | 2,736.70                       | 1061.73                 | 4.57                   | 232.52                    | 469.68                     |
|                           | PASA-update*                | 27,594  | 2,784.15                       | 1092.82                 | 4.64                   | 235.59                    | 464.83                     |
|                           | Final set*                  | 24,448  | 2,988.45                       | 1157.42                 | 4.97                   | 233.09                    | 461.72                     |

534 \* UTR regions were contained

535

## 536 **References**

- 537 1. Roussos PA, Efstathios N, Intidhar B, Denaxa N-K and Tsafouros A. Plum (*Prunus*  
538 *domestica* L. and *P. salicina* Lindl.). In: Monique Simmonds VRP, editor. Nutritional  
539 Composition of Fruit Cultivars. Elsevier; 2016. p. 639 - 666.
- 540 2. Topp BL, Russell DM, Neumüller M, Dalbó MA and Liu W. Plum. In: Maria Luisa Badenes  
541 DHB, editor. Fruit Breeding. Springer; 2012. p. 571-621.
- 542 3. Hartmann W and Neumüller M. Plum breeding. In: Shri Mohan Jain PMP, editor. Breeding  
543 Plantation Tree Crops: Temperate Species. Springer; 2009. p. 161-231.
- 544 4. Okie W and Hancock J. Plums. In: Hancock JF, editor. Temperate Fruit Crop Breeding.  
545 Springer Science & Business Media; 2008. p. 337-358.
- 546 5. Esmenjaud D and Dirlewanger E. Plum. In: Kole C, editor. Genome Mapping and Molecular  
547 Breeding in Plants. Springer; 2007. p. 119-135.
- 548 6. Guerra M and Rodrigo J. Japanese plum pollination: A review. *SCI Hortic-Amsterdam*  
549 2015;**197**:674-686.
- 550 7. Rennie EA and Scheller HV. Xylan biosynthesis. *Curr Opin Biotech* 2014;**26**:100-107.
- 551 8. Brummell DA and Schröder R. Xylan metabolism in primary cell walls. *NZ J Forestry Sci.*  
552 2009;**39**:125-143.
- 553 9. Renard CMGC and Ginies C. Comparison of the cell wall composition for flesh and skin  
554 from five different plums. *Food Chem* 2009;**114**(3):1042-1049.
- 555 10. Arcaño YD, García ODV, Mandelli D, Carvalho WA and Pontes LAM. Xylitol: A review on  
556 the progress and challenges of its production by chemical route. *Catal Today* 2020;**344**:2-14.
- 557 11. Aranzana MJ, Decroocq V, Dirlewanger E, Eduardo I, Gao ZS, Gasic K, et al. *Prunus*  
558 genetics and applications after *de novo* genome sequencing: achievements and prospects.  
559 *Hortic Res* 2019;**6** (1):1-25.
- 560 12. Velasco R, Zharkikh A, Affourtit J, Dhingra A, Cestaro A, Kalyanaraman A, et al. The  
561 genome of the domesticated apple (*Malus* × *domestica* Borkh.). *Nat Genet* 2010;**42**  
562 (10):833-839.
- 563 13. Chen X, Li S, Zhang D, Han M, Jin X, Zhao C, et al. Sequencing of a wild apple (*Malus*  
564 *baccata*) genome unravels the differences between cultivated and wild apple species  
565 regarding disease resistance and cold tolerance. *G3: Genes, Genomes, Genet* 2019;**9**  
566 (7):2051-2060.
- 567 14. Zhang L, Hu J, Han X, Li J, Gao Y, Richards CM, et al. A high-quality apple genome  
568 assembly reveals the association of a retrotransposon and red fruit colour. *Nat Commun*  
569 2019;**10** (1):1-13.
- 570 16. Verde I, Abbott AG, Scalabrin S, Jung S, Shu S, Marroni F, et al. The high-quality draft  
571 genome of peach (*Prunus persica*) identifies unique patterns of genetic diversity,  
572 domestication and genome evolution. *Nat Genet* 2013;**45**(5):487-494.
- 573 17. Linsmith G, Rombauts S, Montanari S, Deng CH, Celton J-M, Guérif P, et al.

- 574 Pseudo-chromosome-length genome assembly of a double haploid “Bartlett” pear (*Pyrus*  
575 *communis* L.) GigaScience 2019; 8 (12):giz138.
- 576 18. Wu J, Wang Z, Shi Z, Zhang S, Ming R, Zhu S, et al. The genome of the pear (*Pyrus*  
577 *bretschneideri* Rehd.). Genome Res 2013;**23**(2):396-408.
- 578 19. Chagné D, Crowhurst RN, Pindo M, Thrimawithana A, Deng C, Ireland H, et al. The draft  
579 genome sequence of European pear (*Pyrus communis* L. ‘Bartlett’). PloS One 2014;**9**  
580 (4):e92644.
- 581 20. Dong X, Wang Z, Tian L, Zhang Y, Qi D, Huo H, et al. *De novo* assembly of a wild pear  
582 (*Pyrus betuleafolia*) genome. Plant Biotechnol J 2020;**18**(2):581-595
- 583 21. Shulaev V, Sargent DJ, Crowhurst RN, Mockler TC, Folkerts O, Delcher AL, et al. The  
584 genome of woodland strawberry (*Fragaria vesca*). Nat Genet 2011;**43**(2):109-116.
- 585 22. Edger PP, Poorten TJ, VanBuren R, Hardigan MA, Colle M, McKain MR, et al. Origin and  
586 evolution of the octoploid strawberry genome. Nat Genet 2019;**51**(3):541-547.
- 587 23. Alioto T, Alexiou KG, Bardil A, Barteri F, Castanera R, Cruz F, et al. Transposons played a  
588 major role in the diversification between the closely related almond and peach genomes:  
589 Results from the almond genome sequence. Plant J 2020;**101**(2):455-472.
- 590 24. Sánchez-Pérez R, Pavan S, Mazzeo R, Moldovan C, Cigliano RA, Del Cueto J, et al.  
591 Mutation of a bHLH transcription factor allowed almond domestication. Science 2019; **364**  
592 (6445):1095-1098.
- 593 25. VanBuren R, Bryant D, Bushakra JM, Vining KJ, Edger PP, Rowley ER, et al. The genome of  
594 black raspberry (*Rubus occidentalis*). Plant J 2016;**87**(6):535-547.
- 595 26. Shirasawa K, Isuzugawa K, Ikenaga M, Saito Y, Yamamoto T, Hirakawa H, et al. The  
596 genome sequence of sweet cherry (*Prunus avium*) for use in genomics-assisted breeding.  
597 DNA Res 2017;**24**(5):499-508.
- 598 27. Wang J, Liu W, Zhu D, Hong P, Zhang S, Xiao S, et al. Chromosome-scale genome assembly  
599 of sweet cherry (*Prunus avium* L.) cv. Tieton obtained using long-read and Hi-C sequencing.  
600 Hort Res 2020;**7** (1):1-11.
- 601 28. Jiang F, Zhang J, Wang S, Yang L, Luo Y, Gao S, et al. The apricot (*Prunus armeniaca* L.)  
602 genome elucidates Rosaceae evolution and beta-carotenoid synthesis. Hort Res 2019;**6**  
603 (1):1-12.
- 604 29. Campoy JA, Sun H, Goel M, Jiao W-B, Folz-Donahue K, Kukat C, et al. Chromosome-level  
605 and haplotype-resolved genome assembly enabled by high-throughput single-cell sequencing  
606 of gamete genomes. BioRxiv. 2020.
- 607 30. Jiang S, An H, Xu F and Zhang X. Chromosome-level genome assembly and annotation of  
608 the loquat (*Eriobotrya japonica*) genome. GigaScience 2020;**9**(3):giaa015.
- 609 31. Zhang Q, Chen W, Sun L, Zhao F, Huang B, Yang W, et al. The genome of *Prunus mume*.  
610 Nat Commun 2012;**3**:1318.
- 611 32. Lodhi MA, Ye G-N, Weeden NF and Reisch BI. A simple and efficient method for DNA  
612 extraction from grapevine cultivars and *Vitis* species. Plant Mol Biol Rep. 1994;**12** (1):6-13.

- 613 33. Wingett S, Ewels P, Furlan-Magaril M, Nagano T, Schoenfelder S, Fraser P, et al. HiCUP:  
614 pipeline for mapping and processing Hi-C data. *F1000Res* 2015;**4**:1310.
- 615 34. Luo R, Liu B, Xie Y, Li Z, Huang W, Yuan J, et al. SOAPdenovo2: an empirically improved  
616 memory-efficient short-read *de novo* assembler. *Gigascience* 2012;**1** (1):2047-217X-1-18.
- 617 35. Chin C-S, Peluso P, Sedlazeck FJ, Nattestad M, Concepcion GT, Clum A, et al. Phased  
618 diploid genome assembly with single-molecule real-time sequencing. *Nat Methods* 2016;**13**  
619 (12):1050-1054.
- 620 36. Chin C-S, Alexander DH, Marks P, Klammer AA, Drake J, Heiner C, et al. Nonhybrid,  
621 finished microbial genome assemblies from long-read SMRT sequencing data. *Nat Methods*  
622 2013;**10**(6):563-569.
- 623 37. Walker BJ, Abeel T, Shea T, Priest M, Abouelliel A, Sakthikumar S, et al. Pilon: an integrated  
624 tool for comprehensive microbial variant detection and genome assembly improvement. *PLoS*  
625 *One* 2014;**9** (11):e112963.
- 626 38. Roach MJ, Schmidt SA and Borneman ARJB. Purge Haplotigs: allelic contig reassignment  
627 for third-gen diploid genome assemblies. *BMC Bioinformatics* 2018;**19** (1):460.
- 628 39. Li H and Durbin R. Fast and accurate short read alignment with Burrows-Wheeler transform.  
629 *Bioinformatics* 2009;**25** (14):1754-1760.
- 630 40. Burton JN, Adey A, Patwardhan RP, Qiu R, Kitzman JO and Shendure J. Chromosome-scale  
631 scaffolding of *de novo* genome assemblies based on chromatin interactions. *Nat Biotechnol*  
632 2013;**31** (12):1119-1125.
- 633 41. Robinson JT, Turner D, Durand NC, Thorvaldsdottir H, Mesirov JP and Aiden EL. Juicebox.  
634 js provides a cloud-based visualization system for Hi-C data. *Cell Syst* 2018;**6**(2):256-258.  
635 e1.
- 636 42. Kim D, Langmead B and Salzberg SL. HISAT: a fast spliced aligner with low memory  
637 requirements. *Nat Methods* 2015;**12** (4):357-360.
- 638 43. Parra G, Bradnam K and Korf I. CEGMA: a pipeline to accurately annotate core genes in  
639 eukaryotic genomes. *Bioinformatics* 2007;**23** (9):1061-1067.
- 640 44. Simão FA, Waterhouse RM, Ioannidis P, Kriventseva EV and Zdobnov EM. BUSCO:  
641 assessing genome assembly and annotation completeness with single-copy orthologs.  
642 *Bioinformatics* 2015;**31**(19):3210-3212.
- 643 45. Tarailo-Graovac M and Chen N. Using RepeatMasker to identify repetitive elements in  
644 genomic sequences. *Curr Protoc Bioinf* 2009;**25** (1):4-10.
- 645 46. Jurka J, Kapitonov VV, Pavlicek A, Klonowski P, Kohany O and Walichiewicz J. Repbase  
646 Update, a database of eukaryotic repetitive elements. *Cytogenet Genome Res* 2005;**110**  
647 (1-4):462-467.
- 648 47. Price AL, Jones NC and Pevzner PA. *De novo* identification of repeat families in large  
649 genomes. *Bioinformatics* 2005;**21** (suppl\_1):i351-i358.
- 650 48. Xu Z and Wang H. LTR\_FINDER: an efficient tool for the prediction of full-length LTR  
651 retrotransposons. *Nucleic Acids Res* 2007;**35** (suppl\_2):W265-W268.

- 652 49. Benson G. Tandem repeats finder: a program to analyze DNA sequences. *Nucleic Acids Res*  
653 1999;**27** (2):573-580.
- 654 50. Gertz EM, Yu Y-K, Agarwala R, Schäffer AA and Altschul SF. Composition-based statistics  
655 and translated nucleotide searches: improving the TBLASTN module of BLAST. *BMC Biol*  
656 2006;**4** (1):1-14.
- 657 51. Birney E, Clamp M and Durbin R. GeneWise and genomewise. *Genome Res* 2004;**14**  
658 (5):988-995.
- 659 52. Stanke M, Steinkamp R, Waack S and Morgenstern B. AUGUSTUS: a web server for gene  
660 finding in eukaryotes. *Nucleic Acids Res* 2004;**32** (suppl\_2):W309-W312.
- 661 53. Majoros WH, Pertea M and Salzberg SL. TigrScan and GlimmerHMM: two open source ab  
662 initio eukaryotic gene-finders. *Bioinformatics* 2004;**20** (16):2878-2879.
- 663 54. Korf I. Gene finding in novel genomes. *BMC Bioinf* 2004;**5** (1):59.
- 664 55. Blanco E, Parra G and Guigó R. Using geneid to identify genes. *Curr Protoc Bioinf* 2007;**18**  
665 (1):4.3. 1-4.3. 28.
- 666 56. Burge C and Karlin S. Prediction of complete gene structures in human genomic DNA. *J Mol*  
667 *Biol* 1997;**268** (1):78-94.
- 668 57. Pertea M, Pertea GM, Antonescu CM, Chang T-C, Mendell JT and Salzberg SL. StringTie  
669 enables improved reconstruction of a transcriptome from RNA-seq reads. *Nat Biotechnol*  
670 2015;**33**(3):290-295.
- 671 58. Haas BJ, Papanicolaou A, Yassour M, Grabherr M, Blood PD, Bowden J, et al. *De novo*  
672 transcript sequence reconstruction from RNA-seq using the Trinity platform for reference  
673 generation and analysis. *Nat Protoc* 2013;**8** (8):1494-1512.
- 674 59. Haas BJ, Salzberg SL, Zhu W, Pertea M, Allen JE, Orvis J, et al. Automated eukaryotic gene  
675 structure annotation using EVIDENCEModeler and the Program to Assemble Spliced  
676 Alignments. *Genome Biol* 2008;**9** (1):R7.
- 677 60. Bairoch A and Apweiler R. The SWISS-PROT protein sequence database and its supplement  
678 TrEMBL in 2000. *Nucleic Acids Res* 2000;**28** (1):45-48.
- 679 61. Mulder N and Apweiler R. InterPro and InterProScan: tools for protein sequence classification  
680 and comparison. *Methods Mol Biol* 2007; **396**:59-70.
- 681 62. Finn RD, Bateman A, Clements J, Coggill P, Eberhardt RY, Eddy SR, et al. Pfam: the protein  
682 families database. *Nucleic Acids Res* 2013;**42** (D1):D222-D230.
- 683 63. Jones P, Binns D, Chang H-Y, Fraser M, Li W, McAnulla C, et al. InterProScan 5:  
684 genome-scale protein function classification. *Bioinformatics* 2014;**30** (9):1236-1240.
- 685 64. Kanehisa M and Goto S. KEGG: kyoto encyclopedia of genes and genomes. *Nucleic Acids*  
686 *Res* 2000;**28** (1):27-30.
- 687 65. Lowe TM and Eddy SR. tRNAscan-SE: a program for improved detection of transfer RNA  
688 genes in genomic sequence. *Nucleic Acids Res* 1997;**25** (5):955-964.
- 689 66. Griffiths-Jones S, Bateman A, Marshall M, Khanna A and Eddy SR. Rfam: an RNA family  
690 database. *Nucleic Acids Res* 2003;**31**(1):439-441.

- 691 67. Nawrocki EP and Eddy SR. Infernal 1.1: 100-fold faster RNA homology searches.  
692 Bioinformatics 2013;**29** (22):2933-2935.
- 693 68. Emms DM and Kelly S. OrthoFinder: solving fundamental biases in whole genome  
694 comparisons dramatically improves orthogroup inference accuracy. Genome Biol 2015;**16**  
695 (1):157.
- 696 69. Katoh K and Standley DM. MAFFT multiple sequence alignment software version 7:  
697 improvements in performance and usability. Mol Biol Evol 2013;**30** (4):772-780.
- 698 70. Nguyen L-T, Schmidt HA, Von Haeseler A and Minh BQ. IQ-TREE: a fast and effective  
699 stochastic algorithm for estimating maximum-likelihood phylogenies. Mol Biol Evol 2015;**32**  
700 (1):268-274.
- 701 71. Drummond AJ and Rambaut A. BEAST: Bayesian evolutionary analysis by sampling trees.  
702 BMC Evol Biol 2007;**7** (1):1-8.
- 703 72. Xiang Y, Huang C-H, Hu Y, Wen J, Li S, Yi T, et al. Evolution of Rosaceae fruit types based  
704 on nuclear phylogeny in the context of geological times and genome duplication. Mol Biol  
705 Evol 2017;**34** (2):262-281.
- 706 73. De Bie T, Cristianini N, Demuth JP and Hahn MW. CAFE: a computational tool for the study  
707 of gene family evolution. Bioinformatics 2006;**22** (10):1269-1271.
- 708 74. Tang H. Multiple collinearity scan—mcsan. 2009.
- 709 75. Yang Z. PAML 4: phylogenetic analysis by maximum likelihood. Mol Biol Evol  
710 2007;**24**(8):1586-1591.
- 711 76. Alexa A and Rahnenführer J. Gene set enrichment analysis with topGO. Bioconductor  
712 Improv. 2009;27.
- 713 77. Carrasco B, González M, Gebauer M, García-González R, Maldonado J and Silva HJPo.  
714 Construction of a highly saturated linkage map in Japanese plum (*Prunus salicina* L.) using  
715 GBS for SNP marker calling. PloS one 2018;**13** (12): e0208032.
- 716 78. Ernst AM, Jekat SB, Zielonka S, Müller B, Neumann U, Rüping B, et al. Sieve element  
717 occlusion (SEO) genes encode structural phloem proteins involved in wound sealing of the  
718 phloem. P Natl Acad Sci USA 2012;**109** (28): E1980-E1989.
- 719 79. Temple H, Mortimer JC, Tryfona T, Yu X, Lopez - Hernandez F, Sorieul M, et al. Two  
720 members of the DUF 579 family are responsible for arabinogalactan methylation in  
721 Arabidopsis. Plant Direct 2019;**3** (2):e00117.
- 722 80. Jensen JK, Kim H, Cocuron JC, Orlor R, Ralph J and Wilkerson CG. The DUF579 domain  
723 containing proteins IRX15 and IRX15-L affect xylan synthesis in Arabidopsis. Plant J  
724 2011;**66** (3):387-400.
- 725 82. Brown D, Wightman R, Zhang Z, Gomez LD, Atanassov I, Bukowski JP, et al. Arabidopsis  
726 genes IRREGULAR XYLEM (IRX15) and IRX15L encode DUF579 - containing proteins  
727 that are essential for normal xylan deposition in the secondary cell wall. Plant J 2011;**66**  
728 (3):401-413.
- 729 82. Ma L and Li G. FAR1-related sequence (FRS) and FRS-related factor (FRF) family proteins

730 in *Arabidopsis* growth and development. Front Plant Sci 2018; 9:692.  
731 83. Liu C, Feng C, Peng W, Hao J, Pan J, He Y. Annotation results of *Prunus salicina* genome  
732 Figshare 2020. <https://doi.org/10.6084/m9.figshare.9973469>.  
733 84 Liu C, Feng C, Peng W, Hao J, Wang J, Pan J, He Y Supporting data for "The  
734 chromosome-level draft genome of a diploid plum (*Prunus salicina*)"  
735 GigaScience Database. 2020. <http://dx.doi.org/10.5524/100811>  
736

Figure 1

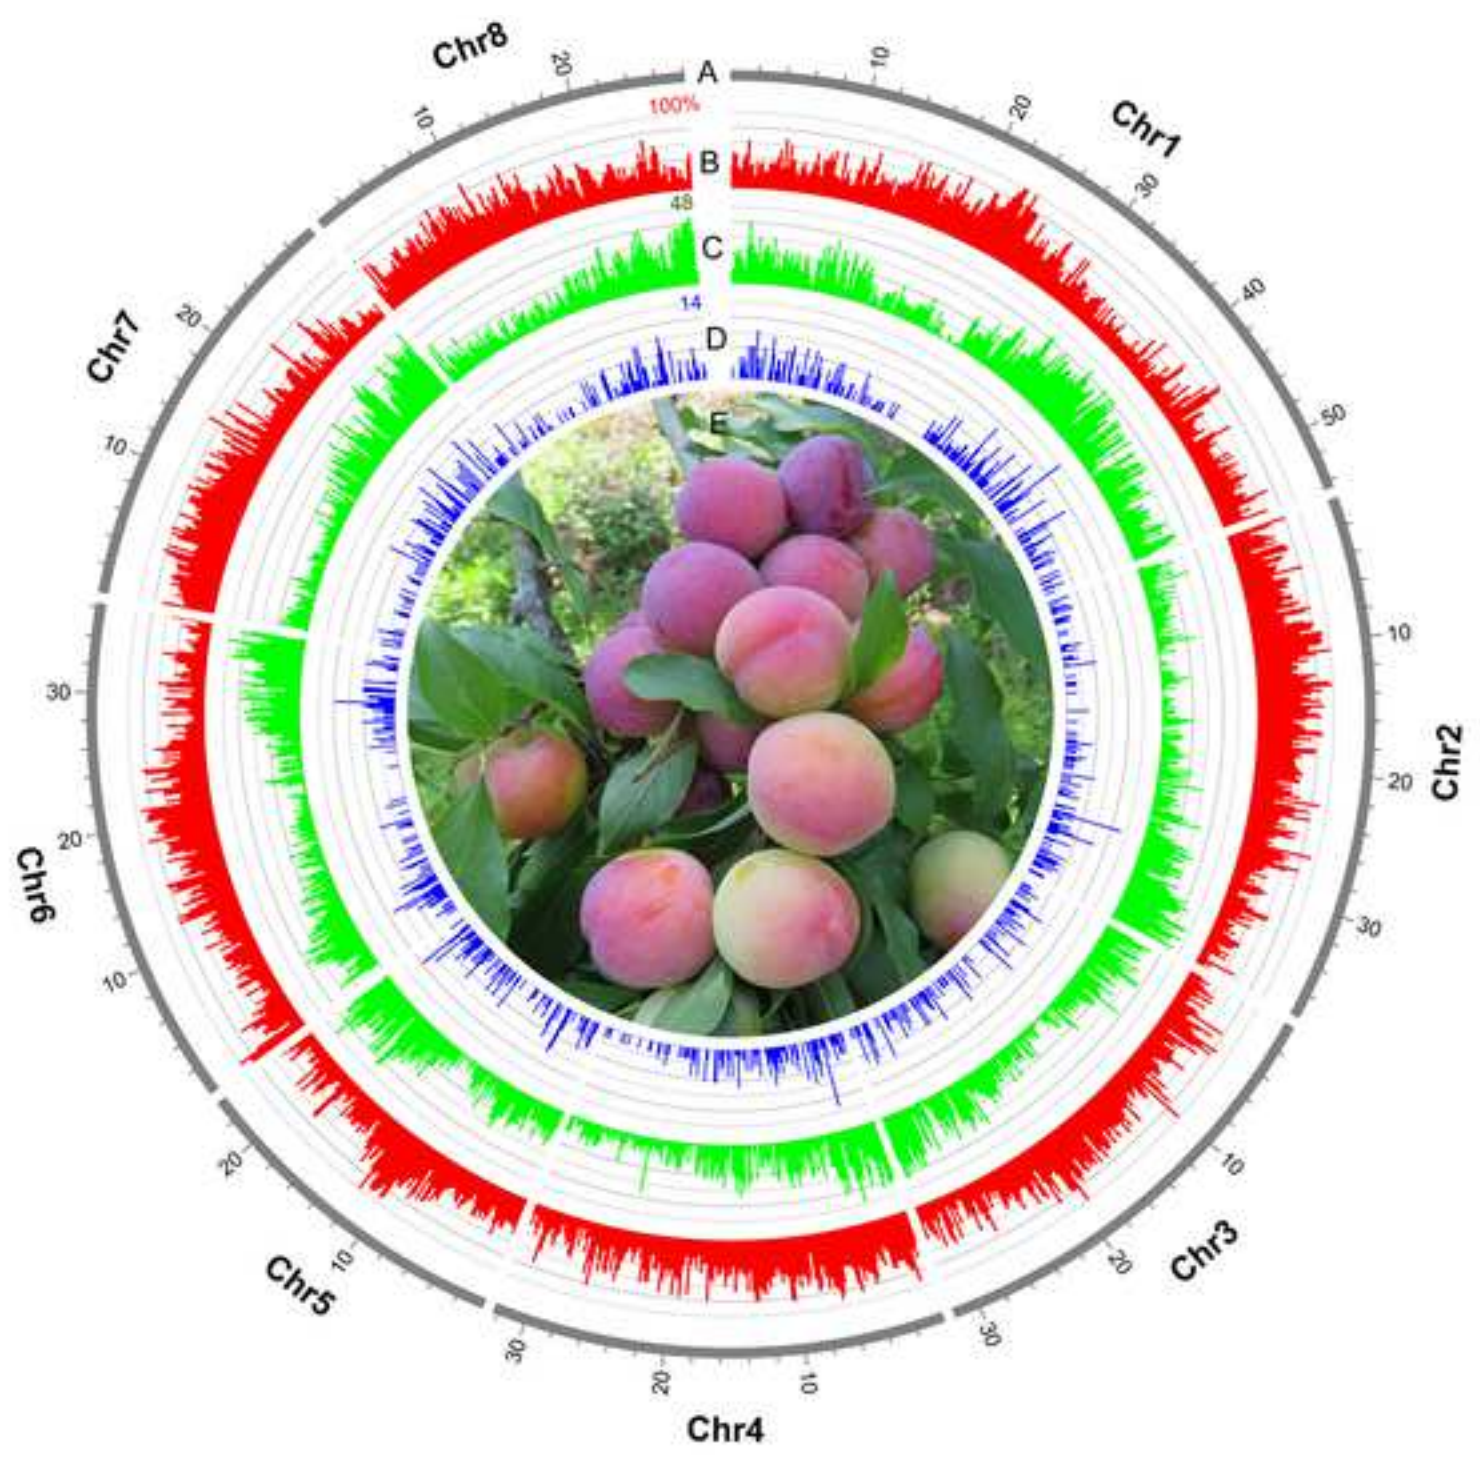



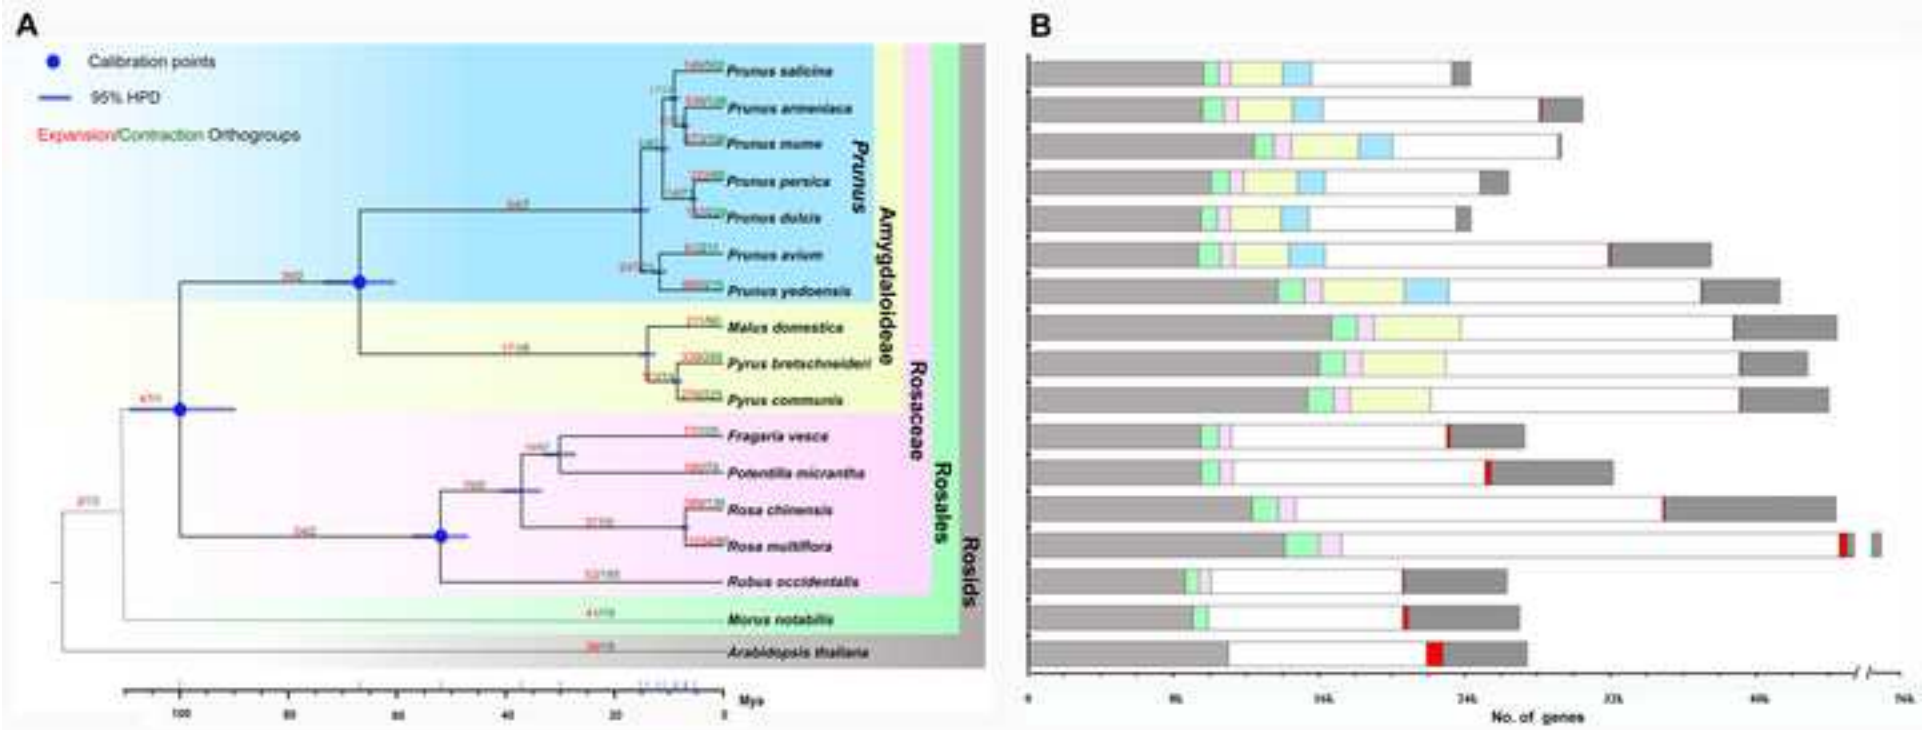

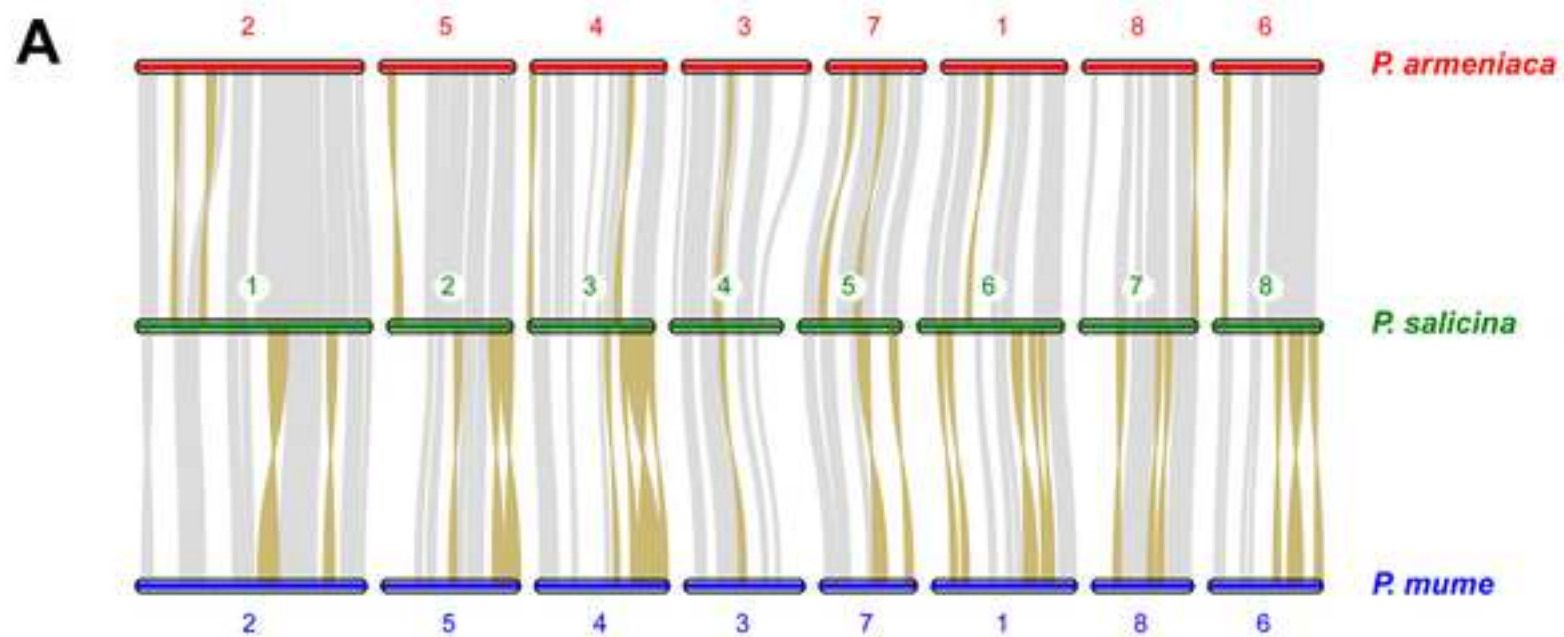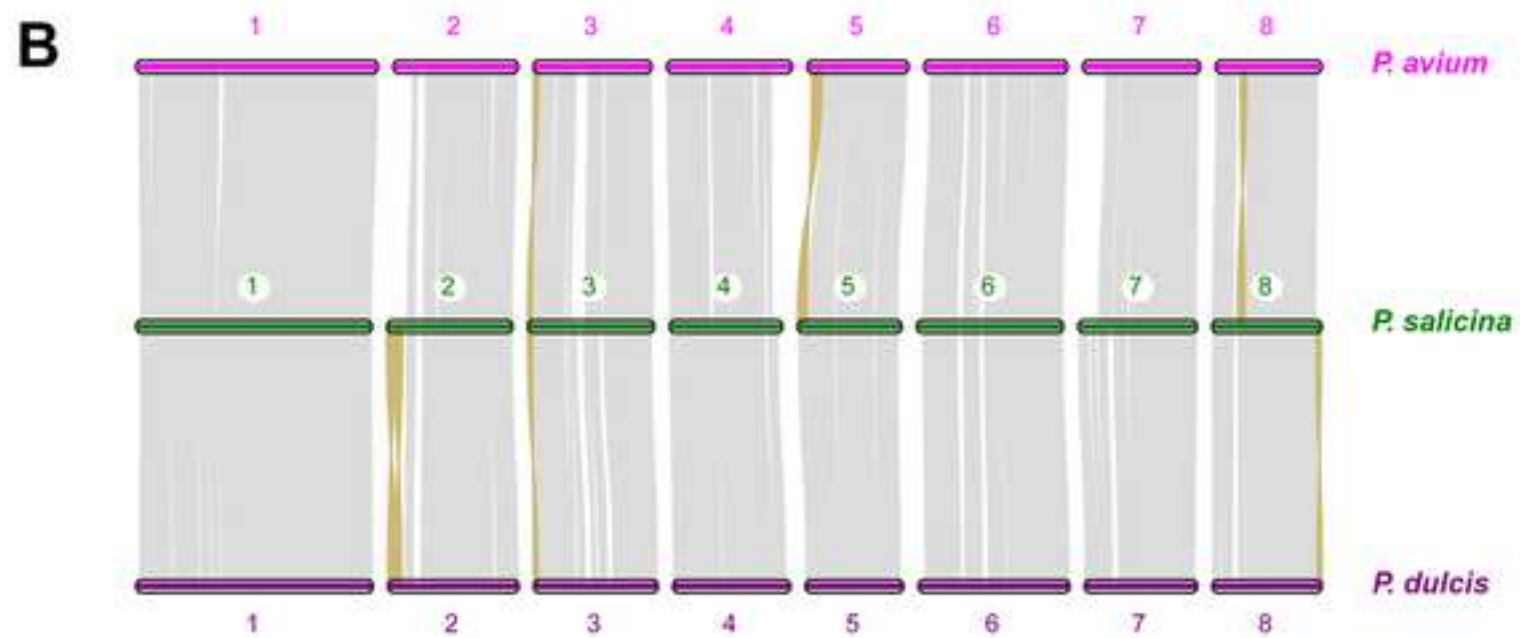

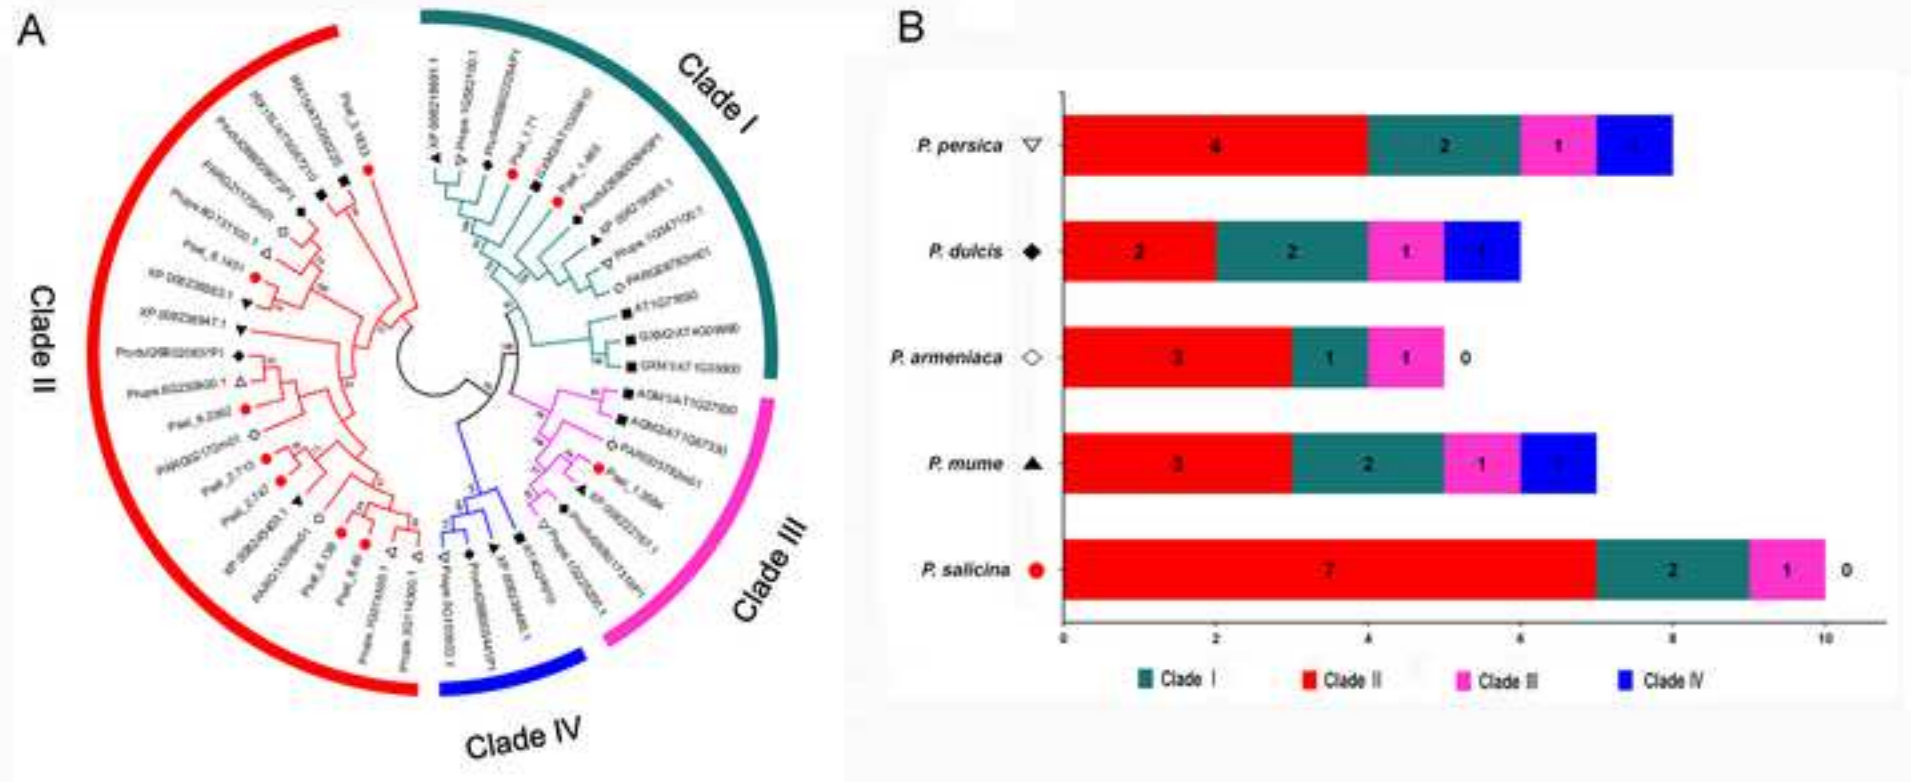

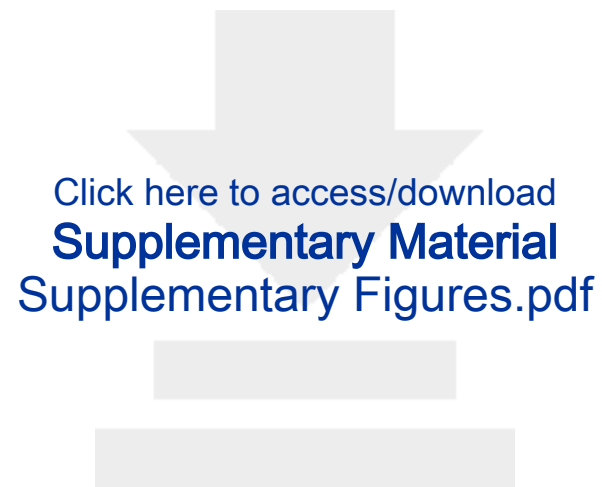

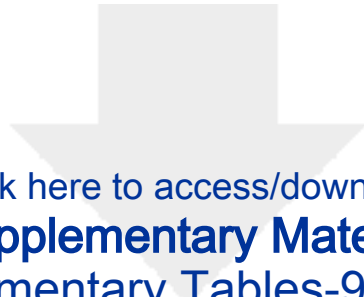

Click here to access/download  
**Supplementary Material**  
Supplementary Tables-9-28.xlsx

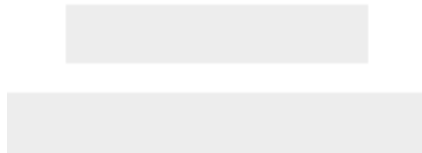

Supplement: giaa130_giga-d-20-00195_revision_2.pdf [file giaa130_giga-d-20-00195_revision_2.pdf]
